# Supplementary material for: Bifunctional squaramide catalyzed asymmetric synthesis of chiral α-mercaptosilanes
Source: Royal Society of Chemistry journal article supplement (doi:10.1039/d1ob00981h), 2021-01-01
Supplement: d1ob00981h1.pdf [file d1ob00981h1.pdf]

*Supporting Information for*

**Bifunctional squamide-catalyzed asymmetric  
synthesis of chiral  $\alpha$ -mercaptosilanes**

Ye Zhang,<sup>a,†</sup> Jingcheng Guo,<sup>a,†</sup> Jinna Han,<sup>a</sup> Xiangui Zhou,<sup>a</sup> Wei Cao,<sup>a</sup> and Zhenqian Fu<sup>\*,a</sup>

<sup>a</sup> Key Laboratory of Flexible Electronics & Institute of Advanced Materials, Nanjing Tech University, 30 South Puzhu Road, Nanjing 211816, China. E-mail: iamzqfu@njtech.edu.cn.

|            |                                                                                                                                                                                                                                                                                                                                         |
|------------|-----------------------------------------------------------------------------------------------------------------------------------------------------------------------------------------------------------------------------------------------------------------------------------------------------------------------------------------|
| <b>I</b>   | General information                                                                                                                                                                                                                                                                                                                     |
| <b>II</b>  | a) Synthesis of $\beta$ -silylated enones <b>1</b><br>b) General procedure for the reactions of <b>1</b> with <b>2</b> to synthesize products <b>3</b> ( <b>3a</b> as an example)<br>c) General procedure for the reactions of <b>4</b> from <b>3b</b><br>d) Stereochemistry determination <b>4</b> via X-ray crystallographic analysis |
| <b>III</b> | a) Characterizations of products<br>b) References                                                                                                                                                                                                                                                                                       |
| <b>IV</b>  | <sup>1</sup> H, <sup>13</sup> C, <sup>19</sup> F NMR spectra and HPLC data of products                                                                                                                                                                                                                                                  |

## I: General Information

Commercially available materials were purchased from Alfa Aesar and Sigma-Aldrich. THF was distilled over sodium. Other solvents were dried over 4Å molecular sieve prior use. Proton nuclear magnetic resonance ( $^1\text{H}$  NMR) spectra were recorded on a Bruker (400 MHz) spectrometer. Chemical shifts were recorded in parts per million (ppm,  $\delta$ ) relative to tetramethylsilane ( $\delta$  0.00) or chloroform ( $\delta$  = 7.26, singlet).  $^1\text{H}$  NMR splitting patterns are designated as singlet (s), doublet (d), triplet (t), quartet (q), doublet of doublets (dd), triplet of doublets (dt), triplet of triplets (tt), multiplets (m), and etc. All first-order splitting patterns were assigned on the basis of the appearance of the multiplet. Splitting patterns that could not be easily interpreted are designated as multiplet (m) or broad (br). Carbon nuclear magnetic resonance ( $^{13}\text{C}$  NMR) spectra were recorded on a Bruker (400 MHz) (100 MHz) spectrometer. High resolution mass spectral analysis (HRMS) was performed on a Waters Q-TOF Premier Spectrometer. The determination of enantiomeric excess was performed *via* chiral HPLC analysis using Shimadzu LC-20AD HPLC workstation. X-ray crystallography analysis was performed on Bruker X8 APEX X-ray diffractionmeter. Optical rotations were measured using a 1 mL cell with a 1 dm path length on a Jasco P-1030 polarimeter and are reported as follows:  $[\alpha]_D^{rt}$  ( $c$  is in gm per 100 mL solvent). Analytical thin-layer chromatography (TLC) was carried out on Merck 60 F254 pre-coated silica gel plate (0.2 mm thickness).

## II. General procedure

### a) Synthesis of $\beta$ -silylated enones 1

$\beta$ -silyl enones **1a**~**1q** were synthesized according to the literature.<sup>[1-5]</sup>

### b) General procedure for the reactions of **1** with **2** to synthesize products **3** (**3a** as an example)

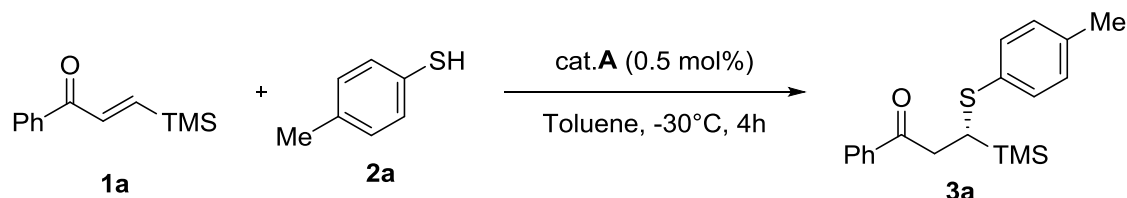

To a dried 10 mL Schlenk tube equipped with a tiny magnetic stir bar was added **1a** (0.1 mmol, 20.4 mg), **2a** (0.11 mmol, 13.6 mg) and Cat.A (0.0005 mmol, 0.3 mg). To this mixture was added dry Toluene (3.0 mL), then the reaction mixture was stirred at -30 °C for 4 hours. The reaction mixture was purified by flash column chromatography (silica gel, Petroleum ether/EtOAc, 20:1, v/v) to afford product **3a** (0.095 mmol, 31.2 mg) as a colorless oil in 95% yield and 92% *ee*.

### c) General procedure for the reactions of **4** from **3b**

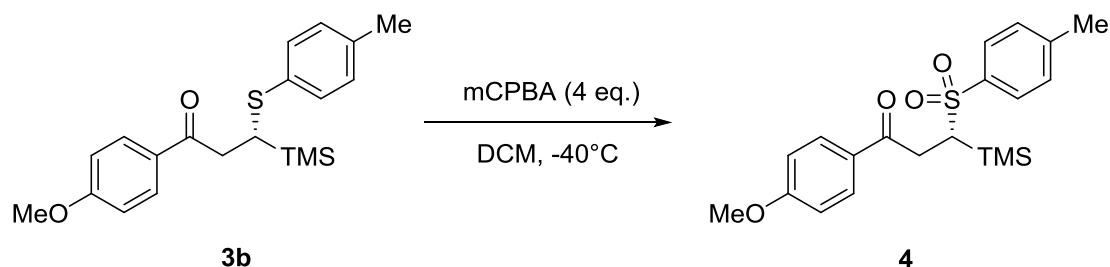

To a dried 10 mL Schlenk tube equipped with a tiny magnetic stir bar was added **3b** (0.1 mmol, 35.8 mg) and CH<sub>2</sub>Cl<sub>2</sub> (1 mL). The reaction mixture was cooled to -40 °C and added m-CPBA (0.4 mmol, 69.0 mg, 4.0 equiv). The was stirred at -40°C overnight. The reaction mixture was purified by flash column chromatography (silica gel, Petroleum ether/EtOAc, 10:1, v/v) to afford the product **4** (0.095 mmol, 37.1 mg) in 95% yield and 92% *ee*.

**d) Stereochemistry determination 4 via X-ray crystallographic analysis**

Product **4** was crystallized as a colorless crystal *via* vaporization of a hexane/Dichloromethane solution, and its absolute configuration was determined by x-ray structure analysis. CCDC 2044606 (DOI: [10.5517/ccdc.csd.cc26ml1h](https://doi.org/10.5517/ccdc.csd.cc26ml1h)) contains the supplementary crystallographic data that can be obtained free of charge from The Cambridge Crystallographic Data Centre via [www.ccdc.cam.ac.uk/data\\_request/cif](http://www.ccdc.cam.ac.uk/data_request/cif).

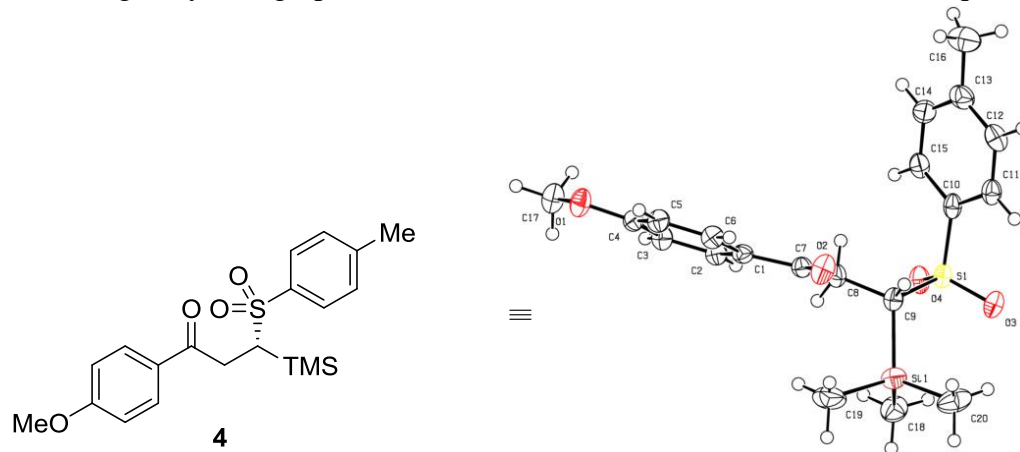

### III. Characterizations of products, reference

Structures of known compounds were confirmed by NMR spectral comparison with literature datas. The compound not reported before,  $^1\text{H}$  NMR and  $^{13}\text{C}$  NMR characterization and the corresponding spectra are provided.

#### a) Characterizations of Products

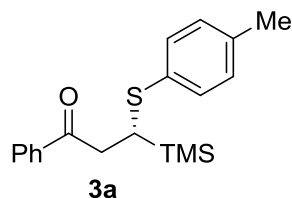

**(S)-1-phenyl-3-(p-tolylthio)-3-(trimethylsilyl)propan-1-one (3a):** colorless oil;  $[\alpha]_{\text{D}}^{23}$  (c 0.372,  $\text{CHCl}_3$ ) = +18.8;  $^1\text{H}$  NMR (400 MHz,  $\text{CDCl}_3$ )  $\delta$  = 0.13 (s, 9H), 2.26 (s, 3H), 3.18 (dd,  $J$  = 17.6, 4.4 Hz, 1H), 3.26-3.29 (m, 1H), 3.36-3.42 (m, 1H), 7.02 (d,  $J$  = 8.0 Hz, 2H), 7.24 (d,  $J$  = 8.0 Hz, 2H), 7.41 (t,  $J$  = 8.0 Hz, 2H), 7.52 (t,  $J$  = 7.6 Hz, 1H), 7.82-7.85 (m, 2H);  $^{13}\text{C}$  NMR (100 MHz,  $\text{CDCl}_3$ )  $\delta$  = -2.2, 21.1, 28.2, 41.2, 128.1, 128.6, 129.8, 130.1, 132.9, 133.1, 136.2, 136.9, 199.2; HRMS(ESI) calcd for  $\text{C}_{19}\text{H}_{24}\text{OSSi}$  ( $\text{M}+\text{Na}$ ) $^+$ : 351.1209, Found: 351.1204; 92% *ee* as determined by HPLC (Chiralcel AD, 95:5 hexanes/*i*-PrOH, 0.3 mL/min),  $t_{\text{r}}$  (minor) = 14.8 min,  $t_{\text{r}}$  (major) = 15.5 min.

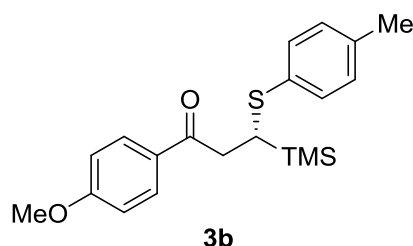

**(S)-1-(4-methoxyphenyl)-3-(p-tolylthio)-3-(trimethylsilyl)propan-1-one(3b):** colorless oil;  $[\alpha]_{\text{D}}^{23}$  (c 0.198,  $\text{CHCl}_3$ ) = +9.0;  $^1\text{H}$  NMR (400 MHz,  $\text{CDCl}_3$ )  $\delta$  = 0.13 (s, 9H), 2.23 (s, 3H), 3.15 (dd,  $J$  = 17.2, 4.4 Hz, 1H), 3.26-3.38 (m, 2H), 3.85 (s, 3H), 7.25 (dt,  $J$  = 8.4, 2.0 Hz, 2H), 7.04 (m, 2H), 7.25 (m, 2H), 7.84 (dt,  $J$  = 8.8, 2.8 Hz, 2H);  $^{13}\text{C}$  NMR (100 MHz,  $\text{CDCl}_3$ )  $\delta$  = -2.2, 21.1, 28.2, 40.7, 55.6, 113.7, 129.8, 129.9, 130.1, 130.4, 133.1, 136.1, 163.5, 197.7; HRMS(ESI) calcd for  $\text{C}_{20}\text{H}_{26}\text{O}_2\text{SSi}$  ( $\text{M}+\text{Na}$ ) $^+$ : 381.1315, Found: 381.1325; 99% *ee* as determined by HPLC (Chiralcel ADH, 95:5 hexanes/*i*-PrOH, 0.3 mL/min),  $t_{\text{r}}$  (minor) = 20.9 min,  $t_{\text{r}}$  (major) = 23.3 min.

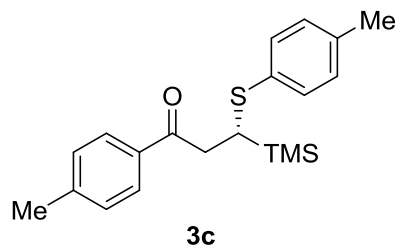

**(S)-1-(p-tolyl)-3-(p-tolylthio)-3-(trimethylsilyl)propan-1-one (3c):** colorless oil;  $[\alpha]_D^{23}$  (c 0.448,  $\text{CHCl}_3$ ) = +18.2;  $^1\text{H NMR}$  (400 MHz,  $\text{CDCl}_3$ )  $\delta$  = 0.14 (s, 9H), 2.27 (s, 3H), 2.39 (s, 3H), 3.17 (dd,  $J$  = 17.2, 4.0 Hz, 1H), 3.26-3.29 (m, 1H), 3.38 (dd,  $J$  = 17.6, 8.0 Hz, 1H), 7.03 (d,  $J$  = 8.0 Hz, 2H), 7.20-7.26 (m, 4H), 7.75 (d,  $J$  = 8.4 Hz, 2H);  $^{13}\text{C NMR}$  (100 MHz,  $\text{CDCl}_3$ )  $\delta$  = -2.2, 21.1, 21.7, 28.1, 41.0, 128.2, 129.3, 129.8, 129.9, 133.0, 134.5, 136.1, 143.9, 198.8; HRMS(ESI) calcd for  $\text{C}_{20}\text{H}_{26}\text{OSSi}$  ( $\text{M}+\text{Na}$ ) $^+$ : 365.1366, Found: 365.1366; 83% *ee* as determined by HPLC (Chiralcel ADH, 95:5 hexanes/*i*-PrOH, 0.3 mL/min),  $t_r$  (minor) = 17.1 min,  $t_r$  (major) = 18.4 min.

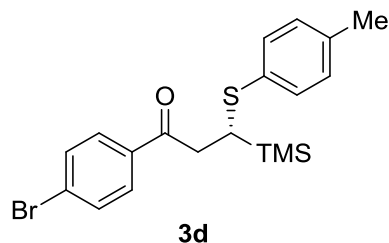

**(S)-1-(4-bromophenyl)-3-(p-tolylthio)-3-(trimethylsilyl)propan-1-one (3d):** colorless oil;  $[\alpha]_D^{23}$  (c 0.525,  $\text{CHCl}_3$ ) = +43.6;  $^1\text{H NMR}$  (400 MHz,  $\text{CDCl}_3$ )  $\delta$  = 0.13 (s, 9H), 2.26 (s, 3H), 3.23 (m, 3H), 7.03 (d,  $J$  = 6.8 Hz, 2H), 7.23 (d,  $J$  = 6.8 Hz, 2H), 7.54 (m, 4H);  $^{13}\text{C NMR}$  (100 MHz,  $\text{CDCl}_3$ )  $\delta$  = -2.7, 18.2, 34.5, 38.7, 115.6, 115.8, 130.7, 130.8, 133.4, 133.5, 164.4, 166.9, 174.1, 198.3; HRMS(ESI) calcd for  $\text{C}_{19}\text{H}_{23}^{79}\text{BrOSSi}$  ( $\text{M}+\text{Na}$ ) $^+$ : 429.0314, Found: 429.0315. HRMS(ESI) calcd for  $\text{C}_{19}\text{H}_{23}^{81}\text{BrOSSi}$  ( $\text{M}+\text{Na}$ ) $^+$ : 431.0293, Found: 431.0289; 99% *ee* as determined by HPLC (Chiralcel AZH, 99:1 hexanes/*i*-PrOH, 0.2 mL/min),  $t_r$  (major) = 13.5 min,  $t_r$  (minor) = 15.2 min.

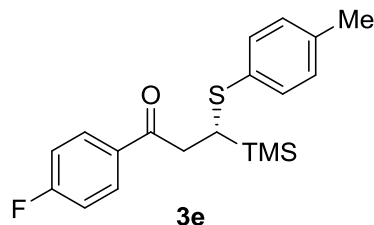

**(S)-1-(4-fluorophenyl)-3-(p-tolylthio)-3-(trimethylsilyl)propan-1-one (3e):** colorless oil;  $[\alpha]_D^{23}$  (c 0.825,  $\text{CHCl}_3$ ) = +88.5;  $^1\text{H NMR}$  (400 MHz,  $\text{CDCl}_3$ )  $\delta$  = 0.13 (s, 9H), 2.26 (s, 3H), 3.13-3.60 (m, 3H), 7.01-7.08 (m, 4H), 7.23 (d,  $J$  = 8.0 Hz, 2H), 7.83-8.00 (m, 2H);  $^{13}\text{C NMR}$  (100 MHz,  $\text{CDCl}_3$ )  $\delta$  = -2.3, 21.1, 28.4, 41.1, 115.6, 115.8, 129.8, 130.2, 130.7, 130.8, 132.8, 133.3, 133.4, 136.3, 164.50, 167.1, 197.7;  $^{19}\text{F NMR}$  (376 MHz,  $\text{CDCl}_3$ )  $\delta$  = -105.64; HRMS(ESI) calcd for  $\text{C}_{19}\text{H}_{23}\text{FNaOSSi}$

(M+Na)<sup>+</sup>: 369.1115, Found: 369.1113; 99% ee as determined by HPLC (Chiralcel AZH, 95:5 hexanes/*i*-PrOH, 0.7 mL/min), *t<sub>r</sub>* (major) = 65.2 min, *t<sub>r</sub>* (minor) = 67.3 min.

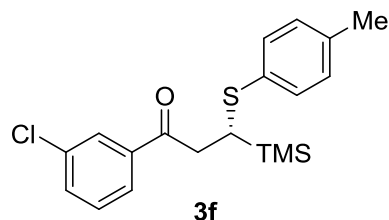

**(S)-1-(3-chlorophenyl)-3-(p-tolylthio)-3-(trimethylsilyl)propan-1-one(3f):**  
colorless oil;  $[\alpha]_D^{23}$  (c 0.712, CHCl<sub>3</sub>) = +36.0; <sup>1</sup>H NMR (400 MHz, CDCl<sub>3</sub>)  $\delta$  = 0.14 (s, 9H), 2.27 (s, 3H), 3.17 (dd, *J* = 16.8, 4.8 Hz, 1H), 3.22-3.25 (m, 1H), 3.32 (dd, *J* = 16.8, 6.8 Hz, 1H), 7.02 (d, *J* = 8 Hz, 2H), 7.22 (d, *J* = 8 Hz, 2H), 7.34 (t, *J* = 7.6 Hz, 1H), 7.48-7.50 (m, 1H), 7.69 (dt, *J* = 8.0, 1.6 Hz, 1H), 7.75 (t, *J* = 1.6 Hz, 1H); <sup>13</sup>C NMR (100 MHz, CDCl<sub>3</sub>)  $\delta$  = -2.3, 21.1, 28.6, 41.4, 126.1, 128.2, 129.8, 129.9, 130.4, 132.7, 133.0, 134.9, 136.5, 138.4, 198.1; HRMS(ESI) calcd for C<sub>19</sub>H<sub>23</sub><sup>35</sup>ClOSSI (M+Na)<sup>+</sup>: 385.0820, Found: 385.0818. HRMS(ESI) calcd for C<sub>19</sub>H<sub>23</sub><sup>37</sup>ClOSSI (M+Na)<sup>+</sup>: 387.0790, Found: 387.0791; 93% ee as determined by HPLC (Chiralcel IA, 98:2 hexanes/*i*-PrOH, 0.2 mL/min), *t<sub>r</sub>* (minor) = 22.8 min, *t<sub>r</sub>* (major) = 24.2 min.

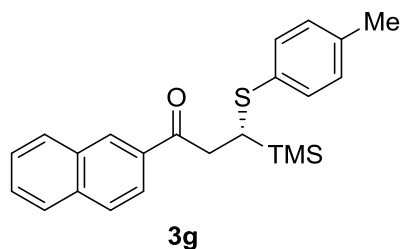

**(S)-1-(naphthalen-2-yl)-3-(p-tolylthio)-3-(trimethylsilyl)propan-1-one(3g):**  
colorless oil;  $[\alpha]_D^{23}$  (c 0.656, CHCl<sub>3</sub>) = +31.2; <sup>1</sup>H NMR (400 MHz, CDCl<sub>3</sub>)  $\delta$  = 0.17 (s, 9H), 2.25 (s, 3H), 3.31-3.37 (m, 2H), 3.49-3.56 (m, 1H), 7.03 (d, *J* = 8 Hz, 2H), 7.28 (d, *J* = 8 Hz, 2H), 7.53-7.58 (m, 2H), 7.83-7.85 (m, 2H), 7.89-7.93 (m, 2H), 8.32 (s, 1H); <sup>13</sup>C NMR (100 MHz, CDCl<sub>3</sub>)  $\delta$  = -2.2, 21.1, 28.6, 41.3, 123.9, 126.9, 127.9, 128.5, 128.6, 129.7, 129.7, 129.8, 130.2, 132.5, 132.9, 134.3, 135.6, 136.3, 199.2; HRMS(ESI) calcd for C<sub>23</sub>H<sub>26</sub>OSSI (M+H)<sup>+</sup>: 379.1546, Found: 379.1548; 95% ee as determined by HPLC (Chiralcel ADH, 99:1 hexanes/*i*-PrOH, 0.3 mL/min), *t<sub>r</sub>* (minor) = 19.1 min, *t<sub>r</sub>* (major) = 21.1 min.

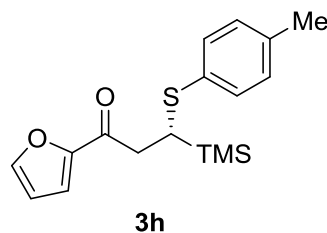

**(S)-1-(furan-2-yl)-3-(p-tolylthio)-3-(trimethylsilyl)propan-1-one (3h):**  
colorless oil;  $[\alpha]_D^{23}$  (c 0.599, CHCl<sub>3</sub>) = +37.0; <sup>1</sup>H NMR (400 MHz, CDCl<sub>3</sub>)  $\delta$  = 0.14 (s, 9H), 2.27 (s, 3H), 3.02-3.09 (m, 1H), 3.18-3.25 (m, 2H), 6.49 (q, *J* = 1.6 Hz, 1H),

7.03 (d,  $J = 7.6$  Hz, 2H), 7.08 (dd,  $J = 3.6, 0.8$  Hz, 1H), 7.23-7.26 (m, 2H), 7.53 (dd,  $J = 1.6, 0.8$  Hz, 1H);  $^{13}\text{C}$  NMR (100 MHz,  $\text{CDCl}_3$ )  $\delta = -2.3, 21.1, 28.6, 40.8, 112.3, 117.2, 129.7, 130.4, 132.8, 136.3, 146.4, 152.7, 188.3$ ; HRMS(ESI) calcd for  $\text{C}_{17}\text{H}_{22}\text{O}_2\text{SSi}$  ( $\text{M}+\text{H}$ ) $^+$ : 319.1183, Found: 319.1186; 91% *ee* as determined by HPLC (Chiralcel ADH, 95:5 hexanes/*i*-PrOH, 0.3 mL/min),  $t_r$  ((minor) = 17.3 min,  $t_r$  (major) = 20.1 min.

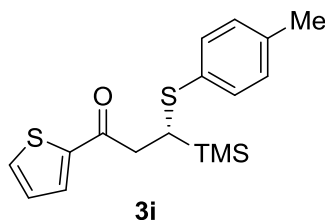

**(S)-1-(thiophen-2-yl)-3-(p-tolylthio)-3-(trimethylsilyl)propan-1-one (3i):** colorless oil;  $[\alpha]_{\text{D}}^{23}$  (c 0.235,  $\text{CHCl}_3$ ) = +11.8;  $^1\text{H}$  NMR (400 MHz,  $\text{CDCl}_3$ )  $\delta = 0.15$  (s, 9H), 2.27 (s, 3H), 3.13 (dd,  $J = 16, 4.4$  Hz, 1H), 3.21-3.32 (m, 2H), 7.03 (d,  $J = 7.6$  Hz, 2H), 7.08 (dd,  $J = 4.8, 4$  Hz, 1H), 7.24-7.27 (m, 2H), 7.60-7.61 (m, 2H);  $^{13}\text{C}$  NMR (100 MHz,  $\text{CDCl}_3$ )  $\delta = -2.3, 21.1, 28.8, 41.7, 128.1, 129.8, 130.3, 131.9, 132.7, 133.8, 136.3, 144.3, 192.0$ ; HRMS(ESI) calcd for  $\text{C}_{17}\text{H}_{22}\text{OS}_2\text{Si}$  ( $\text{M}+\text{Na}$ ) $^+$ : 357.0774, Found: 357.0776; 94% *ee* as determined by HPLC (Chiralcel IA, 99:1 hexanes/*i*-PrOH, 0.2 mL/min),  $t_r$  (major) = 38.5 min,  $t_r$  (minor) = 41.4 min.

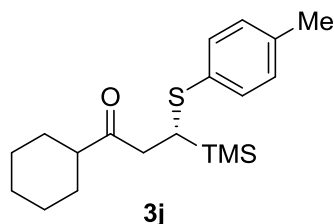

**(S)-1-cyclohexyl-3-(p-tolylthio)-3-(trimethylsilyl)propan-1-one (3j):** colorless oil;  $[\alpha]_{\text{D}}^{23}$  (c 0.674,  $\text{CHCl}_3/\text{CHCl}_3$ ) = +54.5;  $^1\text{H}$  NMR (400 MHz,  $\text{CDCl}_3$ )  $\delta = 0.09$  (s, 9H), 1.12-1.32 (m, 6H), 1.59-1.75 (m, 5H), 2.28 (s, 3H), 2.69 (dd,  $J = 18.4, 4.2$  Hz, 1H), 2.81 (dd,  $J = 18.4, 7.2$  Hz, 1H), 3.05 (dd,  $J = 7.2, 5.2$  Hz, 1H), 7.05 (d,  $J = 8.0$  Hz, 2H), 7.21 (d,  $J = 8.0$  Hz, 2H);  $^{13}\text{C}$  NMR (100 MHz,  $\text{CDCl}_3$ )  $\delta = -2.3, 21.1, 25.7, 25.8, 25.9, 26.0, 27.2, 28.5, 28.6, 43.2, 51.1, 129.7, 129.8, 129.8, 133.2, 136.0, 162.8$ ; HRMS(ESI) calcd for  $\text{C}_{19}\text{H}_{30}\text{OSSi}$  ( $\text{M}+\text{Na}$ ) $^+$ : 357.1679, Found: 357.1679; 83% *ee* as determined by HPLC (Chiralcel IA, 95:5 hexanes/*i*-PrOH, 0.3 mL/min),  $t_r$  (minor) = 12.5 min,  $t_r$  (major) = 13.2 min.

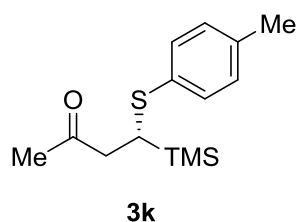

**(S)-4-(p-tolylthio)-4-(trimethylsilyl)butan-2-one (3k):** colorless oil;  $[\alpha]_{\text{D}}^{23}$  (c 0.375,  $\text{CHCl}_3$ ) = +35.2;  $^1\text{H}$  NMR (400 MHz,  $\text{CDCl}_3$ )  $\delta = 0.10$  (s, 9H), 2.04 (s, 3H),



2.29 (s, 3H), 2.64-2.82 (m, 2H), 3.00-3.03 (m, 1H), 7.06 (d,  $J = 8.0$  Hz, 1H), 7.23-7.25 (m, 1H);  $^{13}\text{C}$  NMR (100 MHz,  $\text{CDCl}_3$ )  $\delta = -2.5, 21.1, 27.9, 30.4, 46.0, 129.8, 130.2, 133.0, 136.3, 207.7$ ; HRMS(ESI) calcd for  $\text{C}_{14}\text{H}_{22}\text{OSSi}$  ( $\text{M}+\text{Na}$ ) $^+$ : 289.1053, Found: 289.1047; 62% ee as determined by HPLC (Chiralcel ADH, 98:2 hexanes/*i*-PrOH, 0.5 mL/min),  $t_r$  (minor) = 9.0 min,  $t_r$  (major) = 10.3 min

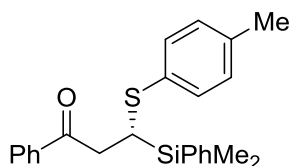

**3l**

**(S)-3-(dimethyl(phenyl)silyl)-1-phenyl-3-(p-tolylthio)propan-1-one (3l):** colorless oil;  $[\alpha]_{\text{D}}^{23}$  (c 0.302,  $\text{CHCl}_3$ ) = +10.4;  $^1\text{H}$  NMR (400 MHz,  $\text{CDCl}_3$ )  $\delta = 0.44$  (d,  $J = 1.6$  Hz, 6H), 2.25 (s, 3H), 3.14 (dd,  $J = 17.6, 5.2$  Hz, 1H), 3.30-3.37 (m, 1H), 3.43-3.46 (dd,  $J = 7.2, 5.2$  Hz, 1H), 7.20-7.23 (m, 2H), 7.30-7.37 (m, 5H), 7.49 (tt,  $J = 7.2, 1.2$  Hz, 1H), 7.57-7.60 (m, 2H), 7.70-7.71 (m, 2H);  $^{13}\text{C}$  NMR (100 MHz,  $\text{CDCl}_3$ )  $\delta = -4.0, -3.5, 21.1, 28.5, 41.3, 127.9, 128.0, 128.5, 129.6, 129.8, 130.5, 132.9, 133.0, 134.3, 136.4, 136.5, 136.9, 199.0$ ; HRMS(ESI) calcd for  $\text{C}_{24}\text{H}_{26}\text{OSSi}$  ( $\text{M}+\text{Na}$ ) $^+$ : 413.1366, Found: 413.1368; 83% ee as determined by HPLC (Chiralcel AD, 95:5 hexanes/*i*-PrOH, 0.3 mL/min),  $t_r$  (major) = 18.3 min,  $t_r$  (minor) = 21.0 min.

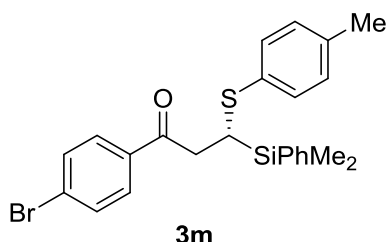

**3m**

**(S)-1-(4-bromophenyl)-3-(dimethyl(phenyl)silyl)-3-(p-tolylthio)propan-1-one (3m):** colorless oil;  $[\alpha]_{\text{D}}^{23}$  (c 0.765,  $\text{CHCl}_3$ ) = +61.7;  $^1\text{H}$  NMR (400 MHz,  $\text{CDCl}_3$ )  $\delta = 0.37$  (s, 6H), 2.18 (s, 3H), 3.03-3.09 (m, 1H), 3.27 (dd,  $J = 17.6, 7.2$  Hz, 1H), 3.36-3.39 (m, 1H), 6.92 (d,  $J = 8.0$  Hz, 2H), 7.14 (d,  $J = 8.0$  Hz, 2H), 7.25-7.28 (m, 4H), 7.40-7.43 (m, 1H), 7.50-7.52 (m, 2H), 7.63 (d,  $J = 7.6$  Hz, 2H);  $^{13}\text{C}$  NMR (100 MHz,  $\text{CDCl}_3$ )  $\delta = -4.0, -3.5, 21.1, 28.3, 29.8, 41.2, 128.0, 128.0, 128.5, 128.6, 129.6, 129.8, 129.9, 130.4, 132.9, 133.0, 134.3, 136.4, 136.5, 136.9, 199.1$ ; HRMS(ESI) calcd for  $\text{C}_{24}\text{H}_{25}^{79}\text{BrOSSi}$  ( $\text{M}+\text{Na}$ ) $^+$ : 491.0471, Found: 491.0472. HRMS(ESI) calcd for  $\text{C}_{24}\text{H}_{25}^{81}\text{BrOSSi}$  ( $\text{M}+\text{Na}$ ) $^+$ : 493.0450, Found: 493.0455; 86% ee as determined by HPLC (Chiralcel ADH, 95:5 hexanes/*i*-PrOH, 0.3 mL/min),  $t_r$  (major) = 21.7 min,  $t_r$  (minor) = 29.4 min.

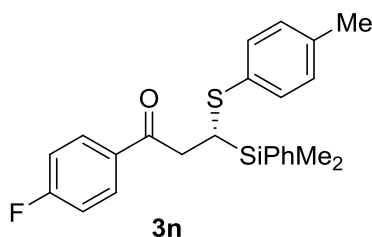

**(S)-3-(dimethyl(phenyl)silyl)-1-(4-fluorophenyl)-3-(p-tolylthio)propan-1-one (3n):** colorless oil;  $[\alpha]_D^{23}$  (c 0.375,  $\text{CHCl}_3$ ) = +56.5;  $^1\text{H NMR}$  (400 MHz,  $\text{CDCl}_3$ )  $\delta$  = 0.44 (s, 6H), 2.25 (s, 3H), 3.08 (dd,  $J$  = 17.6, 5.6 Hz, 1H), 3.24-3.30 (m, 1H), 3.41 (dd,  $J$  = 7.2, 5.6 Hz, 1H), 6.99-7.03 (m, 4H), 7.20 (d,  $J$  = 8.0 Hz, 2H), 7.30-7.34 (m, 3H), 7.56-7.58 (m, 2H), 7.68-7.72 (m, 2H);  $^{13}\text{C NMR}$  (100 MHz,  $\text{CDCl}_3$ )  $\delta$  = -4.2, -3.5, 21.1, 28.6, 41.1, 115.4, 115.6, 127.9, 129.6, 129.8, 130.5, 130.6, 130.7, 134.3, 136.4, 136.5, 197.5;  $^{19}\text{F NMR}$  (376 MHz,  $\text{CDCl}_3$ )  $\delta$  = -105.64; HRMS(ESI) calcd for  $\text{C}_{24}\text{H}_{25}\text{FOSSi}$  ( $\text{M}+\text{Na}$ ) $^+$ : 431.1272, Found: 431.1270; 90% *ee* as determined by HPLC (Chiralcel IA, 99:1 hexanes/*i*-PrOH, 0.2 mL/min),  $t_r$  (minor) = 36.1 min,  $t_r$  (major) = 52.2 min.

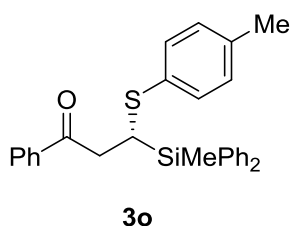

**(S)-3-(methyldiphenylsilyl)-1-phenyl-3-(p-tolylthio)propan-1-one (3o):** colorless oil;  $[\alpha]_D^{23}$  (c 0.564,  $\text{CHCl}_3$ ) = +20.0;  $^1\text{H NMR}$  (400 MHz,  $\text{CDCl}_3$ )  $\delta$  = 0.72 (s, 3H), 2.24 (s, 3H), 3.24 (dd,  $J$  = 17.6, 6.0 Hz, 1H), 3.38-3.44 (m, 1H), 3.86 (t,  $J$  = 12.4, 6.4 Hz, 1H), 6.96 (d,  $J$  = 8 Hz, 2H), 7.20 (d,  $J$  = 8 Hz, 2H), 7.30-7.39 (m, 8H), 7.45-7.49 (m, 1H), 7.61-7.68 (m, 6H);  $^{13}\text{C NMR}$  (100 MHz,  $\text{CDCl}_3$ )  $\delta$  = -4.7, 21.1, 27.3, 41.6, 128.0, 128.0, 128.4, 129.7, 129.8, 130.8, 132.8, 132.9, 135.2, 135.2, 136.5, 136.9, 198.7; HRMS(ESI) calcd for  $\text{C}_{29}\text{H}_{28}\text{OSSi}$  ( $\text{M}+\text{H}$ ) $^+$ : 453.1703, Found: 453.1700; 90% *ee* as determined by HPLC (Chiralcel AD, 95:5 hexanes/*i*-PrOH, 0.3 mL/min),  $t_r$  (major) = 22.6 min,  $t_r$  (minor) = 33.5 min.

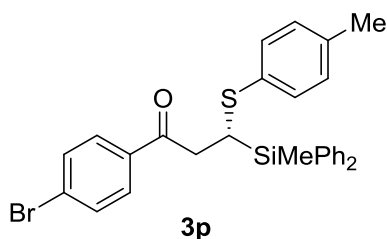

**(S)-1-(4-bromophenyl)-3-(methyldiphenylsilyl)-3-(p-tolylthio)propan-1-one (3p):** colorless oil;  $[\alpha]_D^{23}$  (c 0.220,  $\text{CHCl}_3$ ) = +55.3;  $^1\text{H NMR}$  (400 MHz,  $\text{CDCl}_3$ )  $\delta$  = 0.72 (s, 3H), 2.24 (s, 3H), 3.24 (dd,  $J$  = 17.6, 6.0 Hz, 1H), 3.38-3.44 (m, 1H), 3.86 (t,  $J$  = 12.4, 6.4 Hz, 1H), 6.96 (d,  $J$  = 8 Hz, 2H), 7.20 (d,  $J$  = 8.0 Hz, 2H), 7.30-7.39 (m, 7H), 7.45-7.49 (m, 1H), 7.61-7.68 (m, 6H);  $^{13}\text{C NMR}$  (100 MHz,  $\text{CDCl}_3$ )  $\delta$  = -4.7, 21.1, 27.3, 41.6, 127.9, 128.0, 128.4, 129.7, 129.8, 130.8, 132.8, 132.9, 135.2, 135.2,

136.5, 136.9, 198.7; HRMS(ESI) calcd for  $C_{29}H_{27}^{79}BrOSSI$  ( $M+Na$ )<sup>+</sup>: 553.0627, Found: 553.0625. HRMS(ESI) calcd for  $C_{29}H_{27}^{81}BrOSSI$  ( $M+Na$ )<sup>+</sup>: 555.0606, Found: 555.0605; 90% *ee* as determined by HPLC (Chiralcel AD, 95:5 hexanes/*i*-PrOH, 1.0 mL/min),  $t_r$  (major) = 8.1 min,  $t_r$  (minor) = 17.4 min.

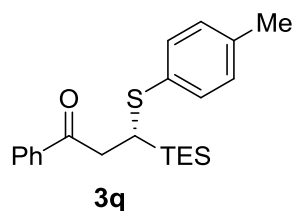

**(S)-1-phenyl-3-(p-tolylthio)-3-(triethylsilyl)propan-1-one (3q):** colorless oil;  $[\alpha]_D^{23}$  (c 0.420,  $CHCl_3$ ) = +45.3;  $^1H$  NMR (400 MHz,  $CDCl_3$ )  $\delta$  = 0.69 (q,  $J$  = 8.0 Hz, 6H), 1.01 (t,  $J$  = 8.0 Hz, 9H), 2.25 (s, 3H), 3.19-3.27 (m, 1H), 3.37-3.46 (m, 2H), 7.00 (d,  $J$  = 4.0 Hz, 2H), 7.22 (d,  $J$  = 8.0 Hz, 2H), 7.31-7.41 (m, 2H), 7.49-7.54 (m, 1H), 7.79-7.82 (m, 2H);  $^{13}C$  NMR (100 MHz,  $CDCl_3$ )  $\delta$  = 2.8, 7.7, 21.1, 25.6, 41.7, 128.1, 128.2, 128.6, 129.7, 130.1, 133.0, 133.1, 136.1, 136.9, 199.1; HRMS(ESI) calcd for  $C_{22}H_{31}OSSI^+$  ( $M+H$ )<sup>+</sup>: 371.1859, Found: 371.1860. 96% *ee* as determined by HPLC (Chiralcel OJH, 99:1 hexanes/*i*-PrOH, 0.2 mL/min),  $t_r$  (major) = 32.4 min,  $t_r$  (minor) = 35.1 min.

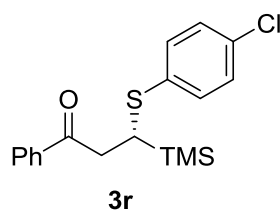

**(S)-3-((4-chlorophenyl)thio)-1-phenyl-3-(trimethylsilyl)propan-1-one (3r):** colorless oil;  $[\alpha]_D^{23}$  (c 0.764,  $CHCl_3$ ) = +37.9;  $^1H$  NMR (400 MHz,  $CDCl_3$ )  $\delta$  = 0.13 (s, 9H), 3.16 (dd,  $J$  = 17.6, 7.6 Hz, 1H), 3.30 (dd,  $J$  = 7.2, 4.8 Hz, 1H), 3.41 (dd,  $J$  = 17.6, 7.6 Hz, 1H), 7.16 (d,  $J$  = 8.4 Hz, 2H), 7.25 (d,  $J$  = 8.4 Hz, 2H), 7.42 (t,  $J$  = 7.6 Hz, 2H), 7.52-7.56 (m, 1H), 7.84 (d,  $J$  = 7.6 Hz, 2H);  $^{13}C$  NMR (100 MHz,  $CDCl_3$ )  $\delta$  = -2.3, 27.8, 41.0, 128.1, 128.7, 129.1, 130.6, 132.0, 133.3, 135.4, 136.7, 199.0; HRMS(ESI) calcd for  $C_{18}H_{21}^{35}ClNaOSSI^+$  ( $M+Na$ )<sup>+</sup>: 371.0663, Found: 371.0662. HRMS(ESI) calcd for  $C_{18}H_{21}^{37}ClNaOSSI^+$  ( $M+Na$ )<sup>+</sup>: 373.0633, Found: 373.0628; 25% *ee* as determined by HPLC (Chiralcel AZH, 99:1 hexanes/*i*-PrOH, 0.2 mL/min),  $t_r$  (major) = 31.5 min,  $t_r$  (minor) = 35.3 min.

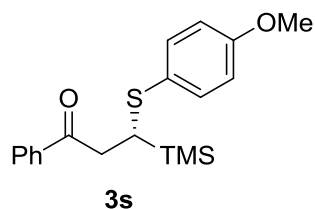

**(S)-3-((4-methoxyphenyl)thio)-1-phenyl-3-(trimethylsilyl)propan-1-one (3s):** colorless liquid;  $[\alpha]_D^{23}$  (c 0.375,  $CHCl_3$ ) = +56.1;  $^1H$  NMR (400 MHz,  $CDCl_3$ )  $\delta$  = 0.13 (s, 9H), 3.13-3.21 (m, 2H), 3.29-3.35 (m, 1H), 3.74 (s, 1H), 6.75 (d,  $J$  = 8.4 Hz,

2H), 7.31 (d,  $J = 8.0$  Hz, 2H), 7.39-7.42 (m, 2H), 7.52 (t,  $J = 7.2$  Hz, 2H), 7.81 (d,  $J = 7.6$  Hz, 2H);  $^{13}\text{C}$  NMR (100 MHz,  $\text{CDCl}_3$ )  $\delta = -2.2, 30.1, 41.1, 55.4, 114.6, 126.8, 128.1, 128.6, 132.8, 133.1, 133.3, 136.9, 159.0, 199.3$ ; HRMS(ESI) calcd for  $\text{C}_{19}\text{H}_{24}\text{O}_2\text{SSi}$  ( $\text{M}+\text{H}$ ) $^+$ : 345.1339, Found: 345.1340; 85% *ee* as determined by HPLC (Chiralcel IA, 99:1 hexanes/*i*-PrOH, 0.2 mL/min),  $t_r$ (major) = 47.7 min,  $t_r$ (minor) = 57.9 min.

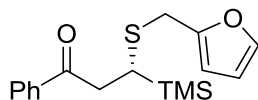

**3t**

**(S)-3-((furan-2-ylmethyl)thio)-1-phenyl-3-(trimethylsilyl)propan-1-one (3t):** colorless oil;  $[\alpha]_D^{23}$  (c 0.556,  $\text{CHCl}_3$ ) = +41.1;  $^1\text{H}$  NMR (400 MHz,  $\text{CDCl}_3$ )  $\delta = 0.18$  (s, 9H), 2.62 (dd,  $J = 6.8, 6.0$  Hz, 1H), 3.26-3.28 (m, 2H), 3.65 (d,  $J = 14.4$  Hz, 1H), 3.81 (d,  $J = 14.4$  Hz, 1H), 6.15-7.23 (m, 2H), 7.28-7.29 (m, 1H), 7.45-7.49 (m, 2H), 7.55-7.59 (m, 1H), 7.94-7.96 (m, 2H);  $^{13}\text{C}$  NMR (100 MHz,  $\text{CDCl}_3$ )  $\delta = -2.7, 25.1, 30.4, 42.2, 108.0, 110.5, 128.2, 128.7, 133.22, 137.2, 142.1, 151.7, 199.7$ ; HRMS(ESI) calcd for  $\text{C}_{17}\text{H}_{22}\text{O}_2\text{SSi}$  ( $\text{M}+\text{Na}$ ) $^+$ : 341.1002, Found: 341.1005; 25% *ee* as determined by HPLC (Chiralcel ADH, 99:1 hexanes/*i*-PrOH, 0.2 mL/min),  $t_r$ (minor) = 41.4 min,  $t_r$ (major) = 44.4 min.

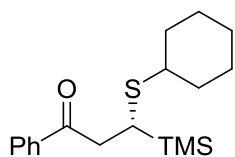

**3u**

**(S)-3-(cyclohexylthio)-1-phenyl-3-(trimethylsilyl)propan-1-one (3u):** colorless oil;  $[\alpha]_D^{23}$  (c 0.343,  $\text{CHCl}_3$ ) = +42.1;  $^1\text{H}$  NMR (400 MHz,  $\text{CDCl}_3$ )  $\delta = 0.09$  (s, 9H), 1.20-1.24 (m, 5H), 1.53-1.56 (m, 1H), 1.67-1.79 (m, 3H), 2.00-2.05 (m, 1H), 2.57-2.62 (m, 1H), 2.74 (t,  $J = 6.4$  Hz, 1H), 7.31 (dd,  $J = 6.4$  Hz,  $J = 2.4$  Hz, 2H), 7.45-7.49 (m, 2H), 7.55-7.59 (m, 1H), 7.96-7.98 (m, 2H);  $^{13}\text{C}$  NMR (100 MHz,  $\text{CDCl}_3$ )  $\delta = -2.5, 23.5, 25.9, 26.0, 26.3, 33.5, 33.9, 42.9, 44.6, 128.2, 128.7, 133.2, 137.3, 199.9$ ; HRMS(ESI) calcd for  $\text{C}_{18}\text{H}_{28}\text{OSSi}$  ( $\text{M}+\text{H}$ ) $^+$ : 320.1630, Found: 320.1621; 99% *ee* as determined by HPLC (Chiralcel ASH, 98:2 hexanes/*i*-PrOH, 0.2 mL/min),  $t_r$ (major) = 24.3 min.

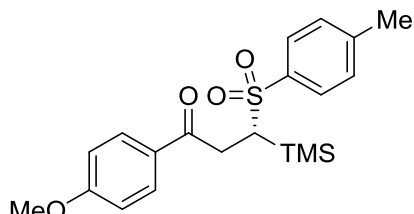

**4**

**(S)-1-(4-methoxyphenyl)-3-tosyl-3-(trimethylsilyl)propan-1-one (4):** white solid;  $[\alpha]_D^{23}$  (c 1.025,  $\text{CHCl}_3$ ) = +66.4;  $^1\text{H}$  NMR (400 MHz,  $\text{CDCl}_3$ )  $\delta = 0.28$  (s, 9H), 2.31 (s, 3H), 3.17 (dd,  $J = 18.4, 6.0$  Hz, 1H), 3.31 (dd,  $J = 18.8, 5.2$  Hz, 1H), 3.82 (dd,  $J =$

6.0, 5.2 Hz, 1H), 3.85 (s, 3H), 6.85-6.89 (m, 2H), 7.17 (d,  $J = 7.6$  Hz, 2H), 7.68-7.70 (m, 2H), 7.73-7.77 (m, 2H);  $^{13}\text{C}$  NMR (100 MHz,  $\text{CDCl}_3$ )  $\delta = -1.0, 21.6, 34.8, 50.2, 55.6, 113.8, 128.1, 129.0, 129.7, 130.3, 137.5, 143.9, 163.9, 193.9$ ; HRMS(ESI) calcd for  $\text{C}_{20}\text{H}_{26}\text{O}_4\text{SSi}$  ( $\text{M}+\text{Na}$ ) $^+$ : 413.1213, Found: 413.1213; 92% *ee* as determined by HPLC (Chiralcel ODH, 98:2 hexanes/*i*-PrOH, 0.5 mL/min),  $t_r$ (major) = 59.2 min,  $t_r$ (minor) = 80.1 min.

## b) References

- (1) A. Mizuno, H. Kusama, N. Iwasawa, *Angew. Chem. Int. Ed.*, 2009, **48**, 8318-8320.
- (2) Y. Horino, Y. Takahashi, K. Koketsu, H. Abe, K. Tsuge, *Org. Lett.*, 2014, **16**, 3184-3187.
- (3) J. Robichaud, F. Tremblay, *Org. Lett.*, 2006, **8**, 597-600.
- (4) R. Shintani, K. Okamoto, T. Hayashi, *Org. Lett.*, 2005, **7**, 4757-4759.
- (5) Y. X. Zhang, J. Huang, Y. Y. Guo, L. Li, Z. Q. Fu, W. Huang, *Angew. Chem. Int. Ed.* 2018, **57**, 4594-4598.

IV:  $^1\text{H}$ ,  $^{13}\text{C}$ ,  $^{19}\text{F}$  NMR and HPLC dates of products

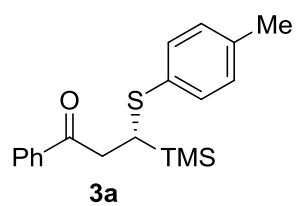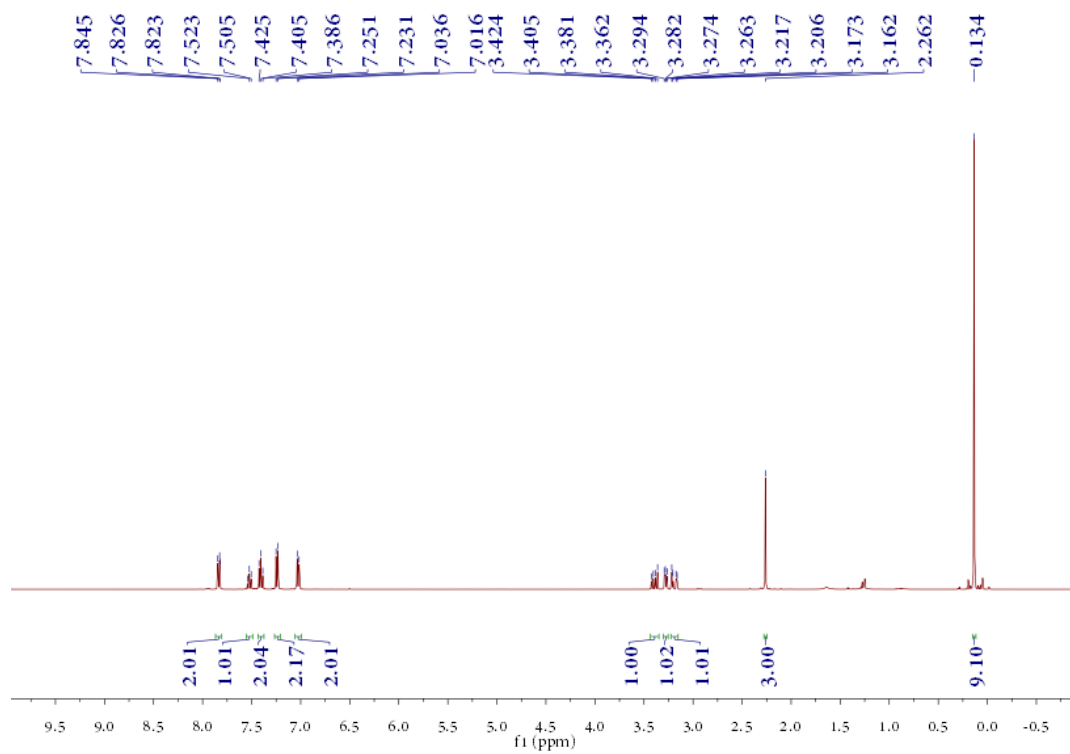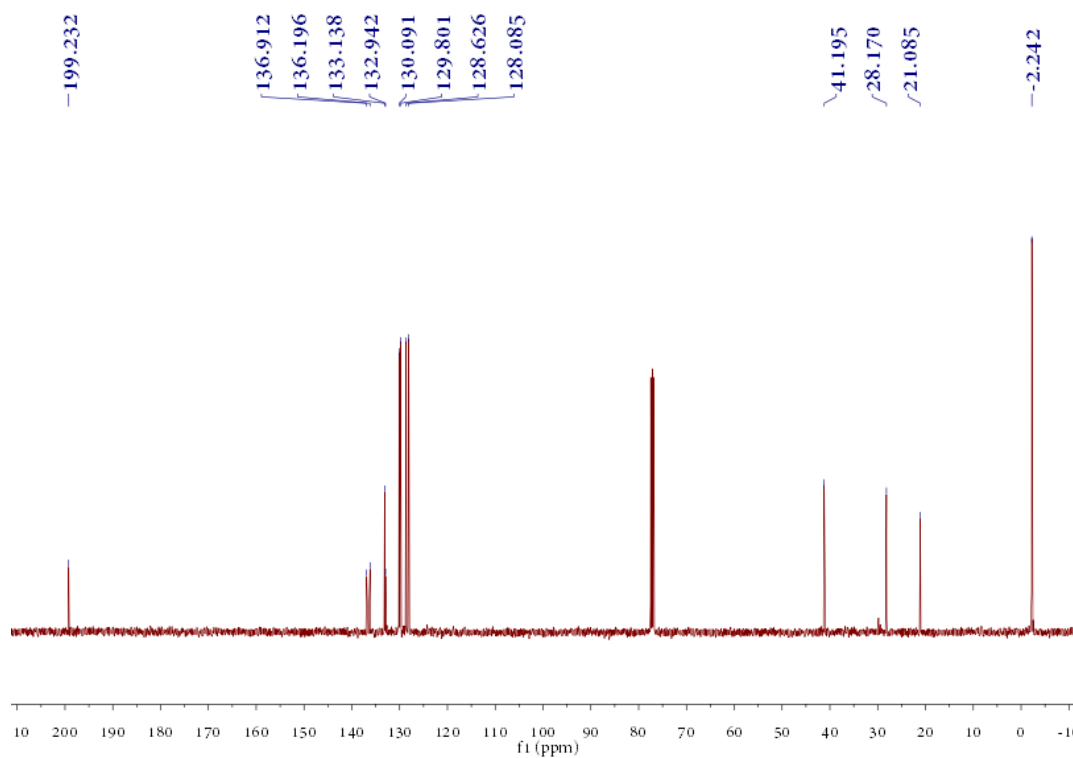

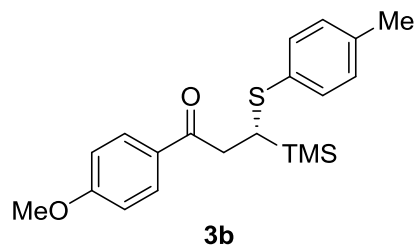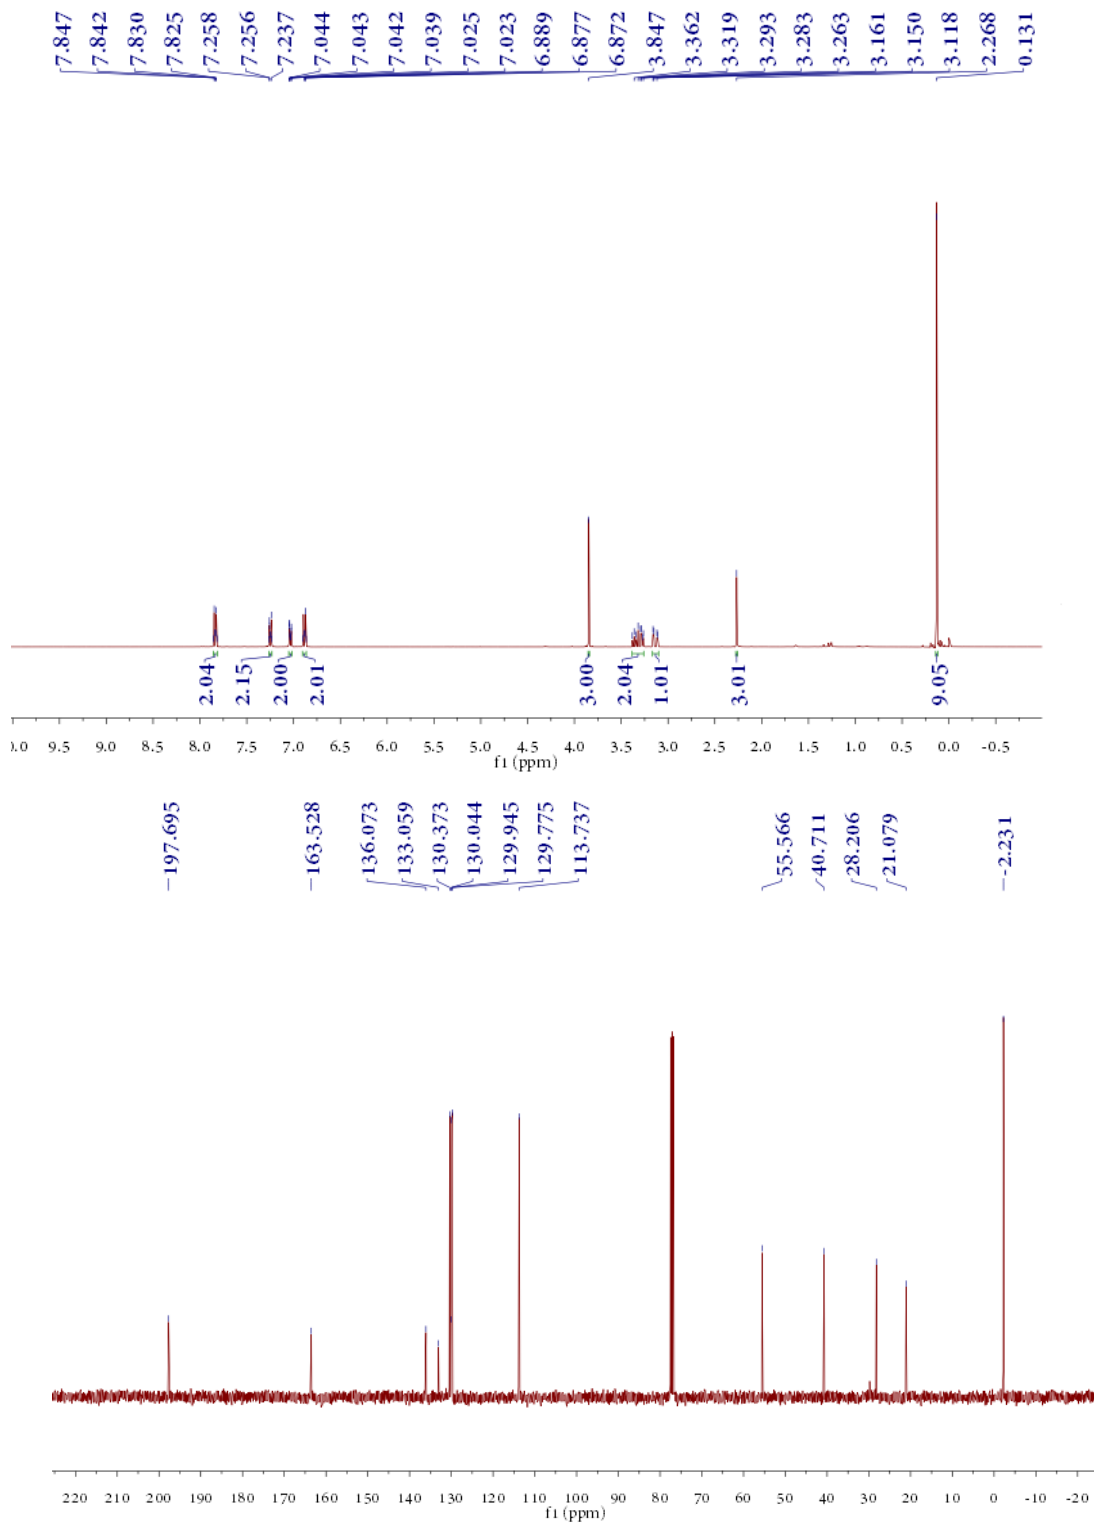

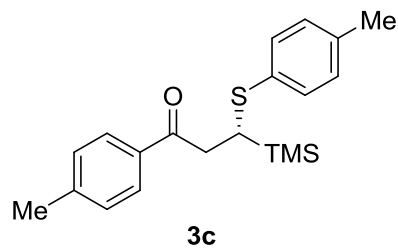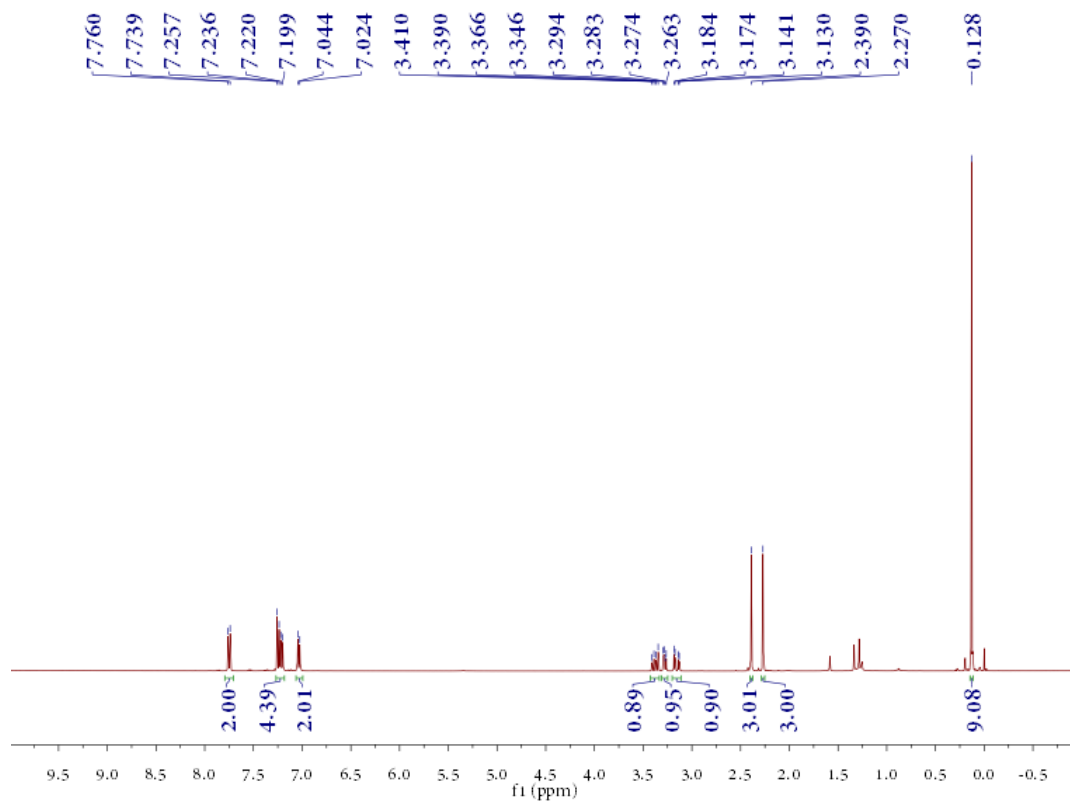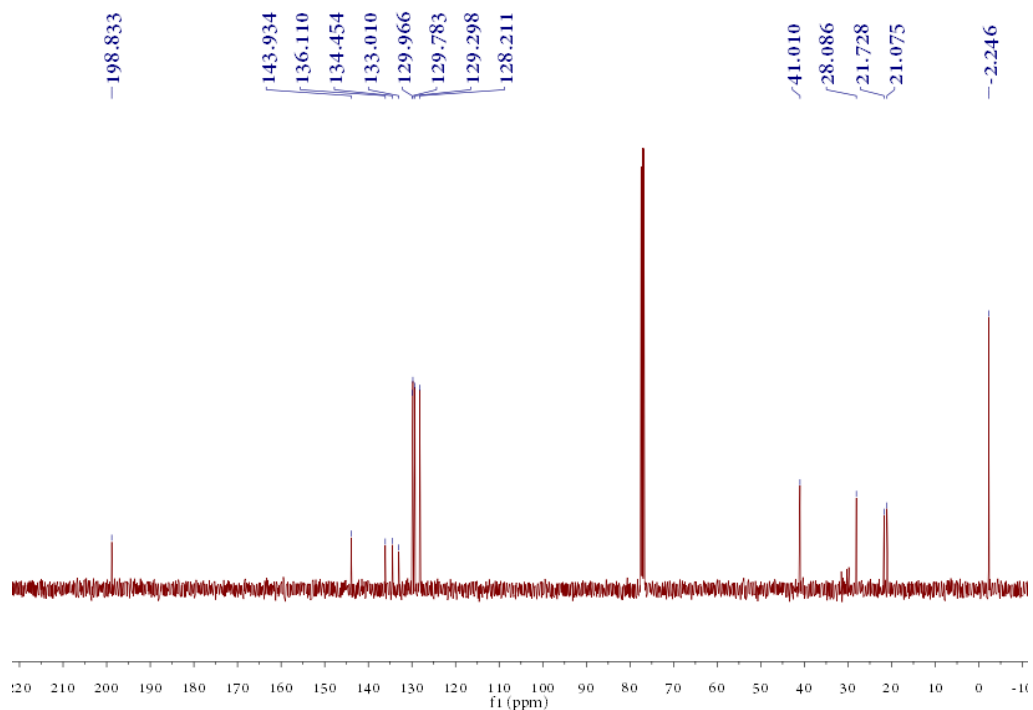



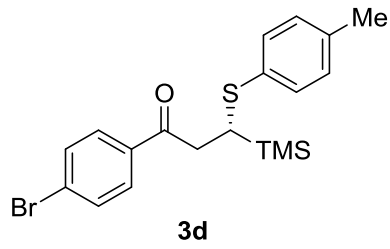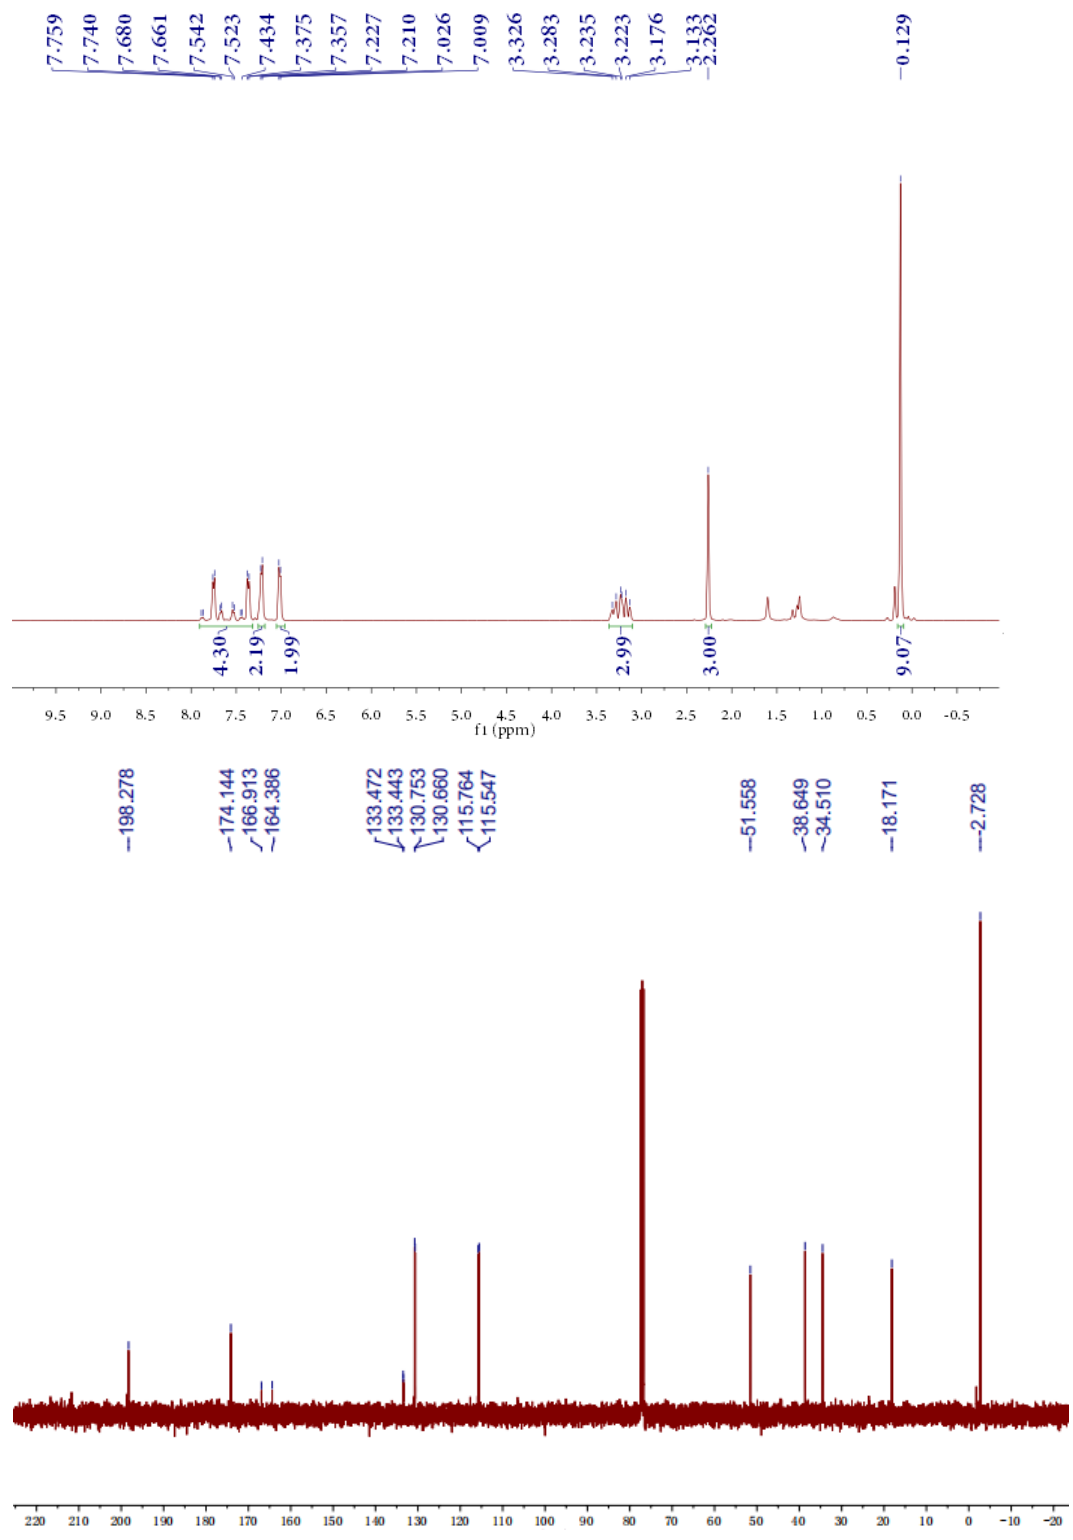

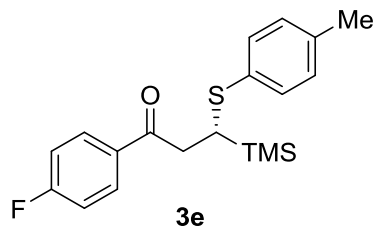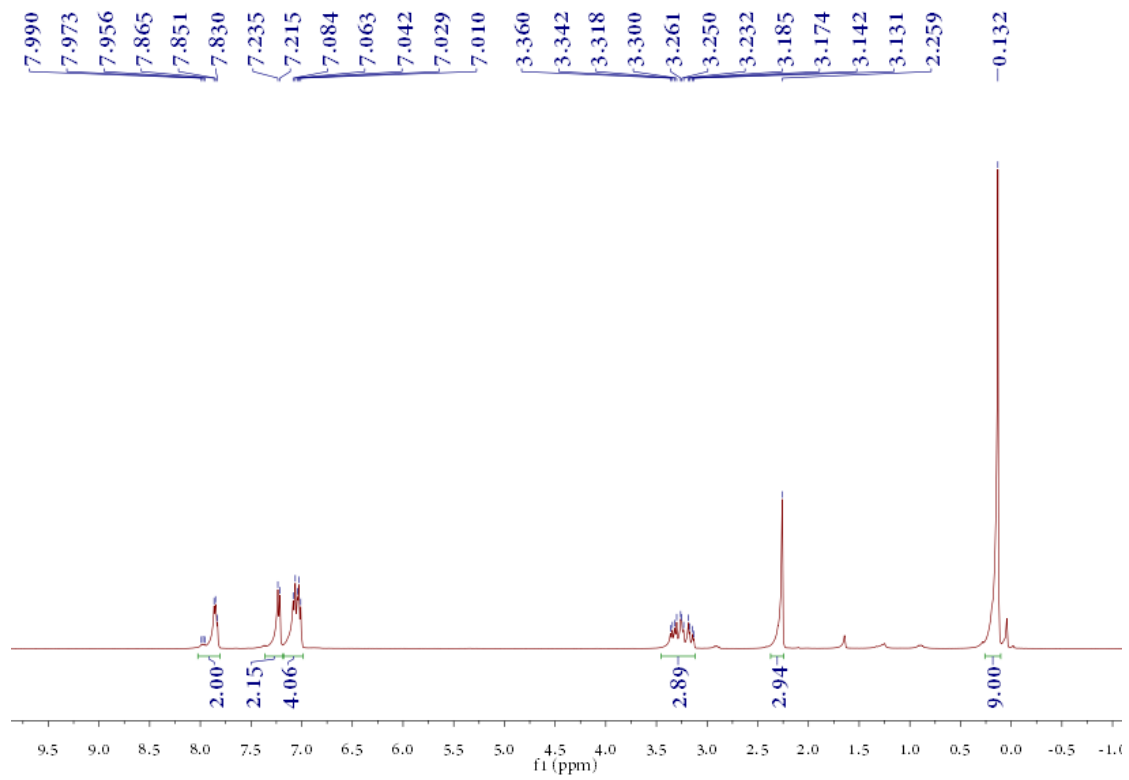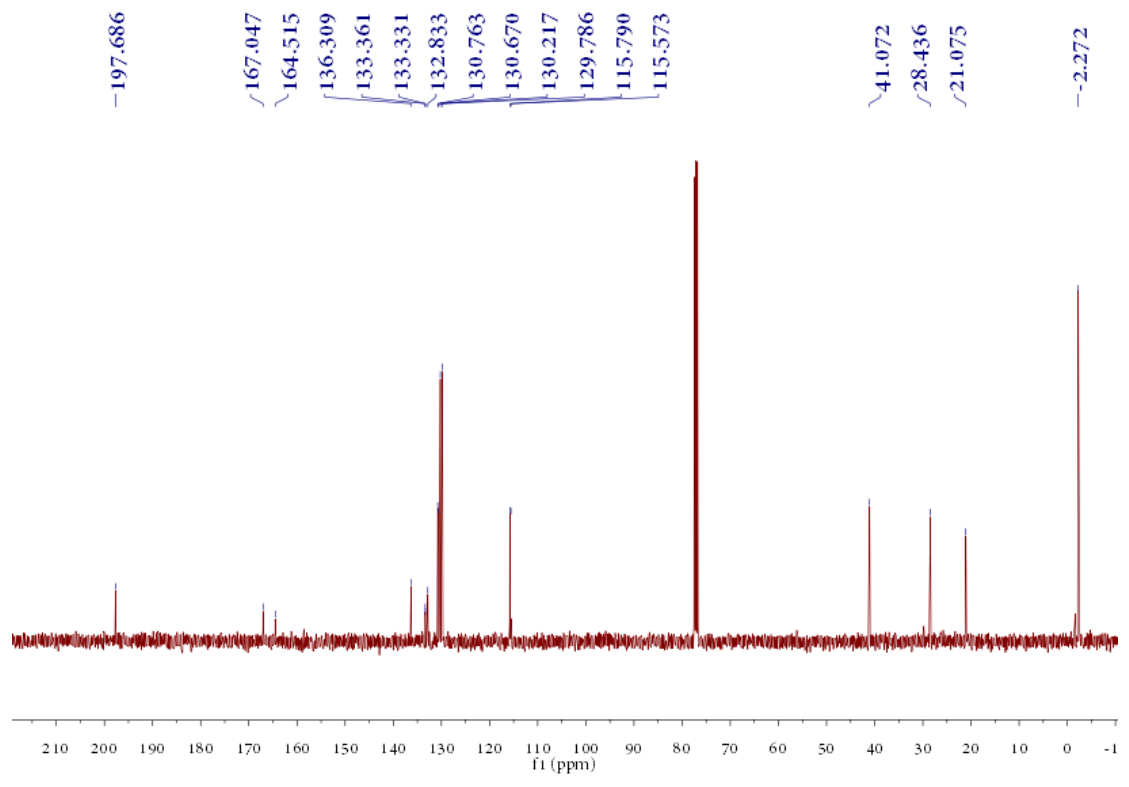

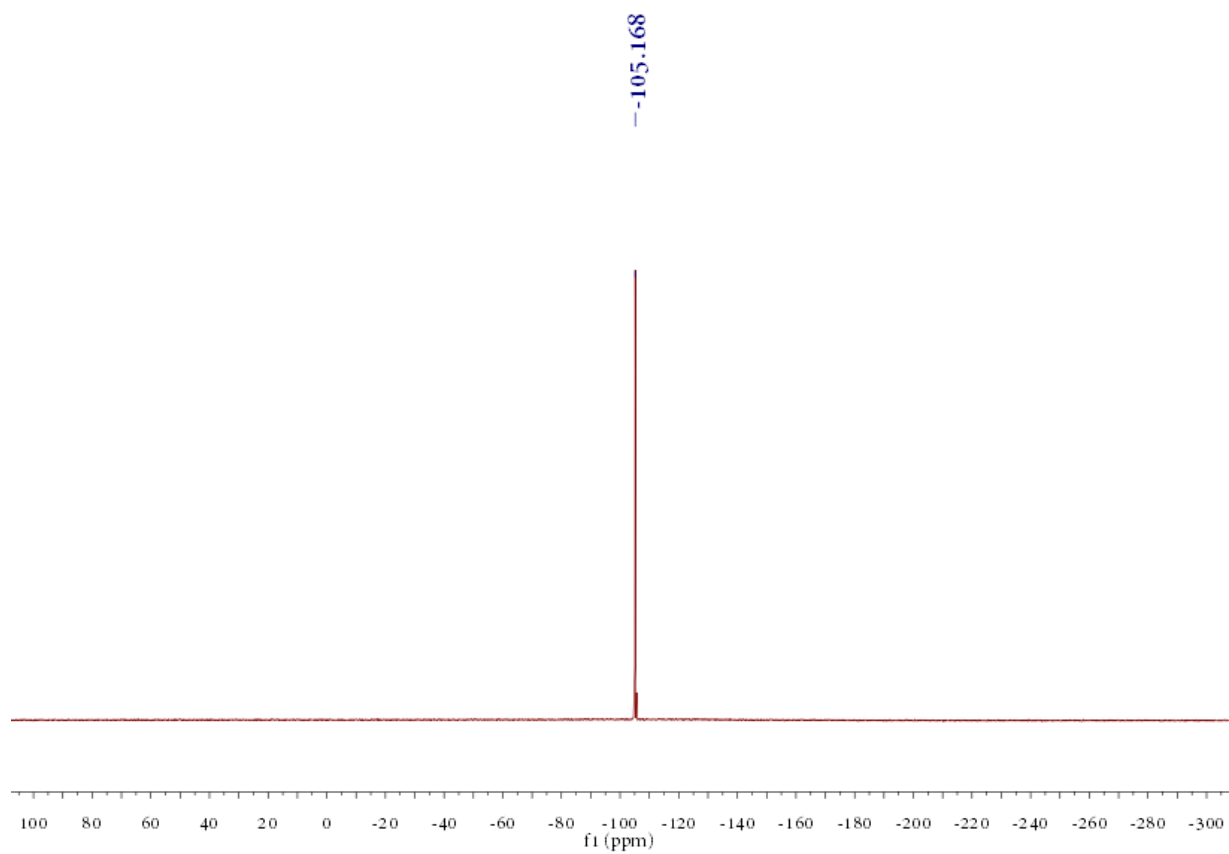

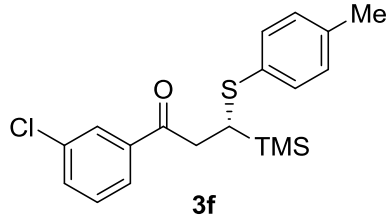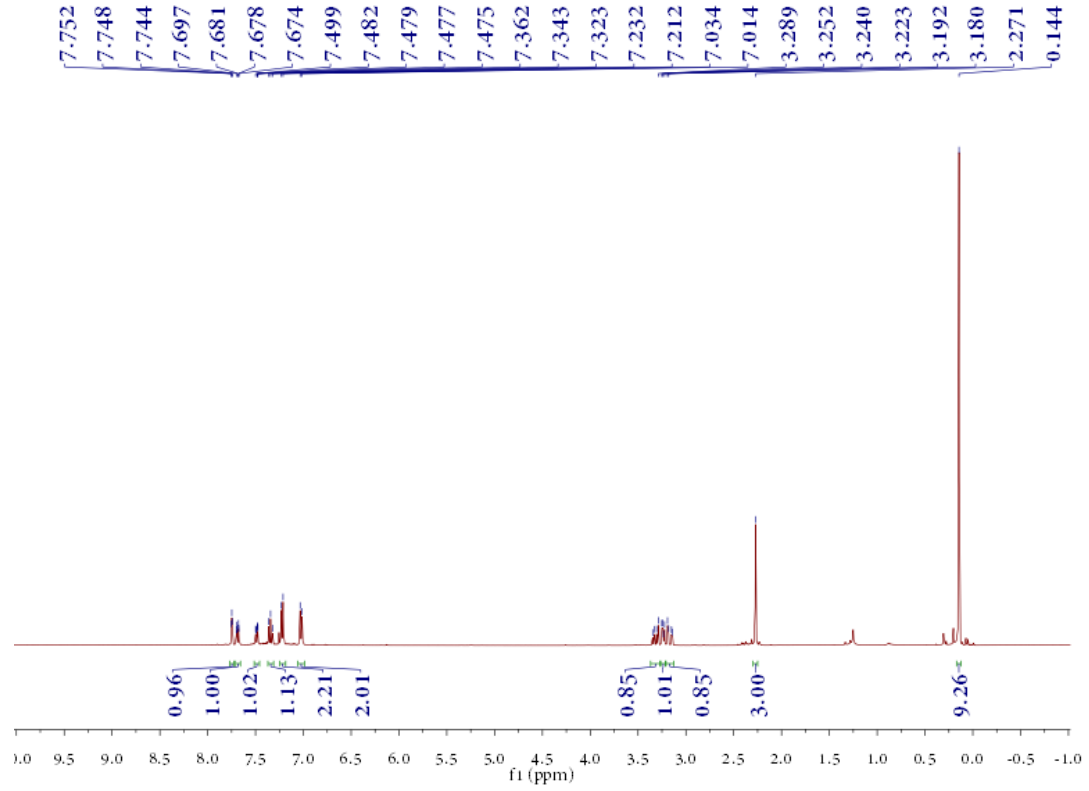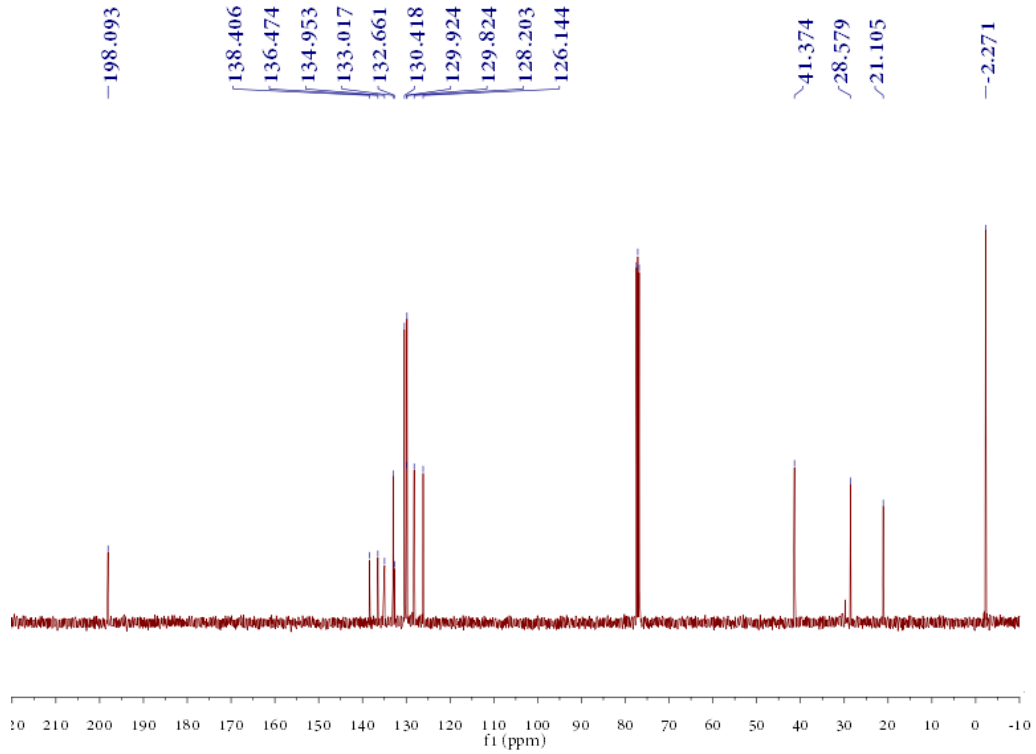

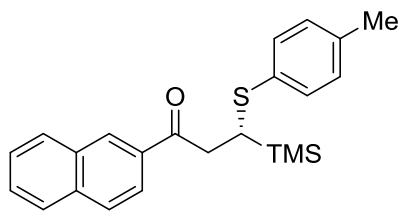

**3g**

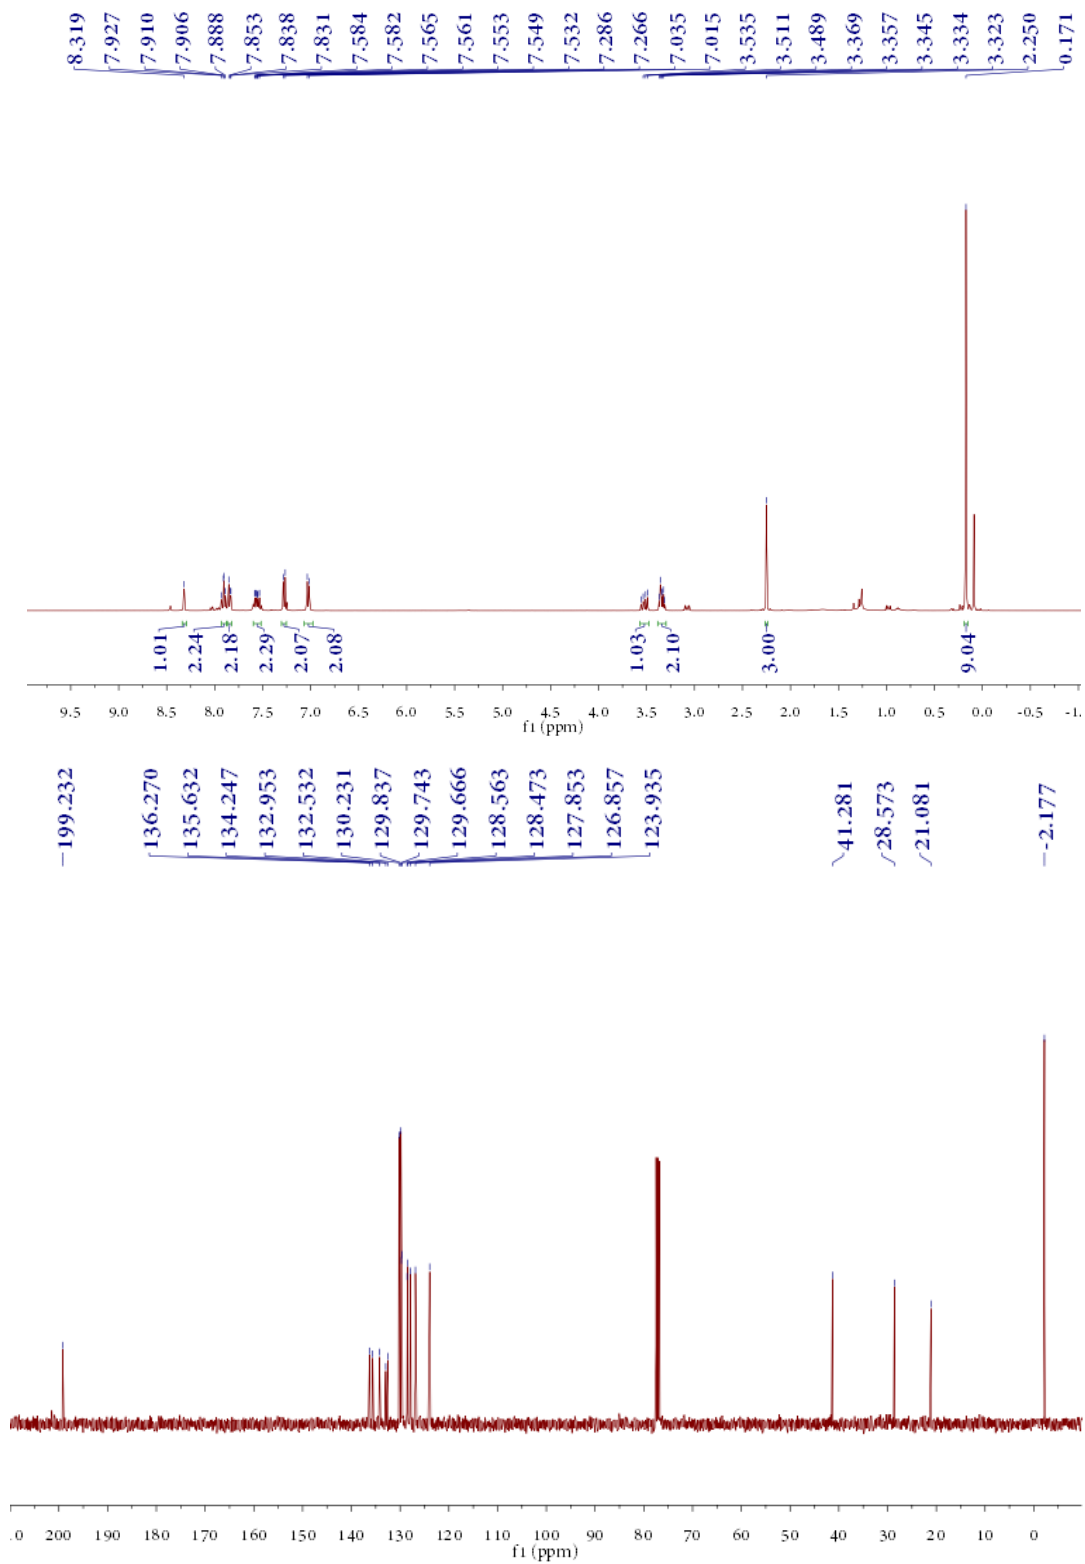

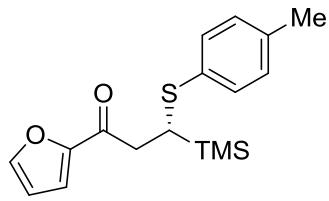

**3h**

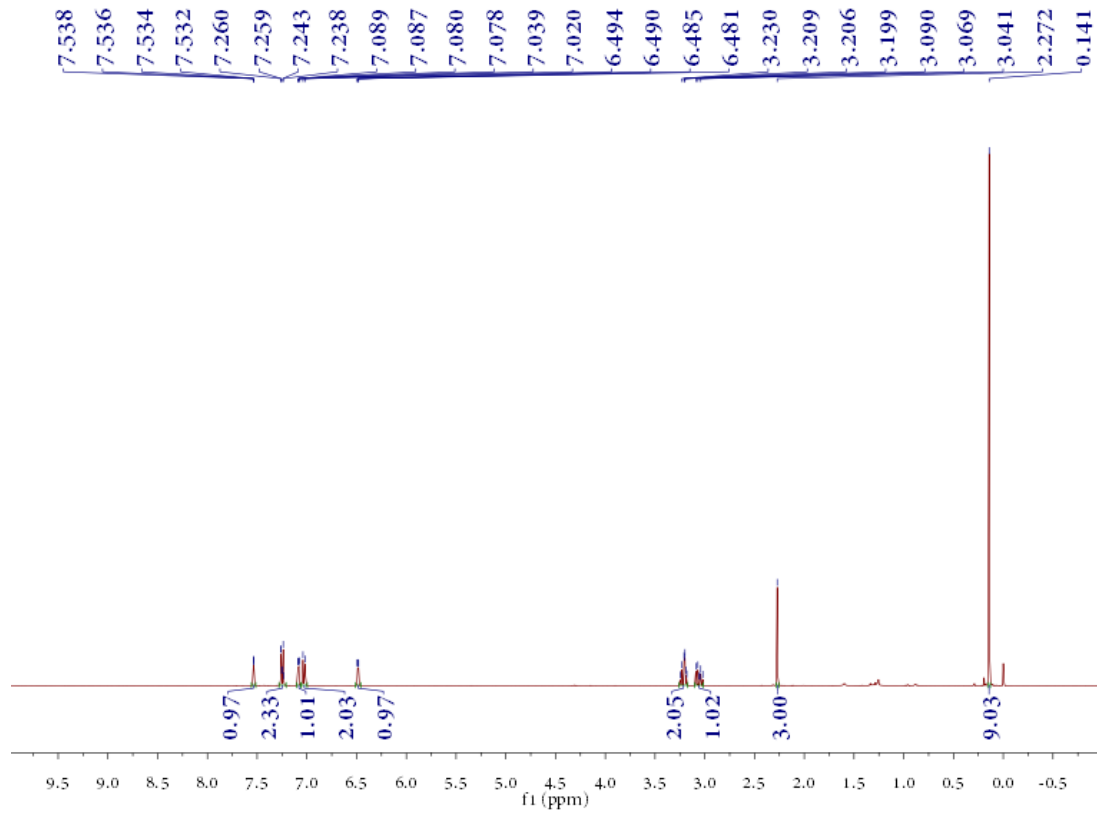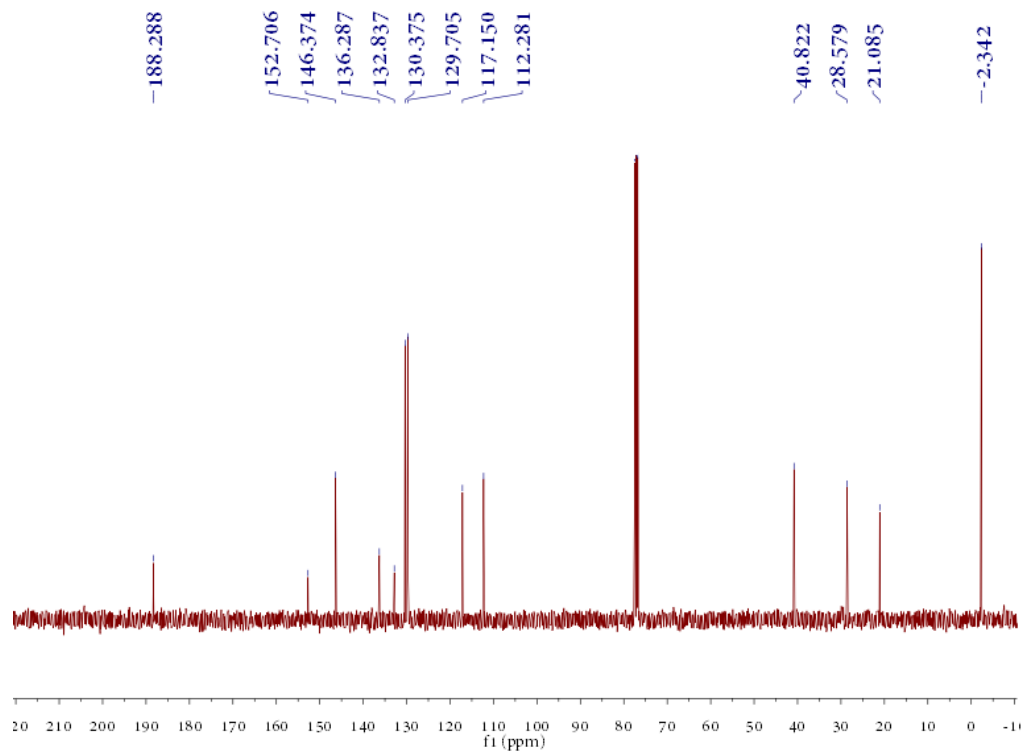

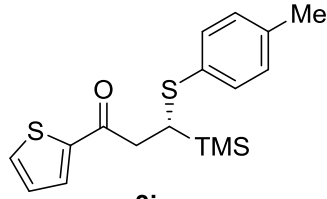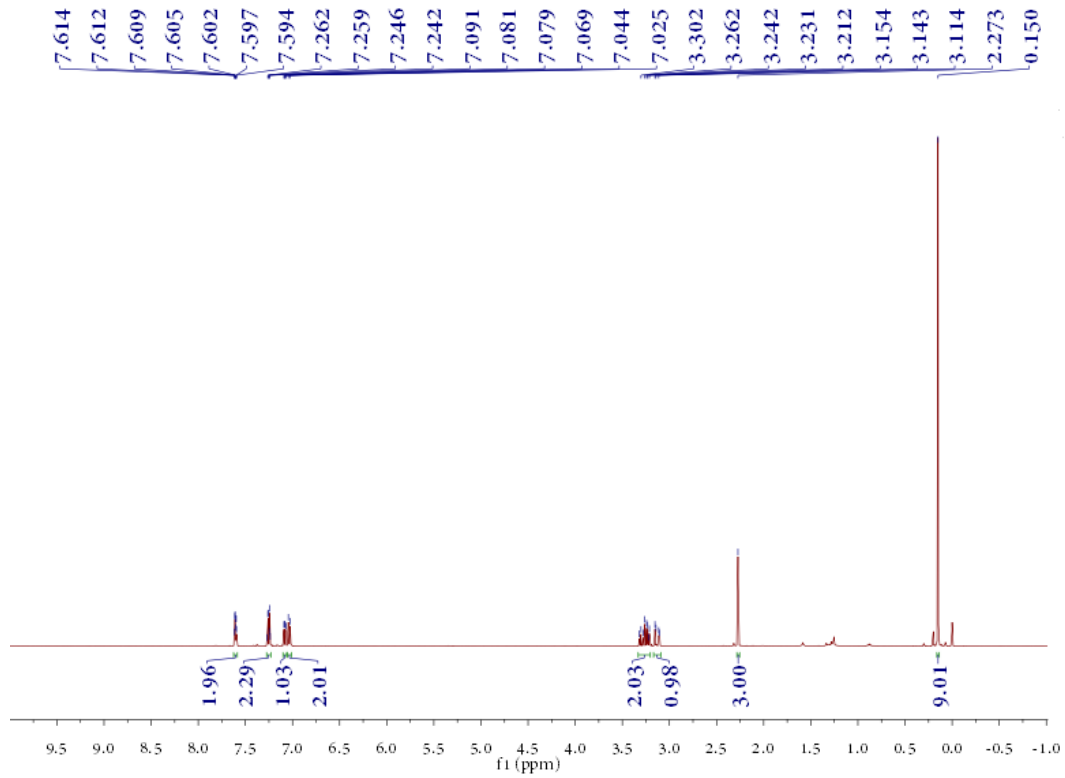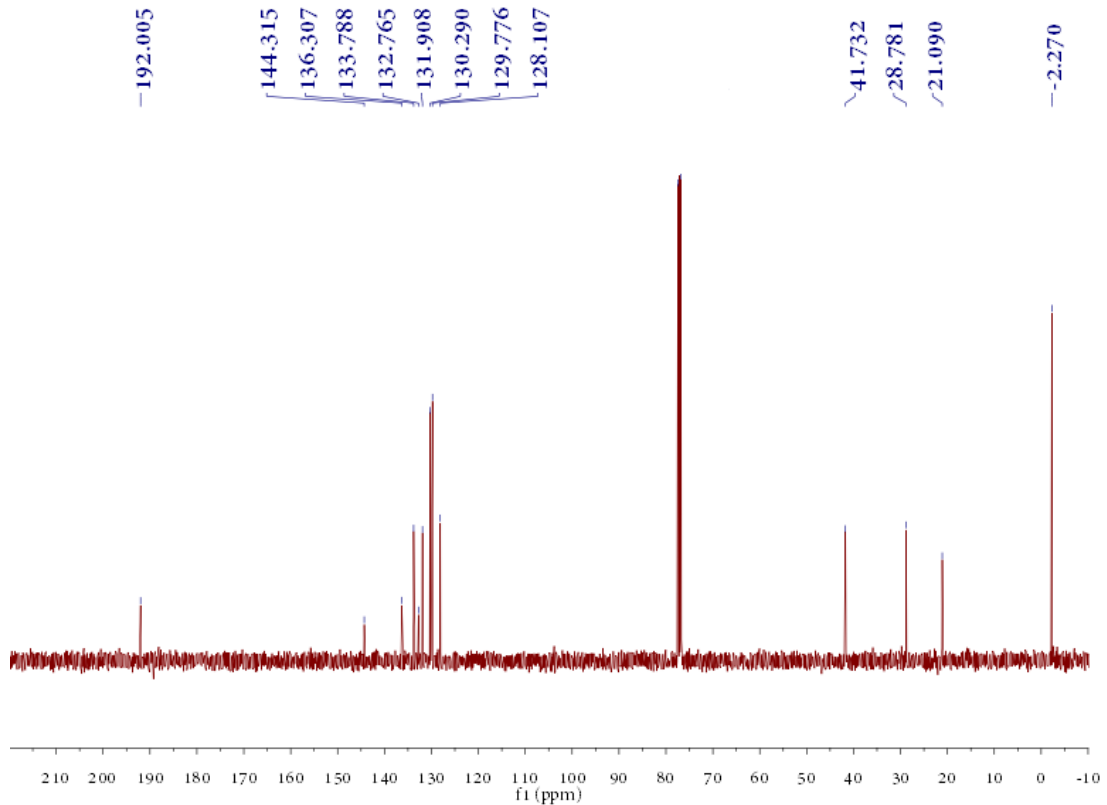

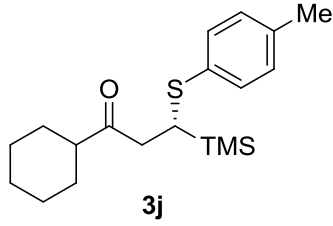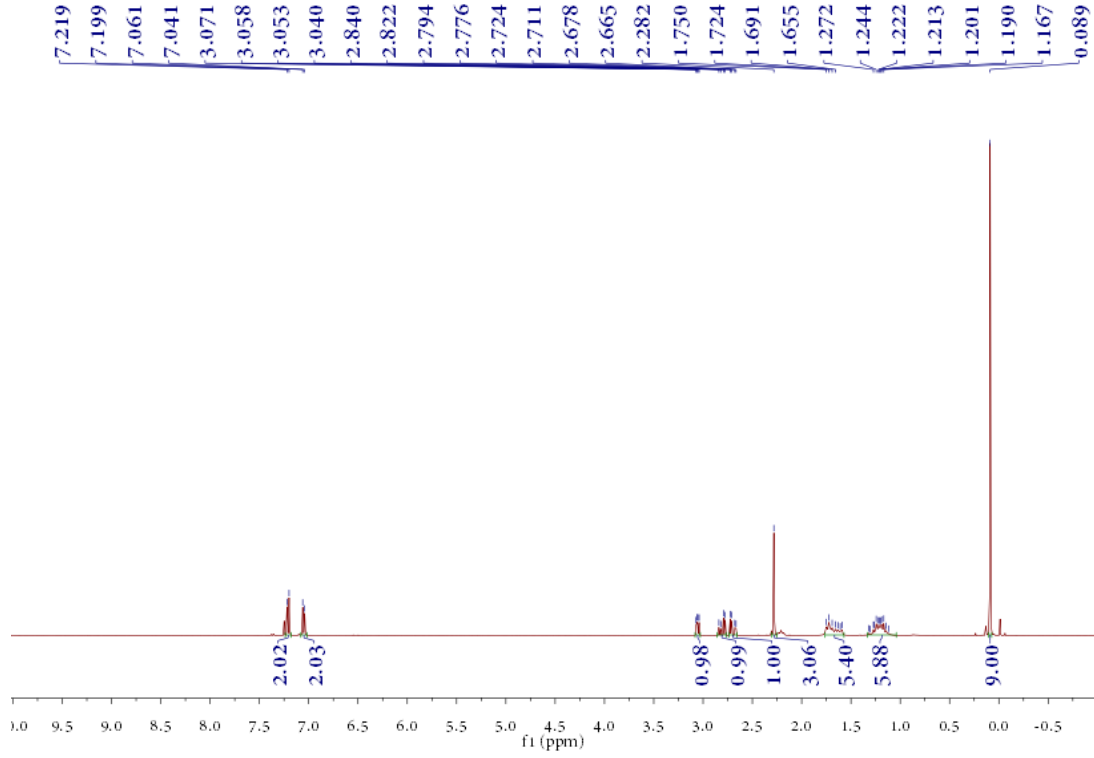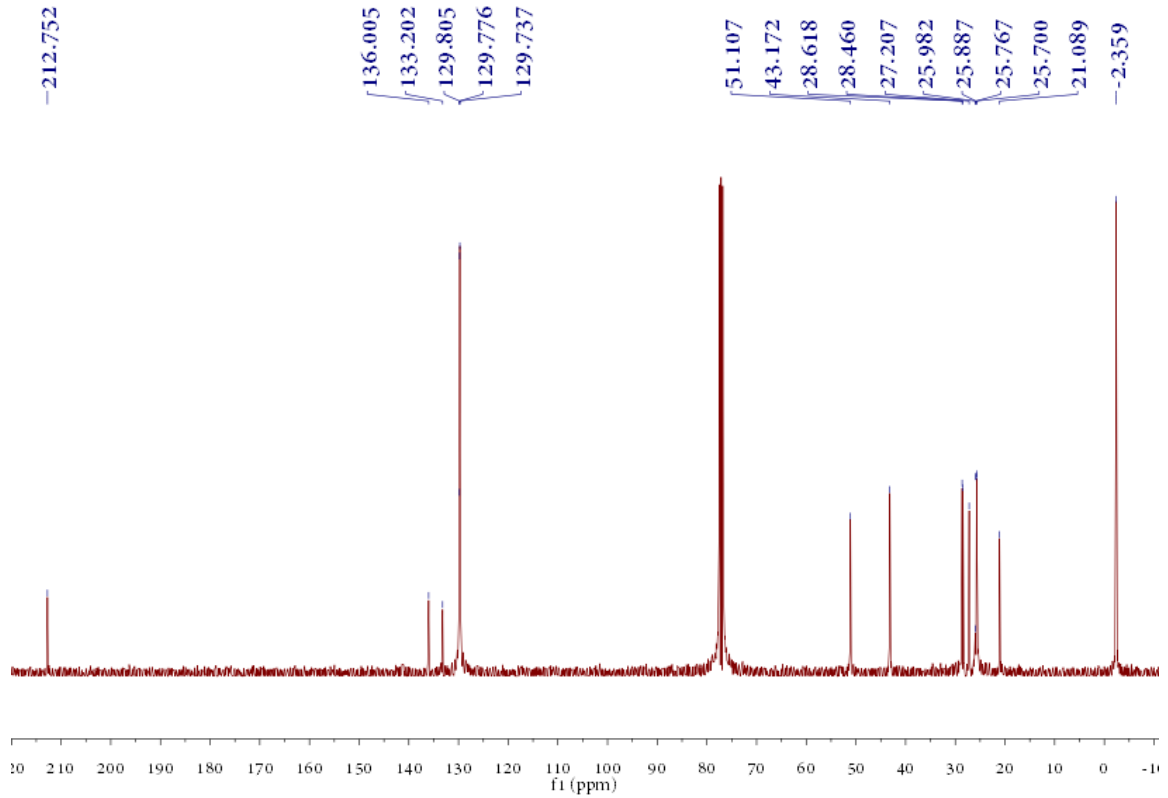



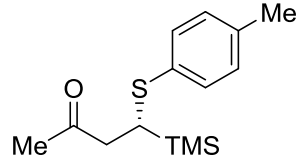

3k

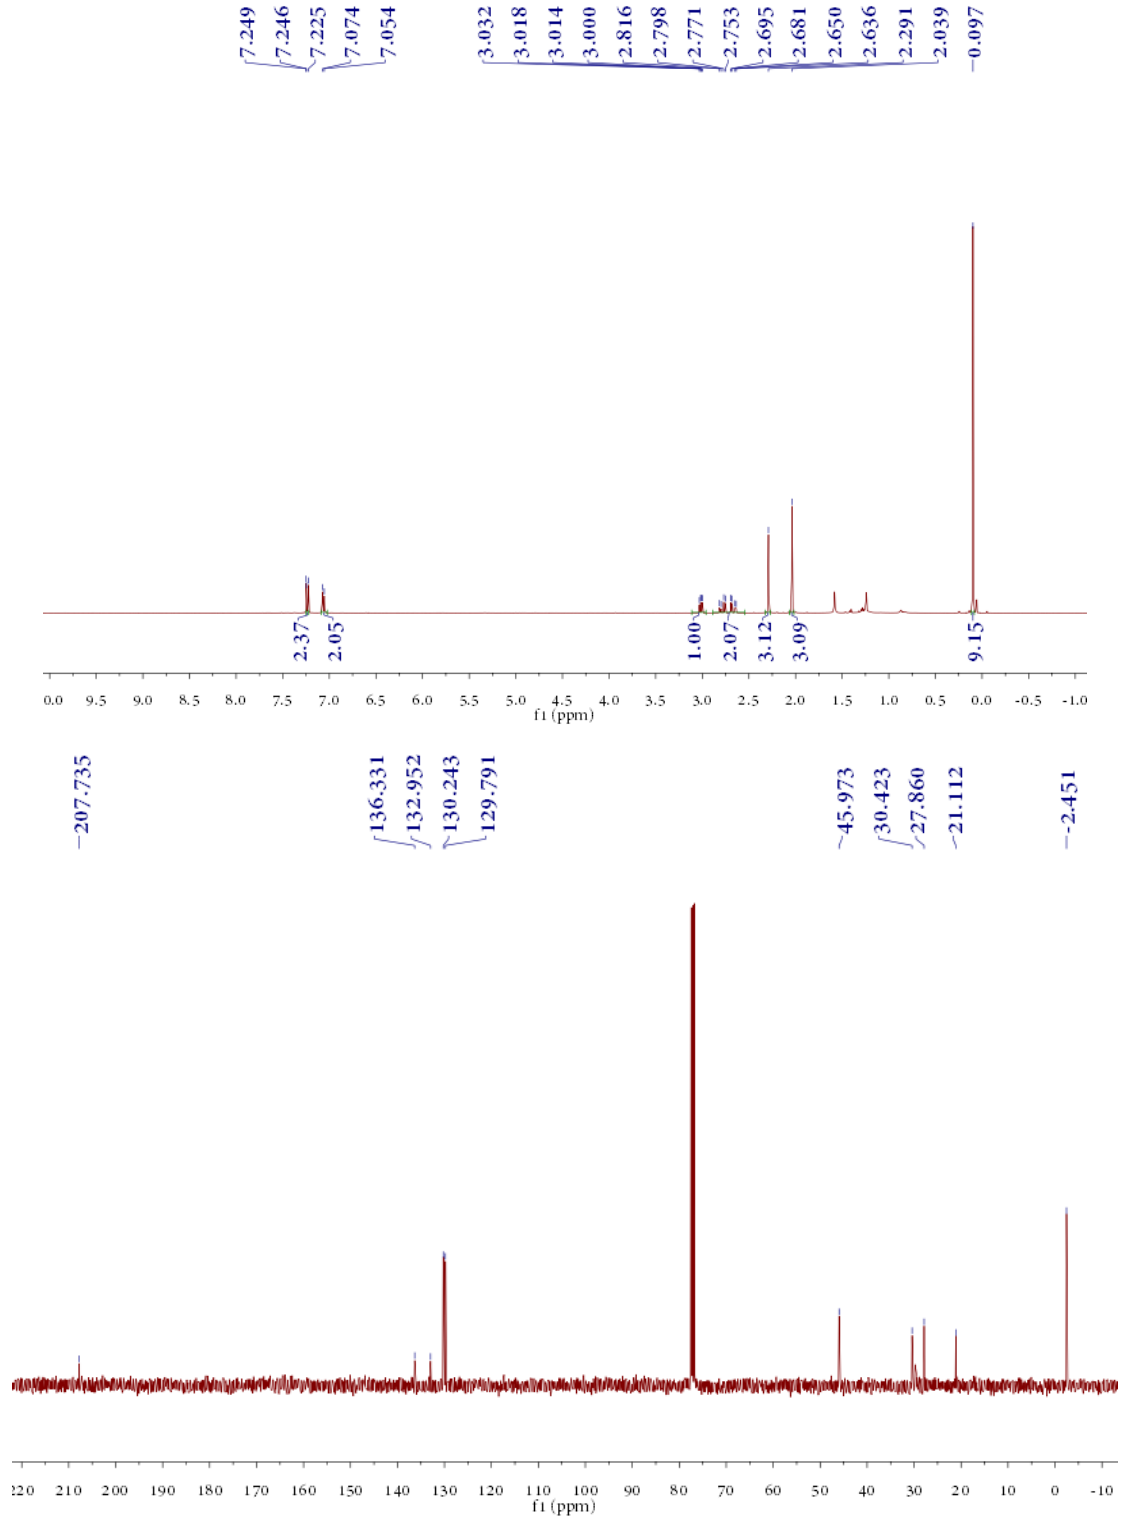

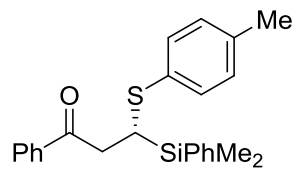

3I

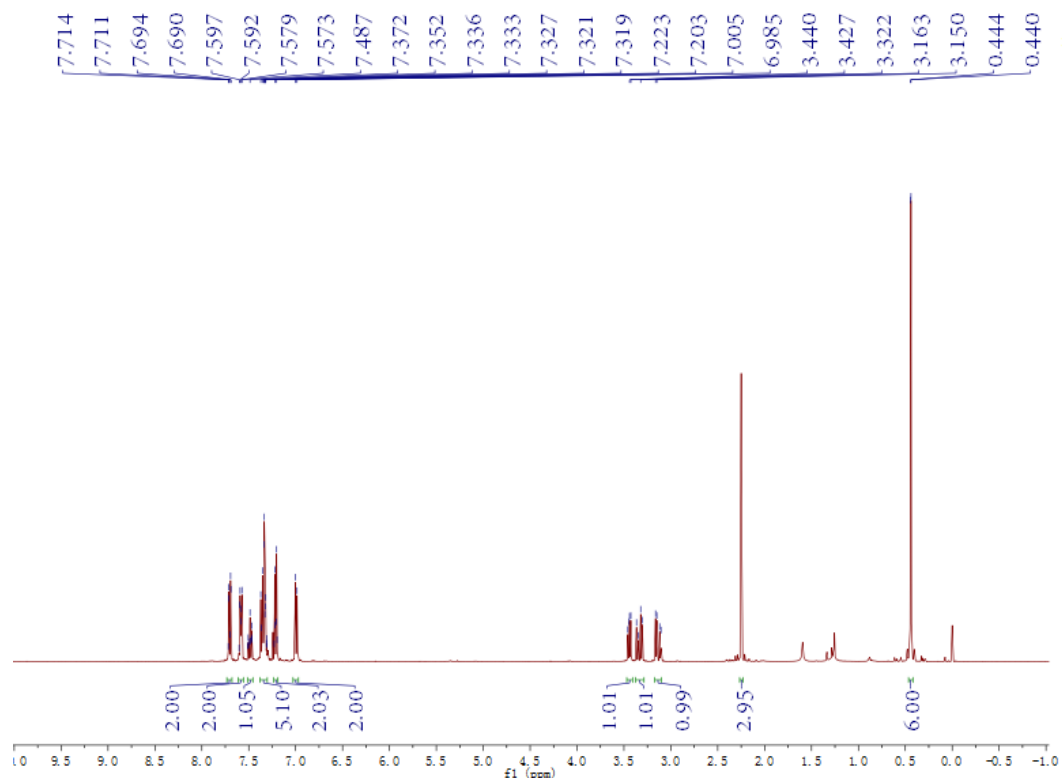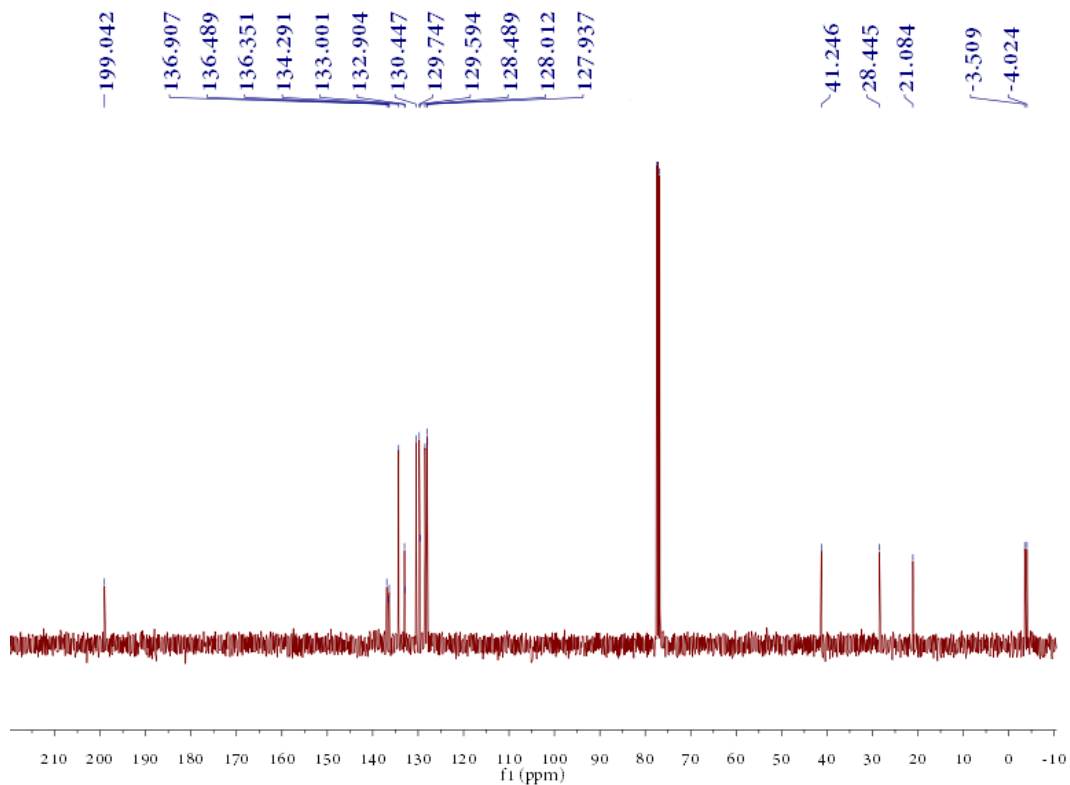

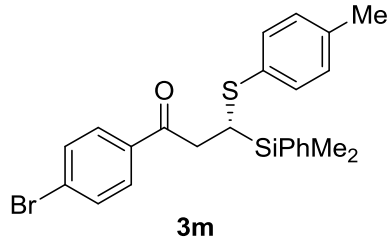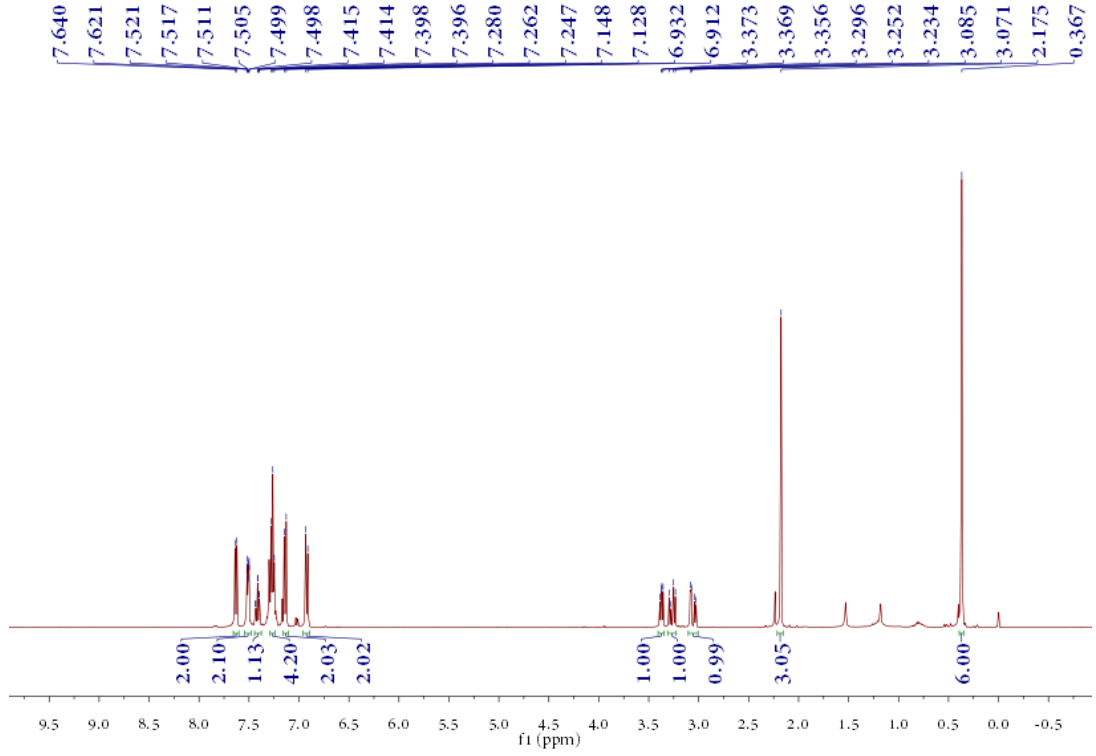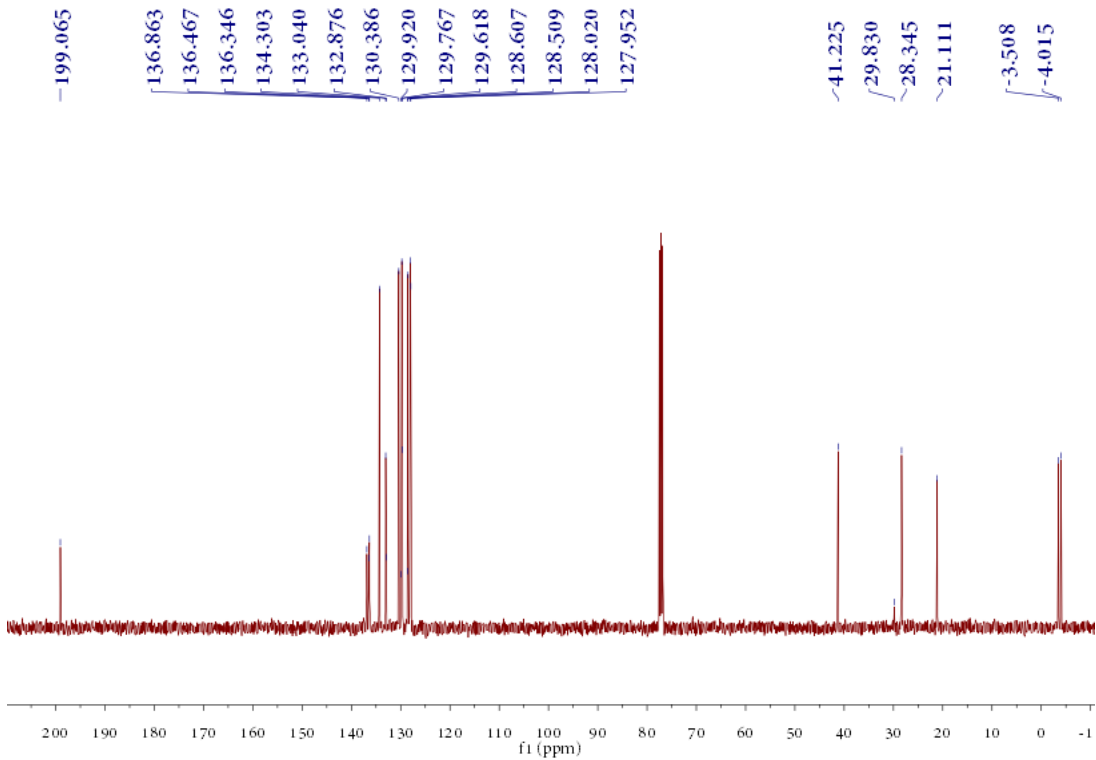

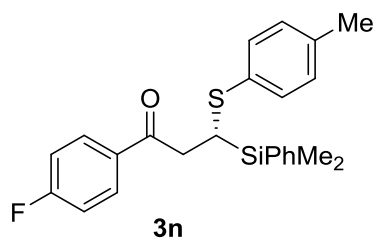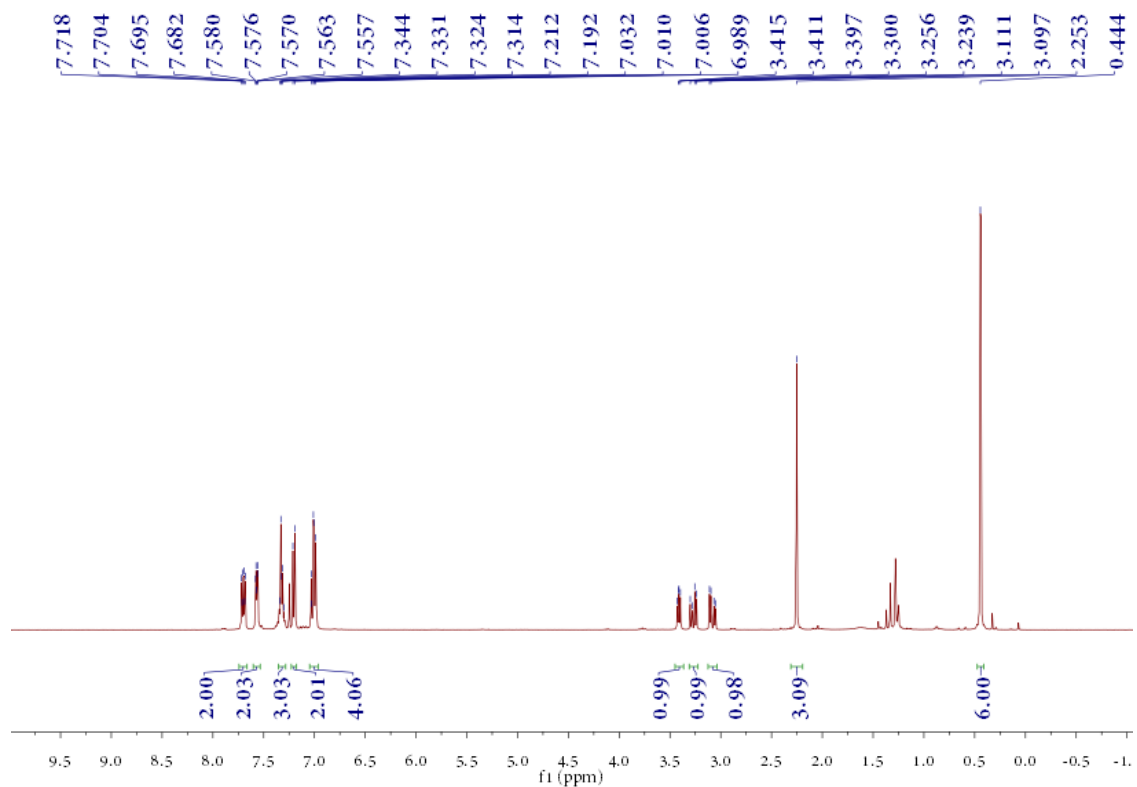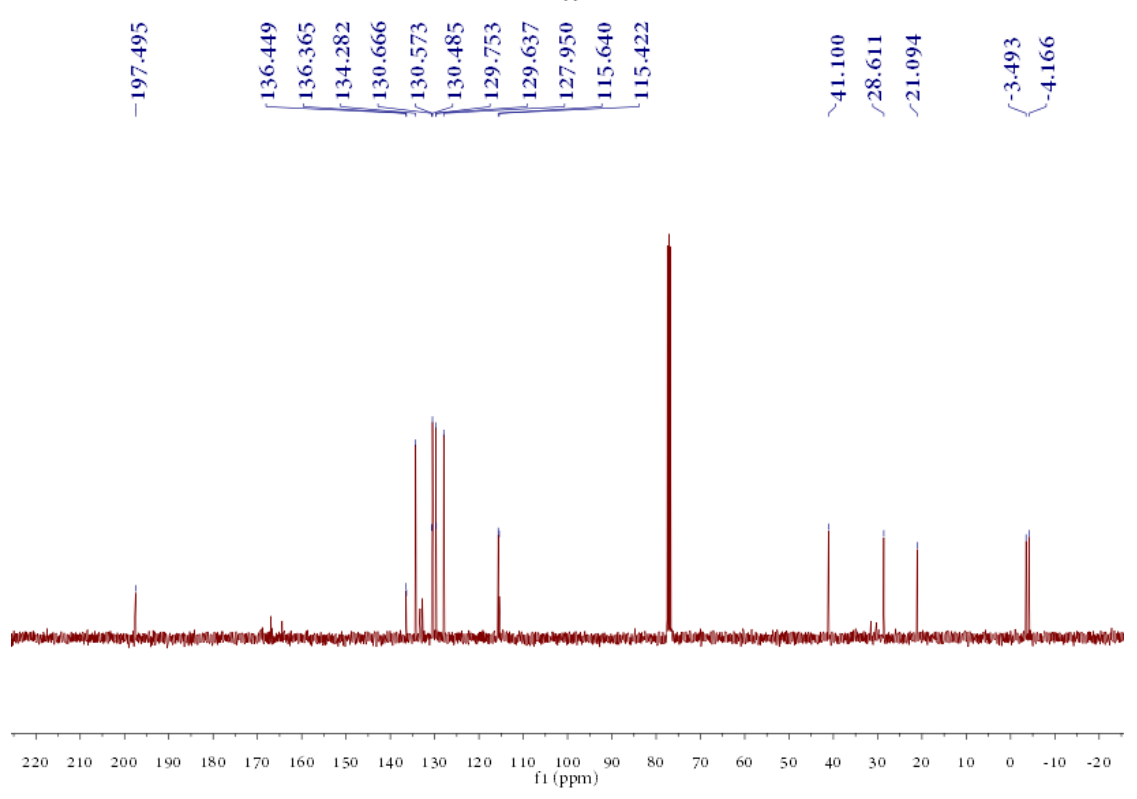

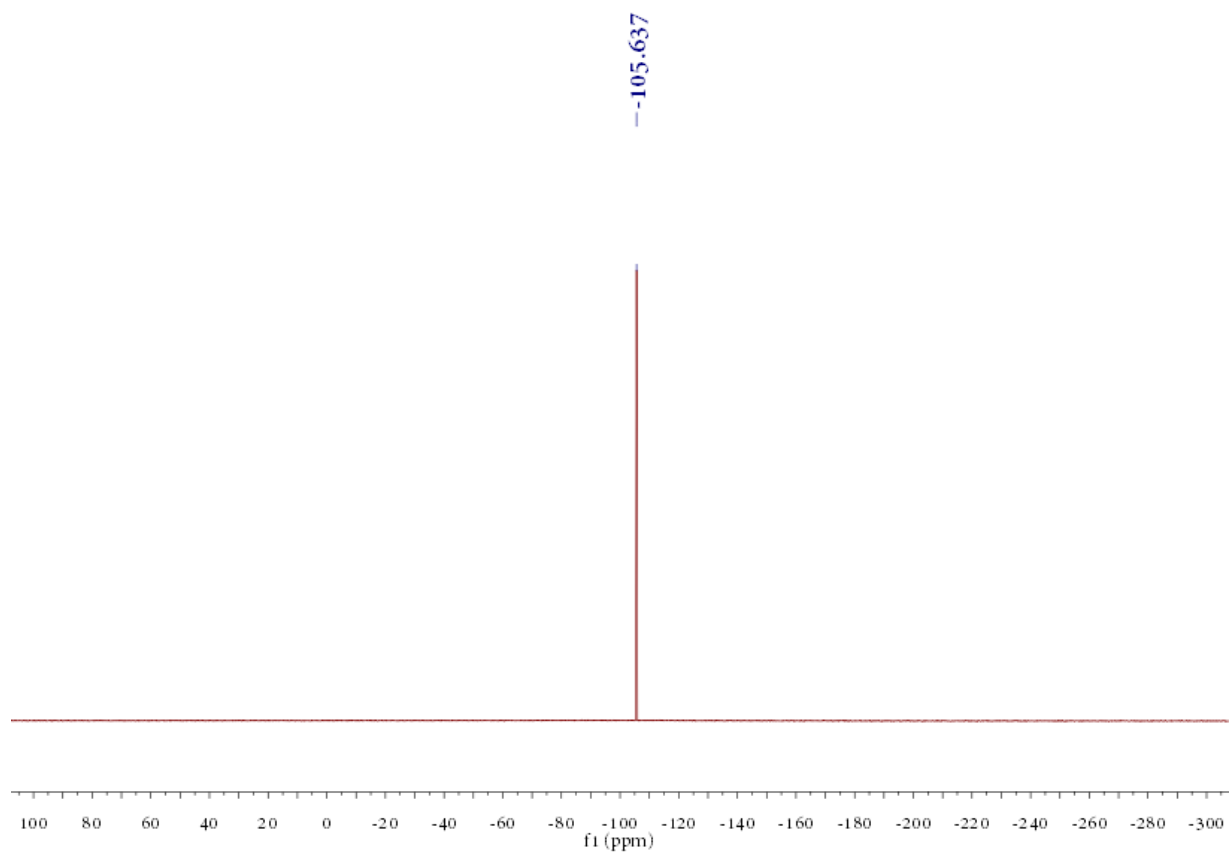

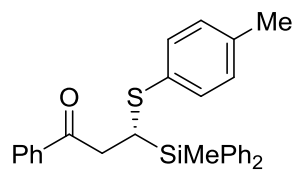

**3o**

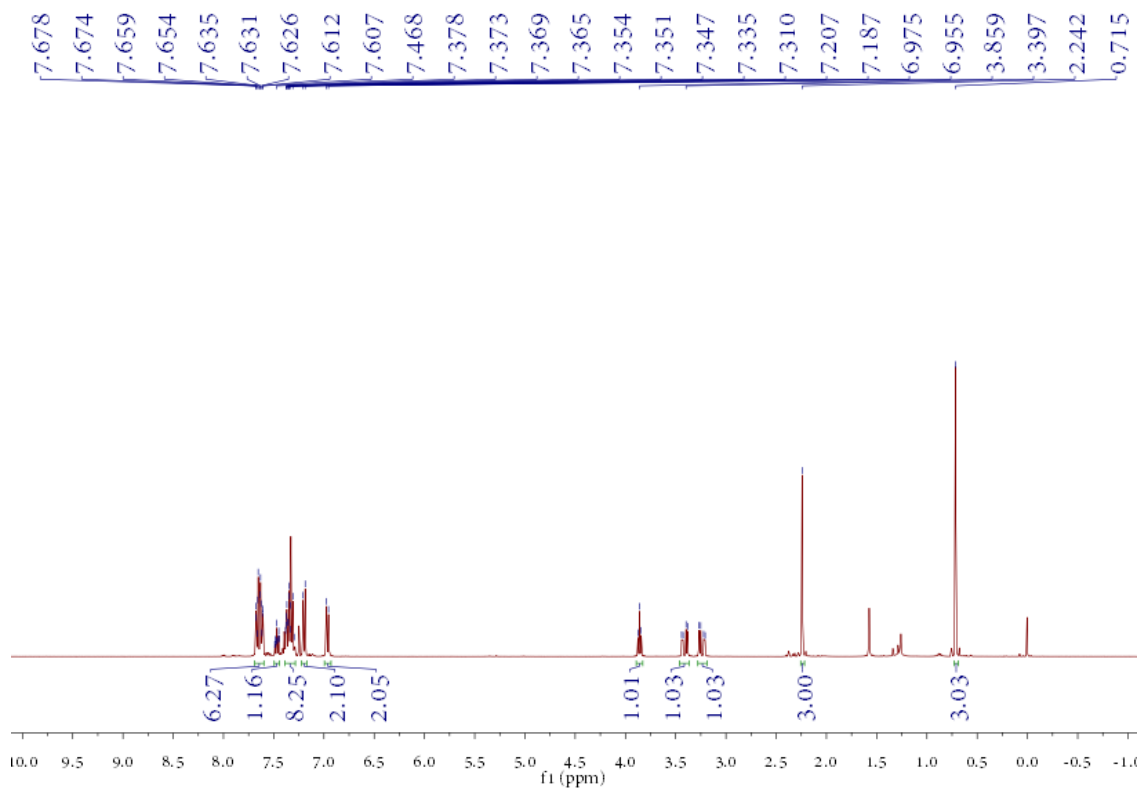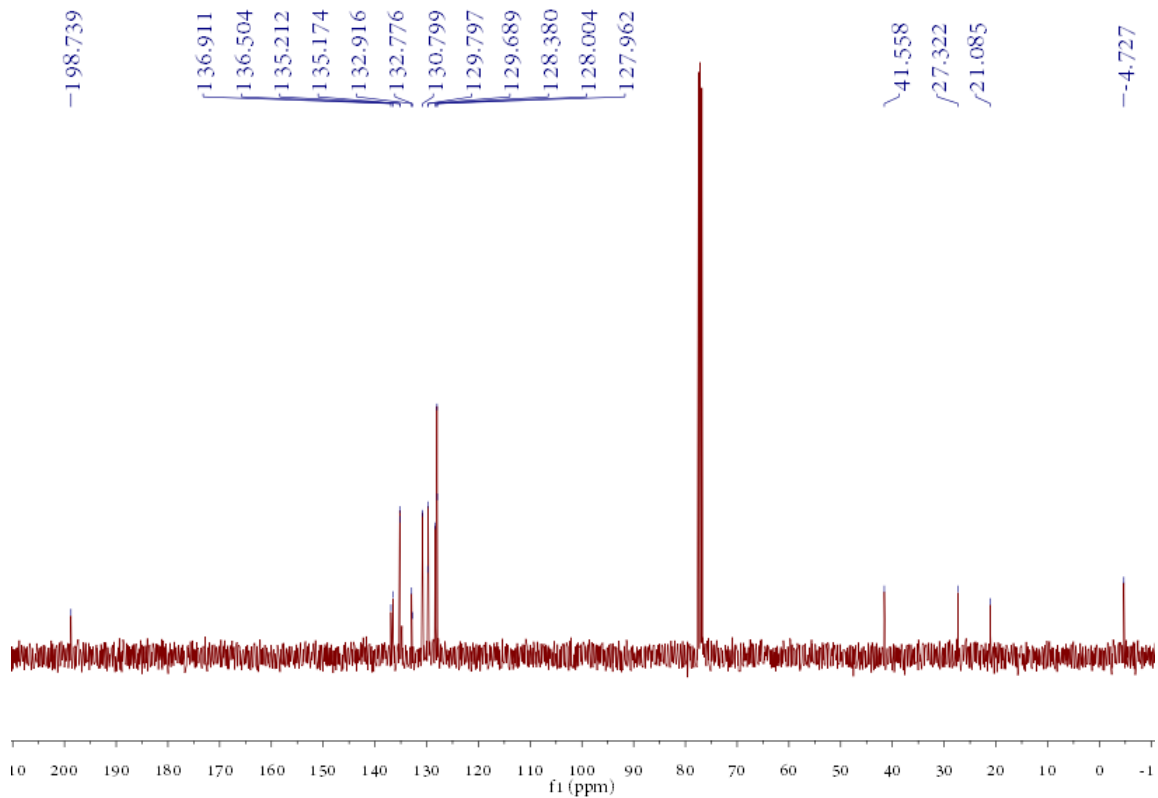

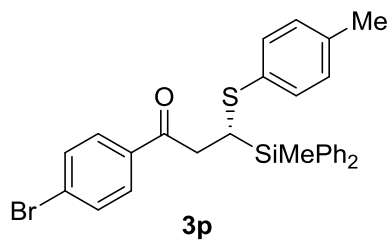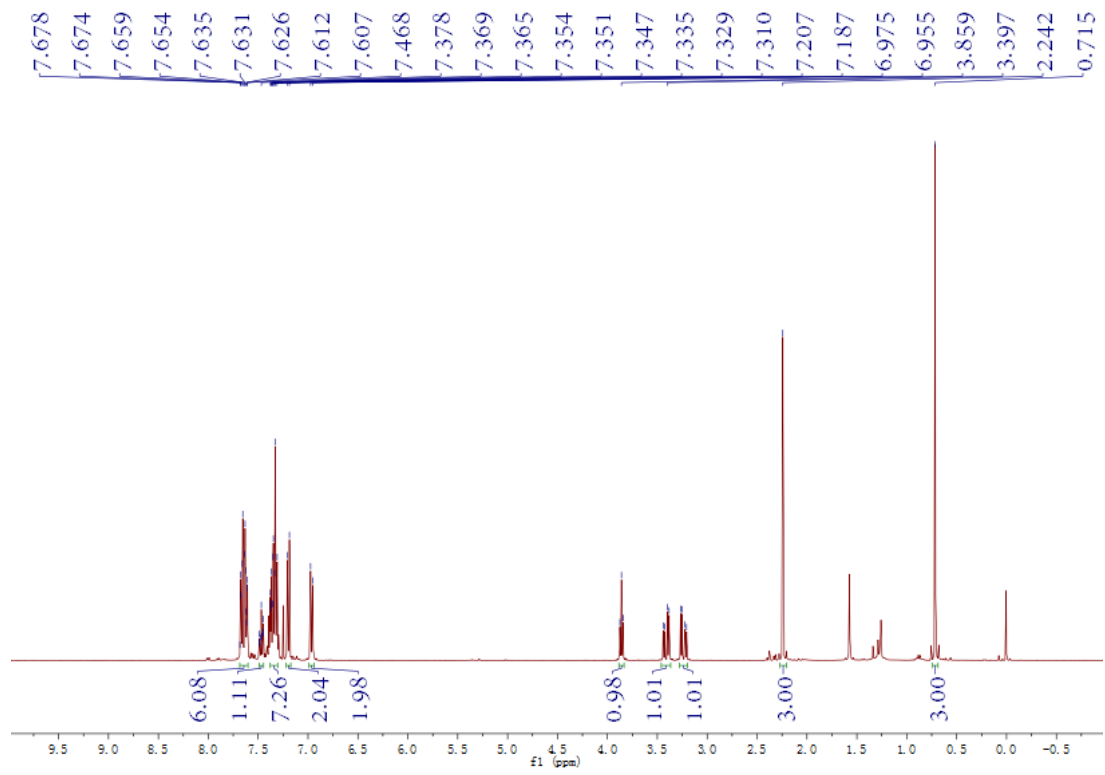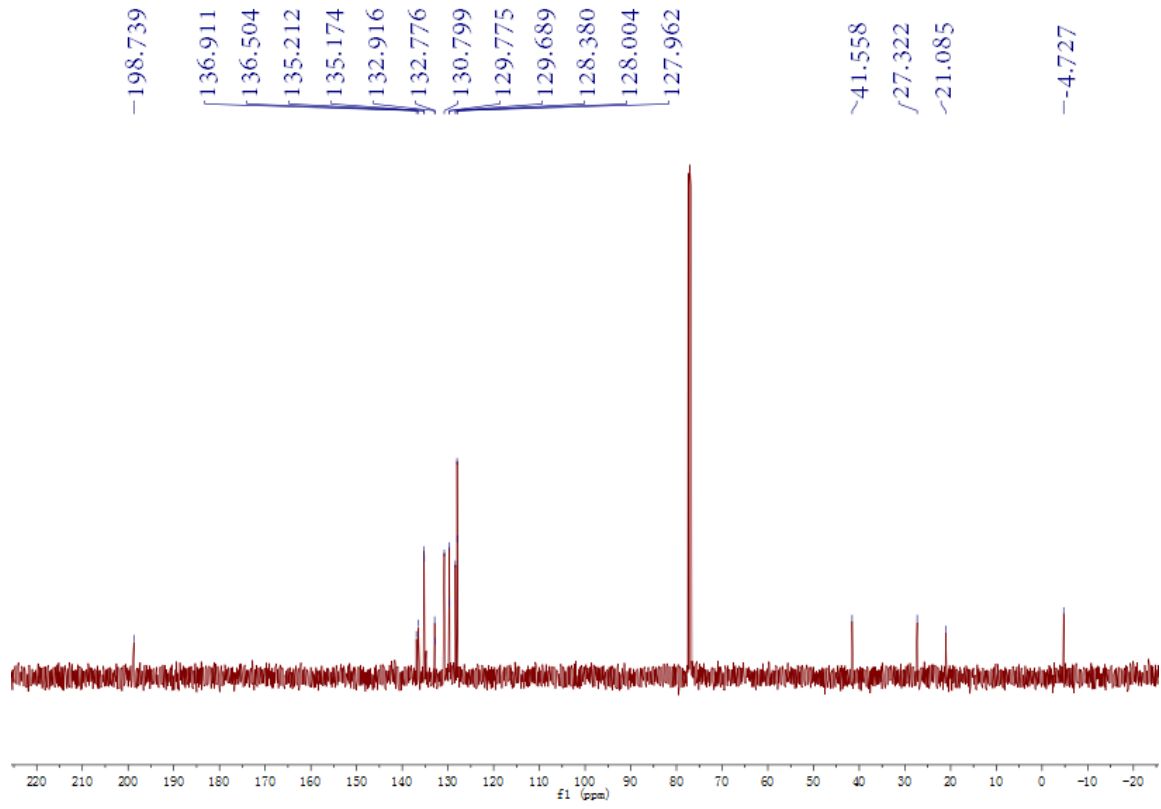

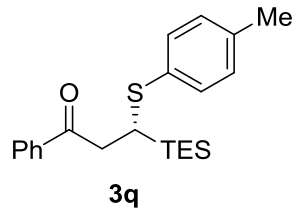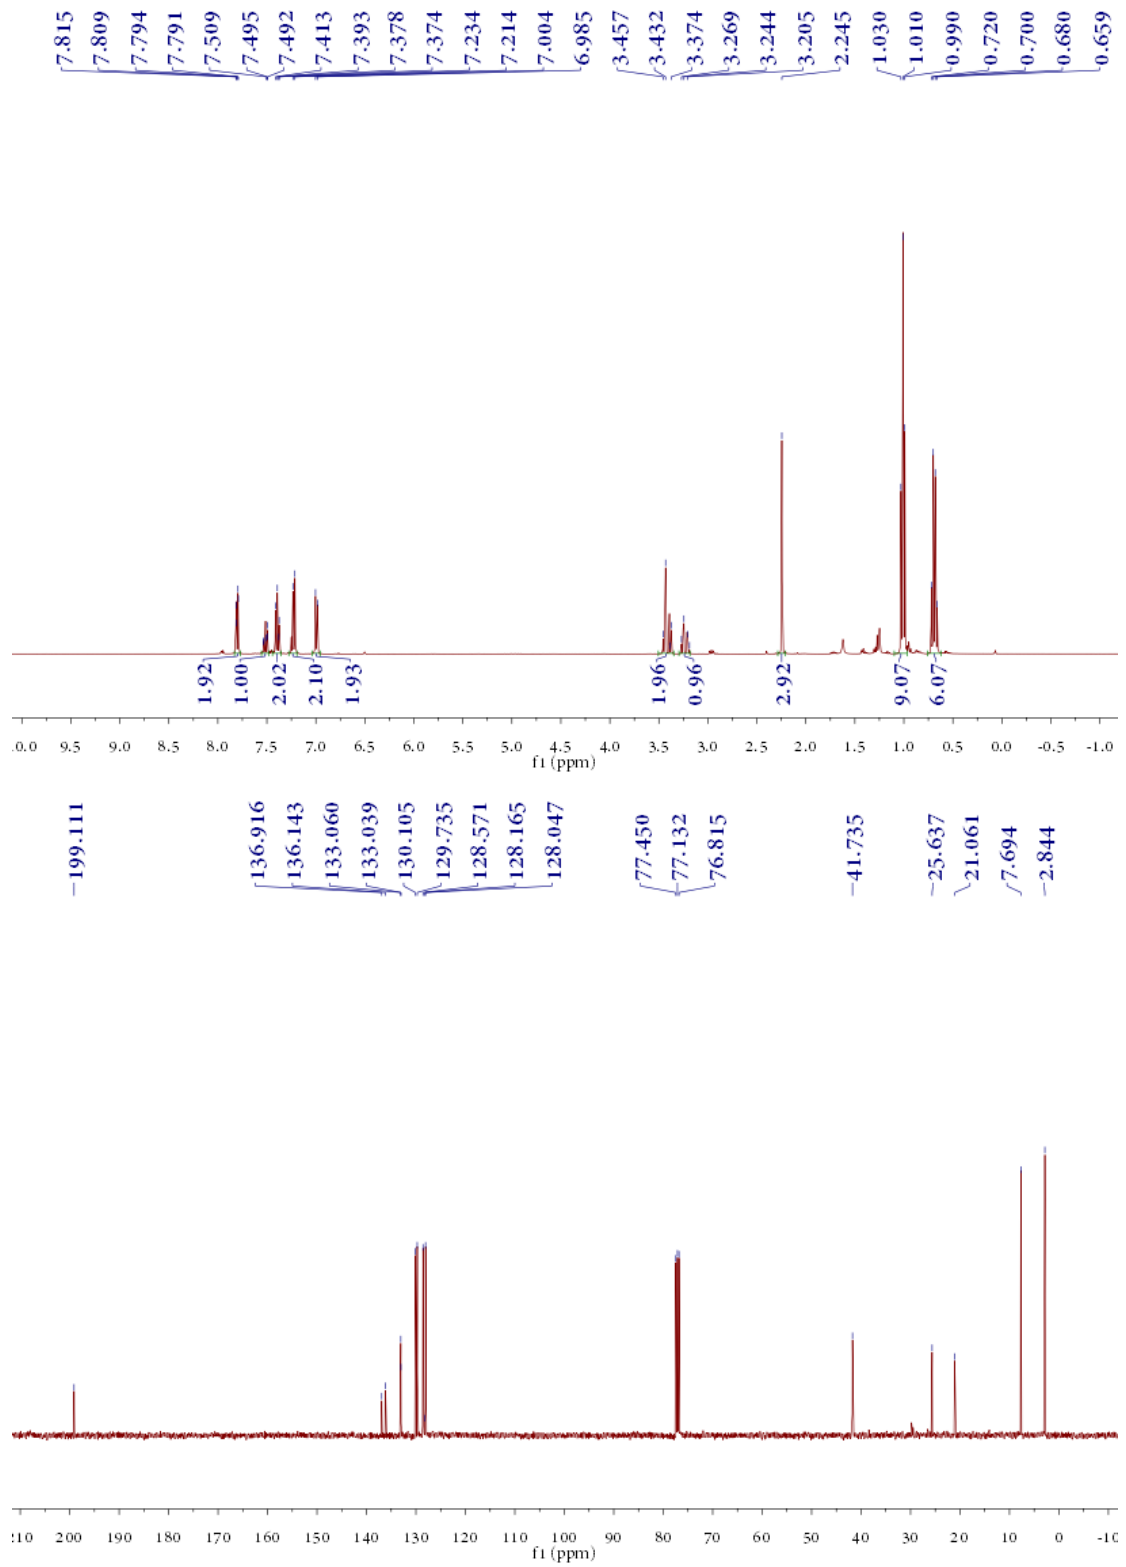



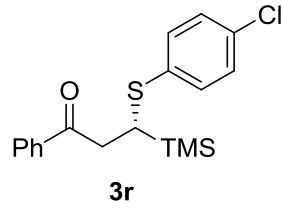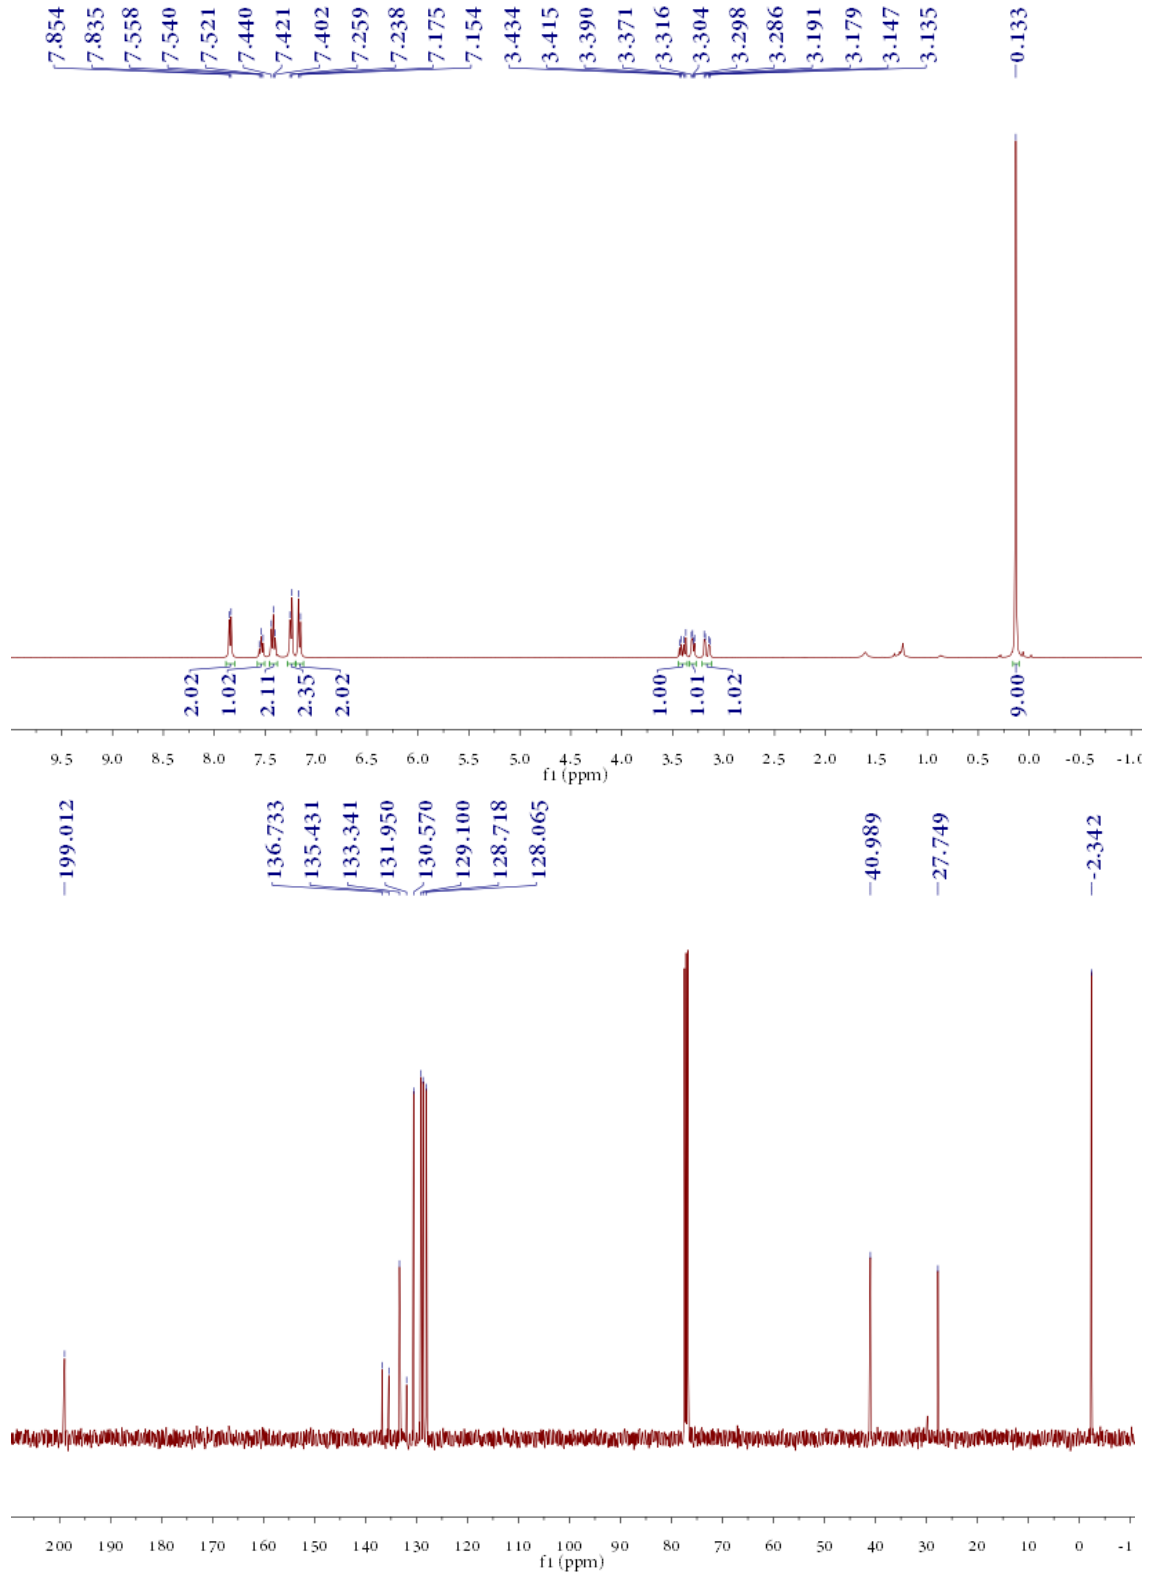

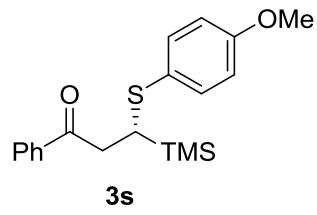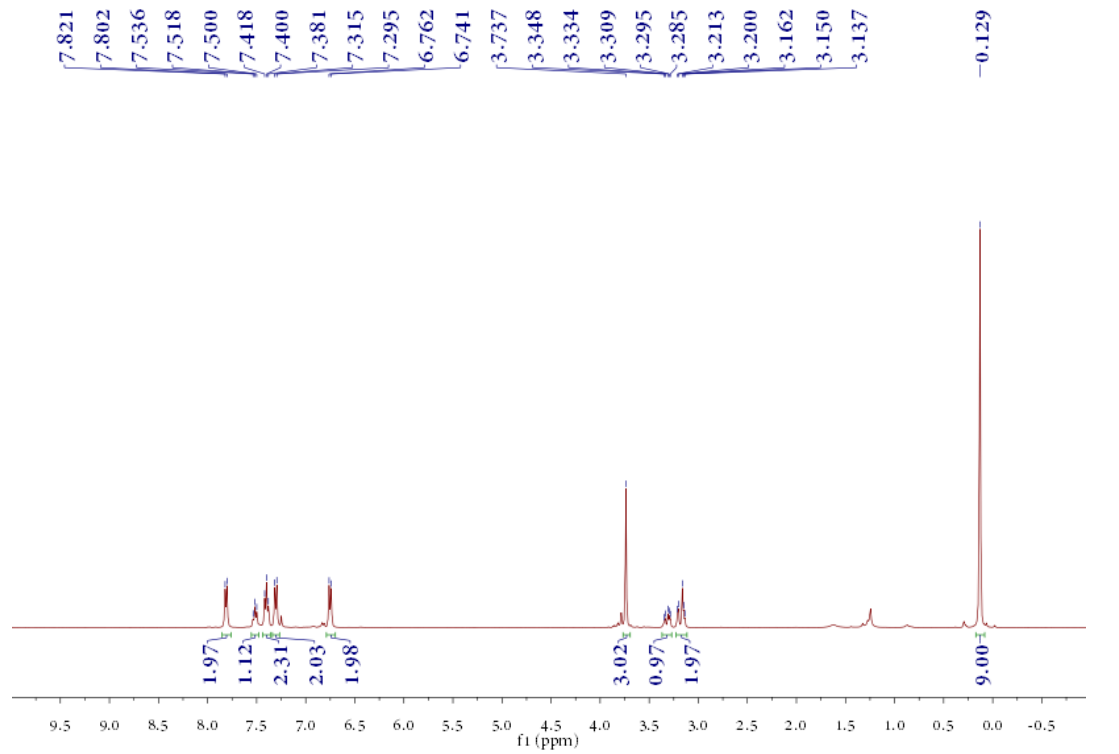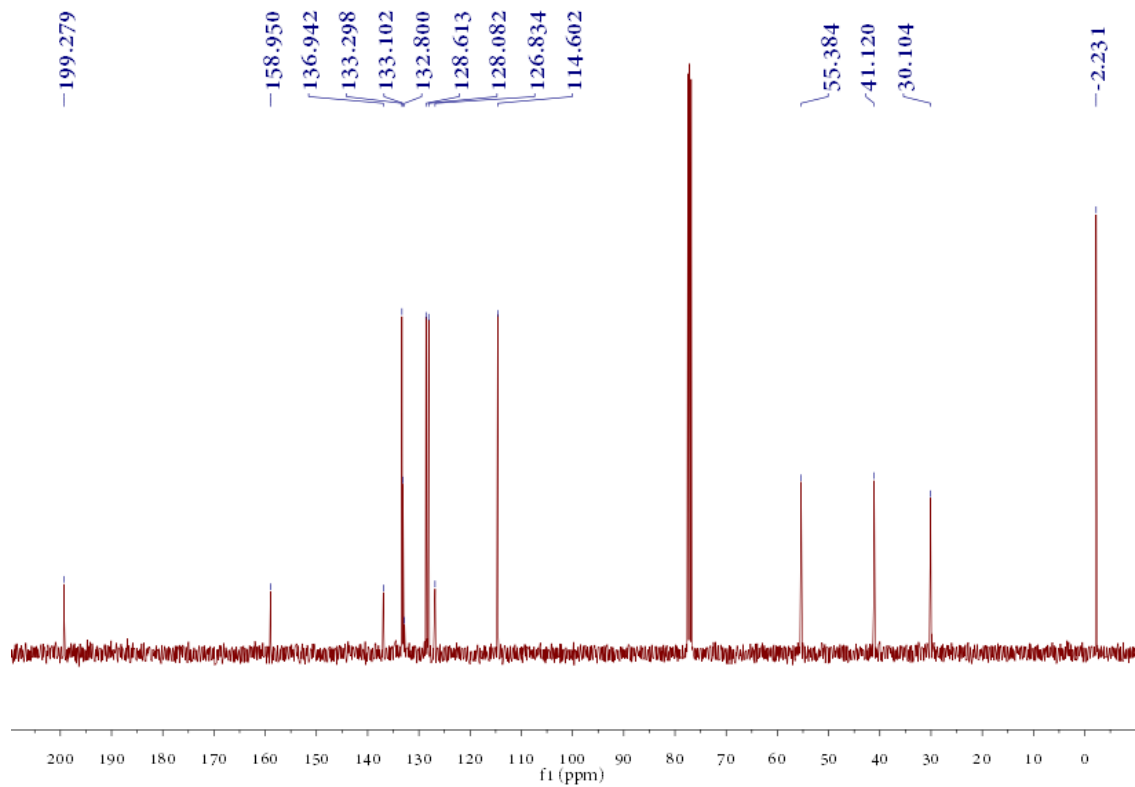

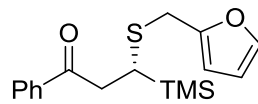

**3t**

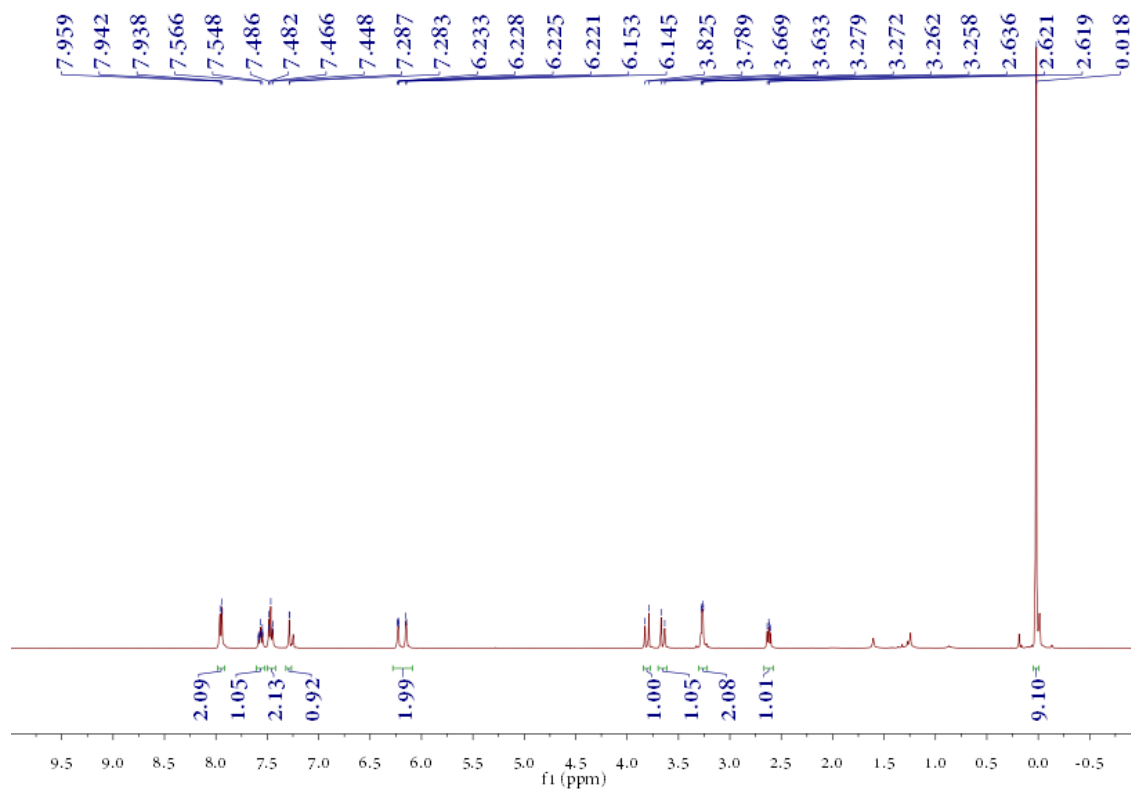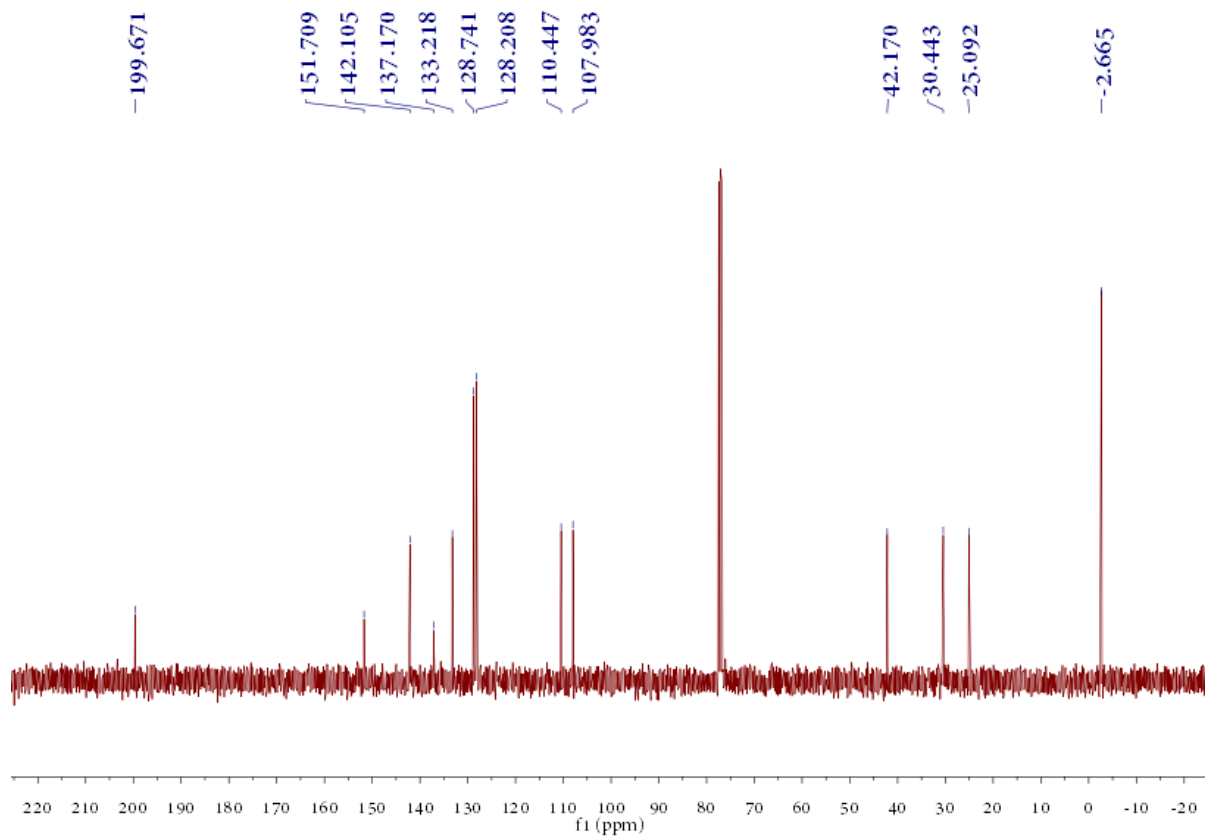

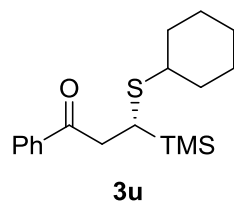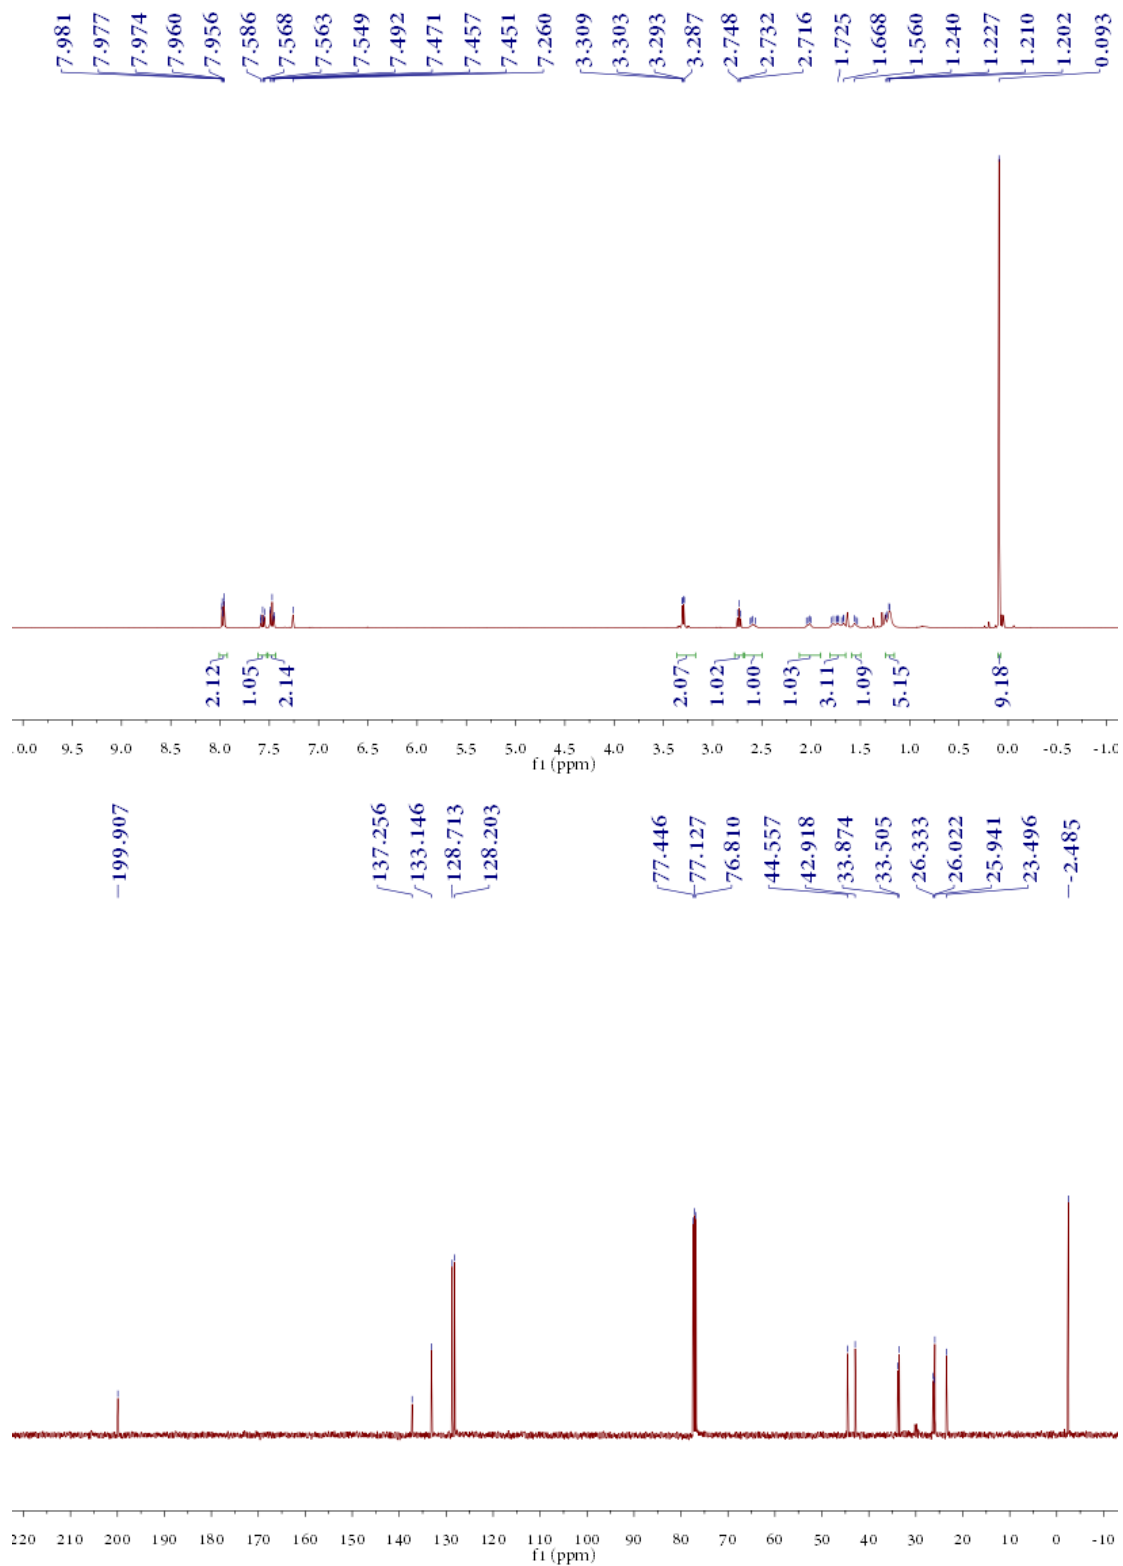

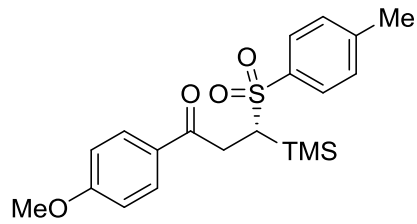

4

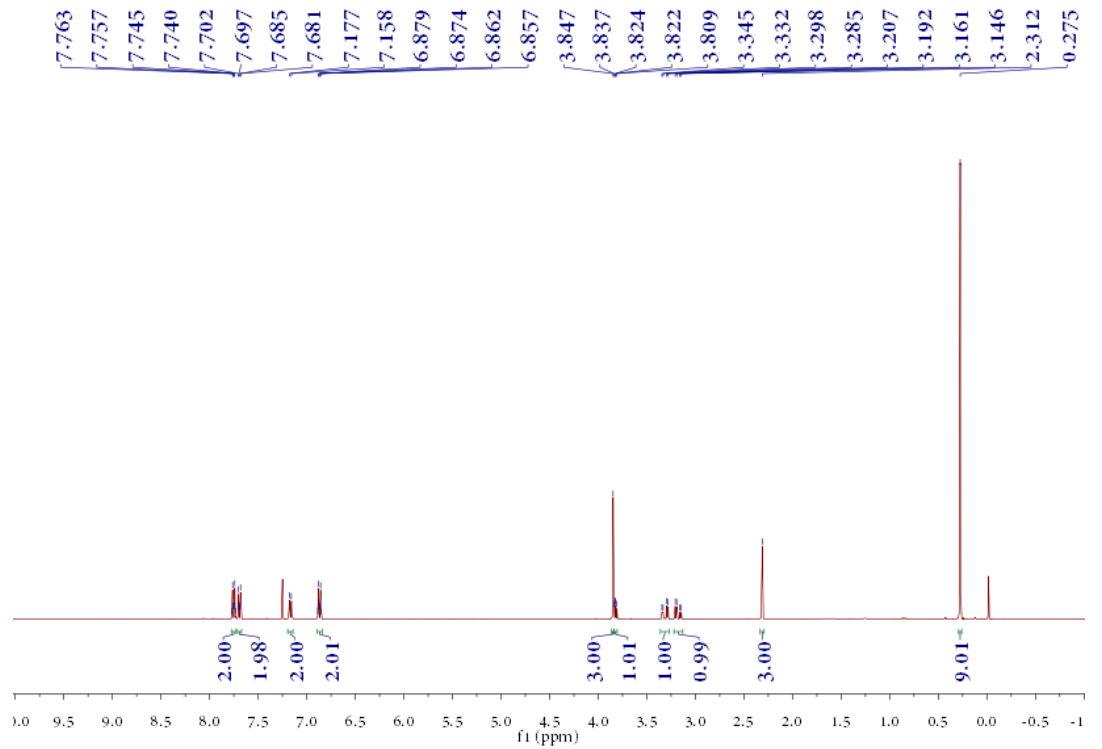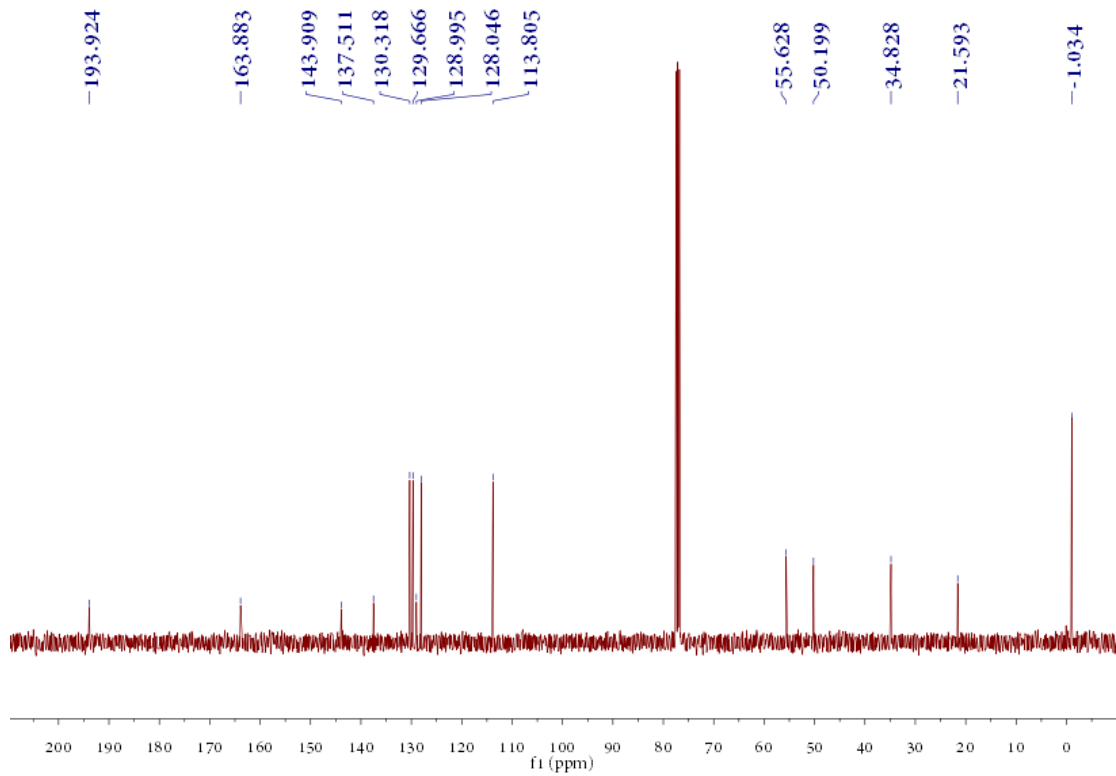

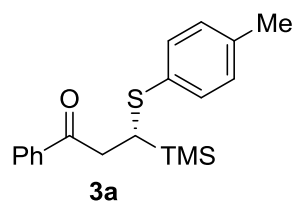

**<Chromatogram>**

mAU

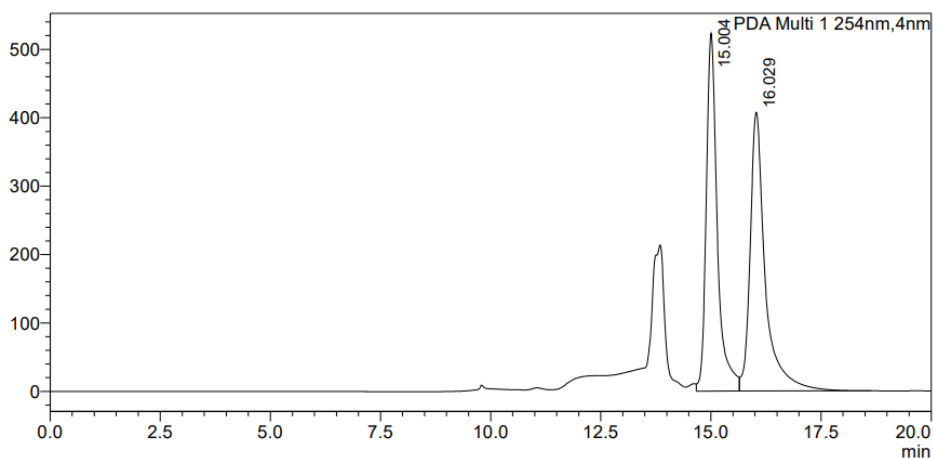

**<Peak Table>**

PDA Ch1 254nm

| Peak# | Ret. Time | Area     | Area%   | Height |
|-------|-----------|----------|---------|--------|
| 1     | 15.004    | 9145690  | 48.427  | 522962 |
| 2     | 16.029    | 9740015  | 51.573  | 407395 |
| Total |           | 18885705 | 100.000 | 930358 |

**<Chromatogram>**

mAU

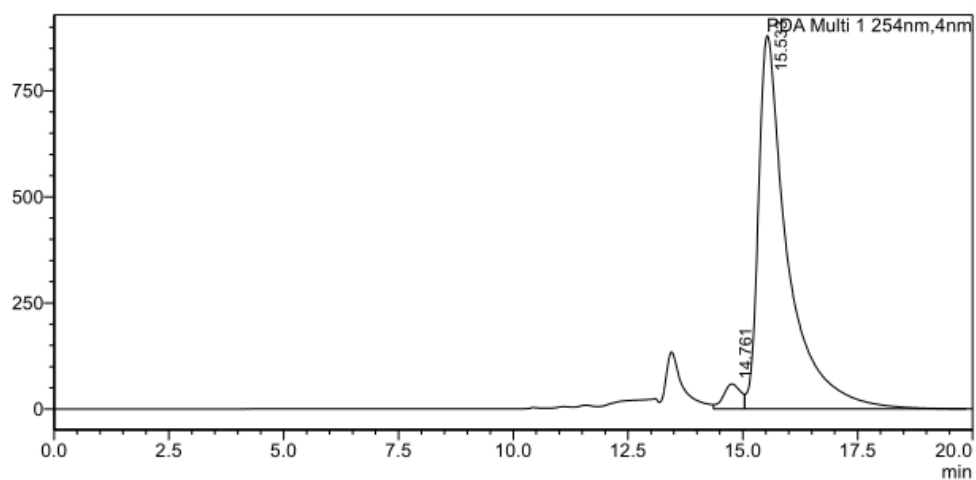

**<Peak Table>**

PDA Ch1 254nm

| Peak# | Ret. Time | Area     | Area%   | Height |
|-------|-----------|----------|---------|--------|
| 1     | 14.761    | 1548628  | 3.840   | 58715  |
| 2     | 15.533    | 38780608 | 96.160  | 879152 |
| Total |           | 40329237 | 100.000 | 937867 |

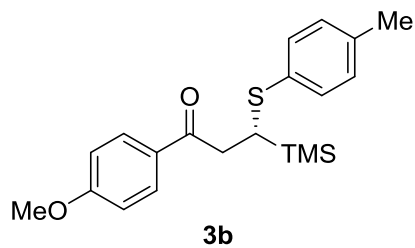

**<Chromatogram>**

mAU

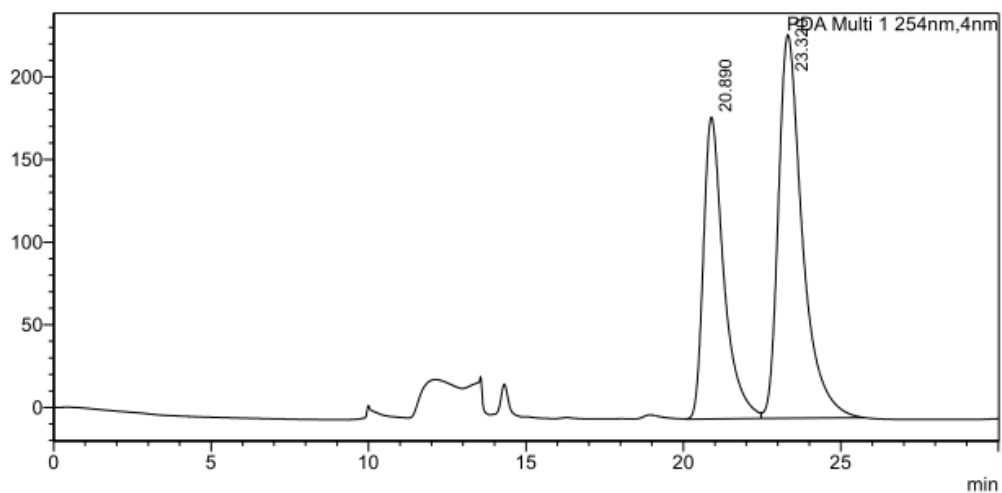

**<Peak Table>**

PDA Ch1 254nm

| Peak# | Ret. Time | Area     | Area%   | Height |
|-------|-----------|----------|---------|--------|
| 1     | 20.890    | 8218805  | 40.057  | 182537 |
| 2     | 23.320    | 12299165 | 59.943  | 231966 |
| Total |           | 20517970 | 100.000 | 414503 |

**<Chromatogram>**

mAU

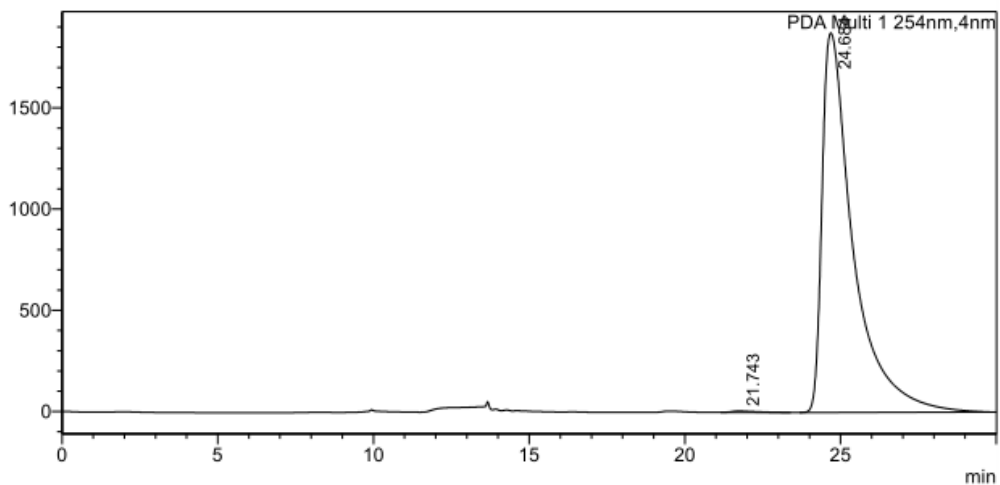

**<Peak Table>**

PDA Ch1 254nm

| Peak# | Ret. Time | Area      | Area%   | Height  |
|-------|-----------|-----------|---------|---------|
| 1     | 21.743    | 352020    | 0.270   | 6783    |
| 2     | 24.684    | 130040414 | 99.730  | 1874870 |
| Total |           | 130392434 | 100.000 | 1881653 |

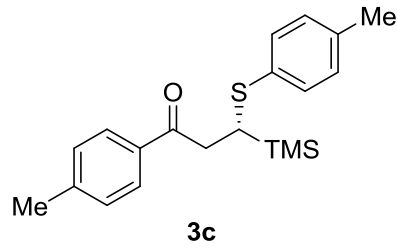

**<Chromatogram>**

mAU

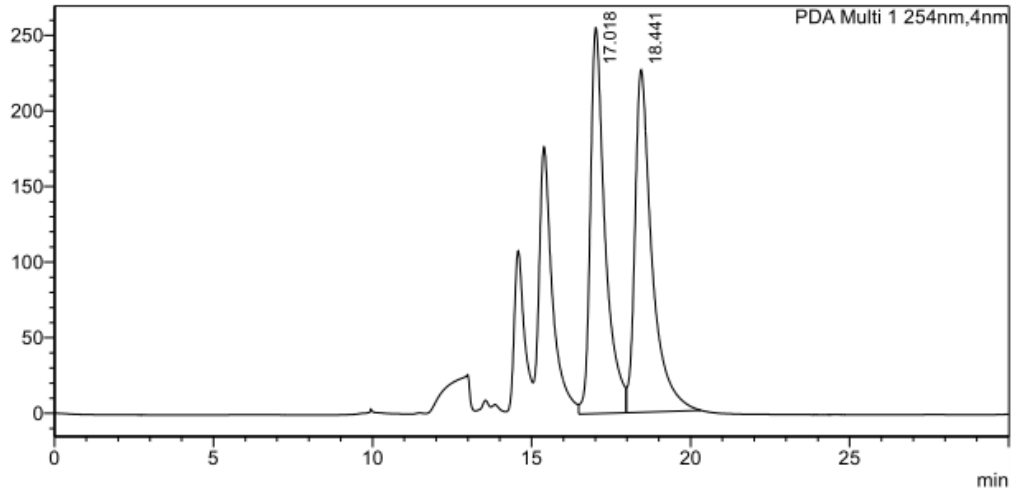

**<Peak Table>**

PDA Ch1 254nm

| Peak# | Ret. Time | Area     | Area%   | Height |
|-------|-----------|----------|---------|--------|
| 1     | 17.018    | 8228090  | 49.402  | 255180 |
| 2     | 18.441    | 8427267  | 50.598  | 226534 |
| Total |           | 16655357 | 100.000 | 481713 |

**<Chromatogram>**

mAU

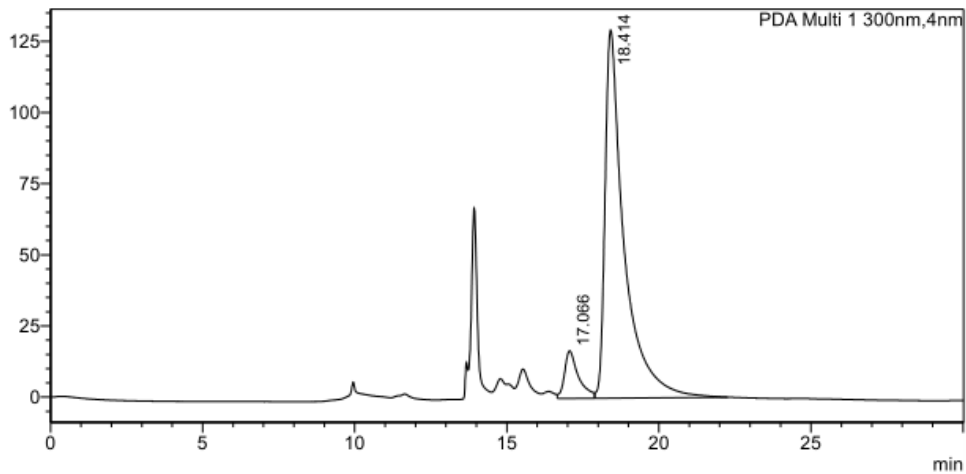

**<Peak Table>**

PDA Ch1 300nm

| Peak# | Ret. Time | Area    | Area%   | Height |
|-------|-----------|---------|---------|--------|
| 1     | 17.066    | 534434  | 8.635   | 16751  |
| 2     | 18.414    | 5655064 | 91.365  | 129392 |
| Total |           | 6189498 | 100.000 | 146143 |



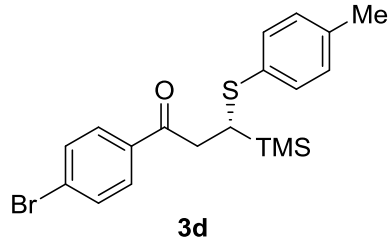

**<Chromatogram>**

mAU

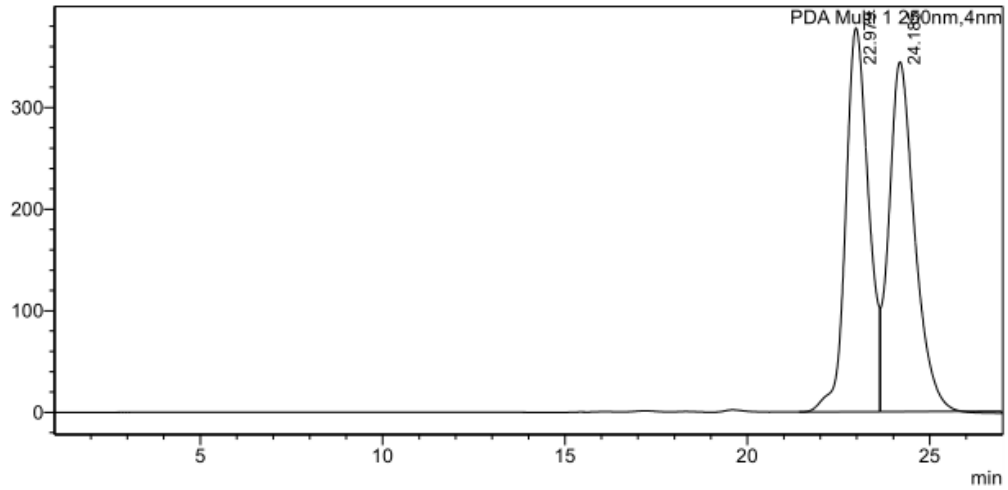

**<Peak Table>**

PDA Ch1 250nm

| Peak# | Ret. Time | Area     | Area%   | Height |
|-------|-----------|----------|---------|--------|
| 1     | 22.979    | 16548769 | 49.520  | 377557 |
| 2     | 24.185    | 16869875 | 50.480  | 344158 |
| Total |           | 33418645 | 100.000 | 721715 |

**<Chromatogram>**

mAU

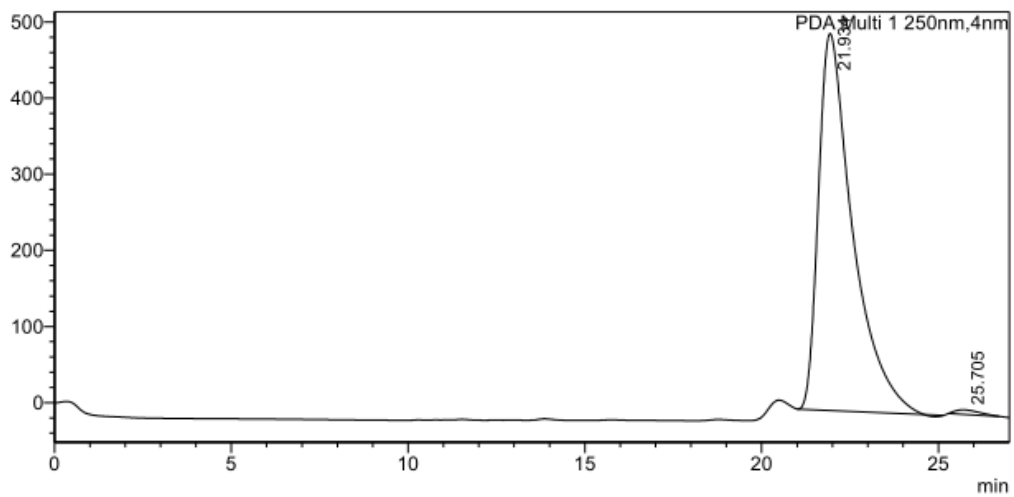

**<Peak Table>**

PDA Ch1 250nm

| Peak# | Ret. Time | Area     | Area%   | Height |
|-------|-----------|----------|---------|--------|
| 1     | 21.934    | 33359907 | 99.169  | 494941 |
| 2     | 25.705    | 279591   | 0.831   | 5866   |
| Total |           | 33639499 | 100.000 | 500807 |

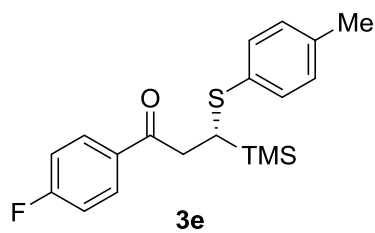

**<Chromatogram>**

mAU

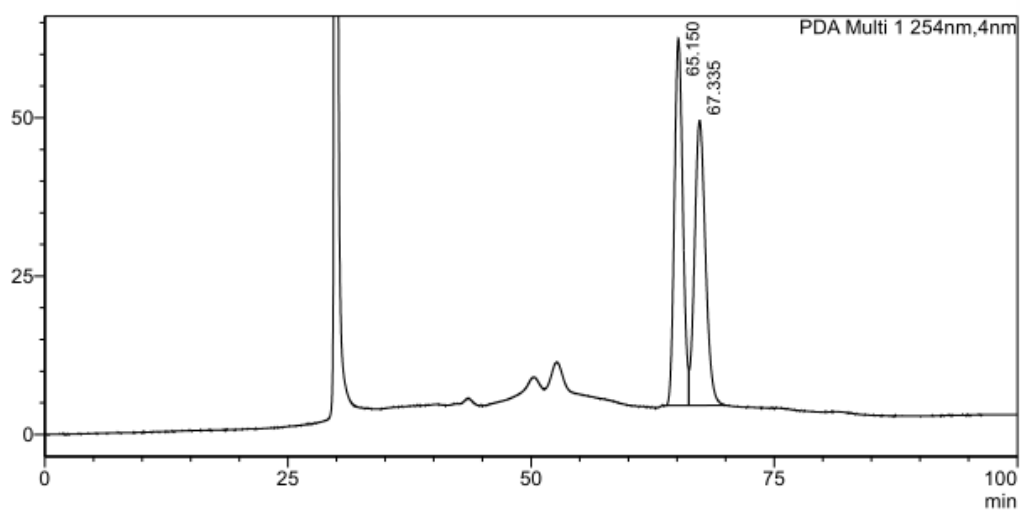

**<Peak Table>**

PDA Ch1 254nm

| Peak# | Ret. Time | Area    | Area%   | Height |
|-------|-----------|---------|---------|--------|
| 1     | 65.150    | 3490872 | 49.810  | 57954  |
| 2     | 67.335    | 3517483 | 50.190  | 44970  |
| Total |           | 7008355 | 100.000 | 102923 |

**<Chromatogram>**

mAU

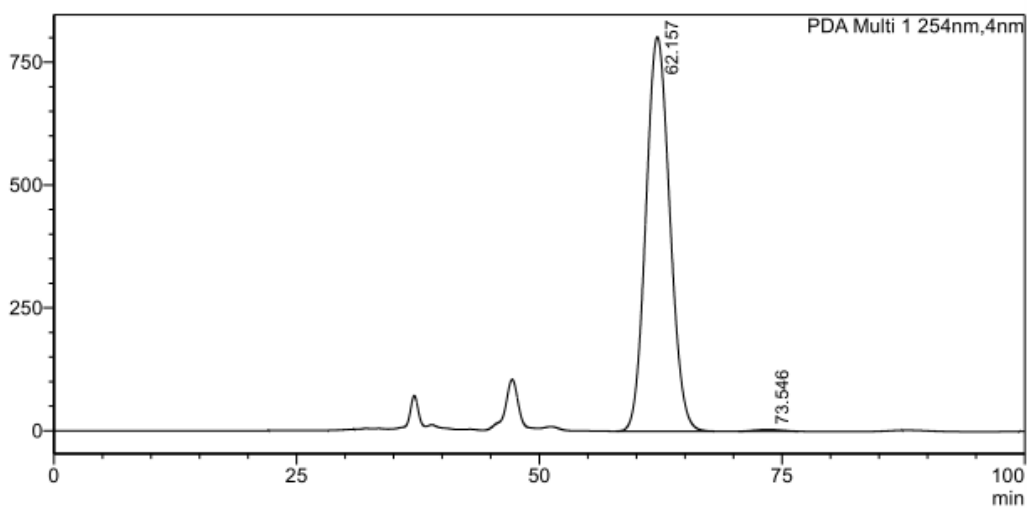

**<Peak Table>**

PDA Ch1 254nm

| Peak# | Ret. Time | Area      | Area%   | Height |
|-------|-----------|-----------|---------|--------|
| 1     | 62.157    | 137433536 | 99.506  | 802291 |
| 2     | 73.546    | 682588    | 0.494   | 3578   |
| Total |           | 138116124 | 100.000 | 805868 |

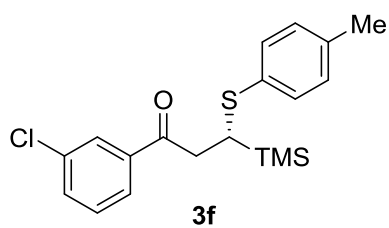

**<Chromatogram>**

mAU

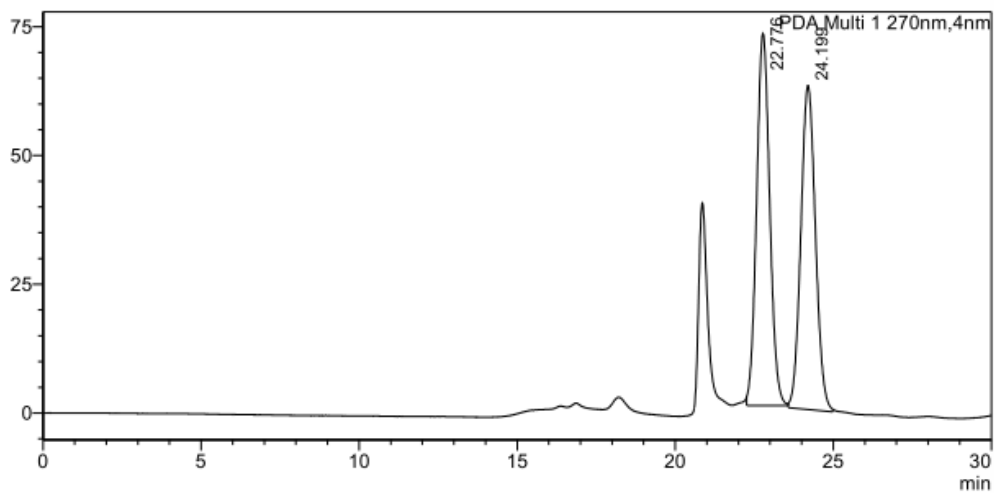

**<Peak Table>**

PDA Ch1 270nm

| Peak# | Ret. Time | Area    | Area%   | Height |
|-------|-----------|---------|---------|--------|
| 1     | 22.776    | 2082464 | 50.744  | 72204  |
| 2     | 24.199    | 2021394 | 49.256  | 62886  |
| Total |           | 4103857 | 100.000 | 135090 |

**<Chromatogram>**

mAU

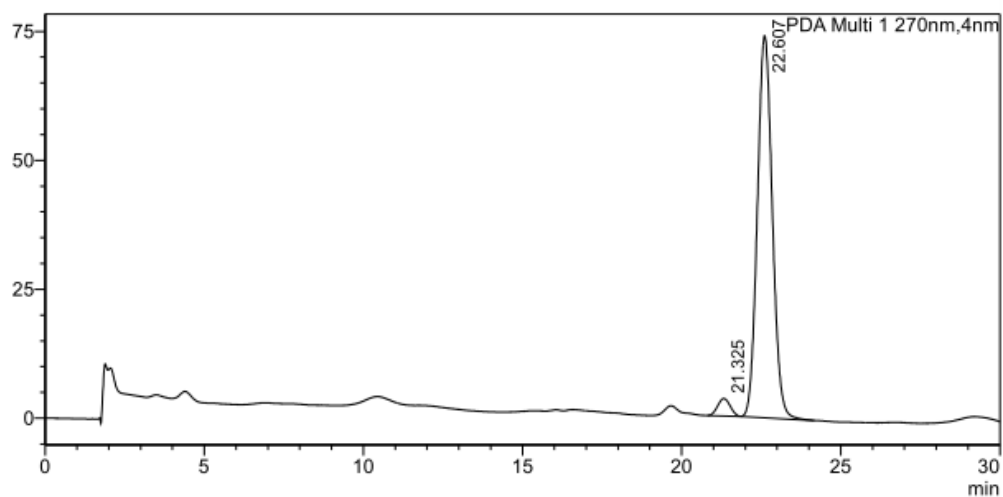

**<Peak Table>**

PDA Ch1 270nm

| Peak# | Ret. Time | Area    | Area%   | Height |
|-------|-----------|---------|---------|--------|
| 1     | 21.325    | 92628   | 3.684   | 3392   |
| 2     | 22.607    | 2421794 | 96.316  | 74049  |
| Total |           | 2514423 | 100.000 | 77440  |

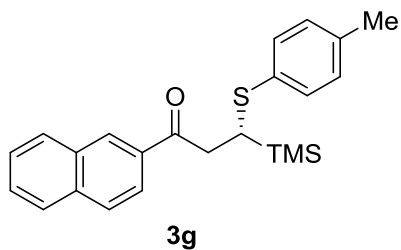

**<Chromatogram>**

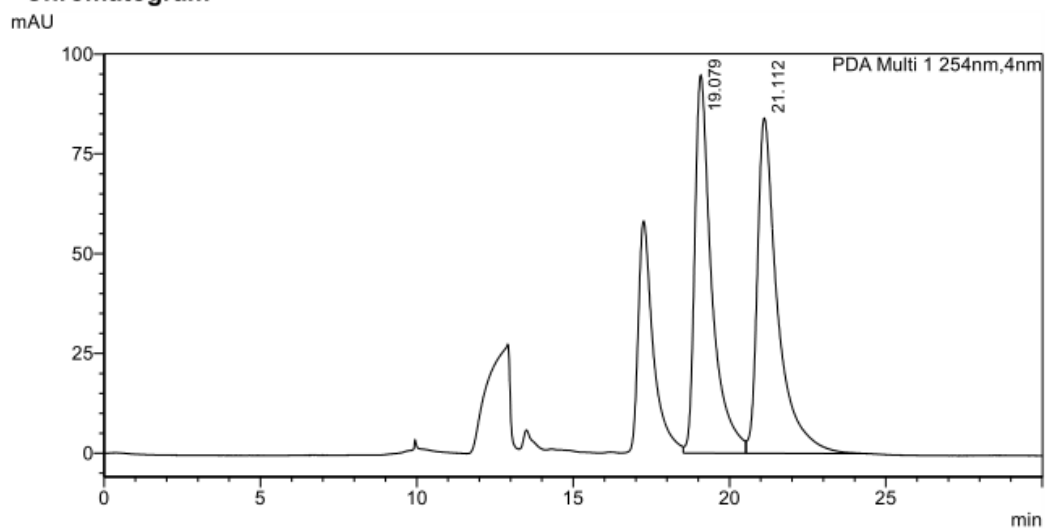

**<Peak Table>**

PDA Ch1 254nm

| Peak# | Ret. Time | Area    | Area%   | Height |
|-------|-----------|---------|---------|--------|
| 1     | 19.079    | 3578551 | 48.678  | 94695  |
| 2     | 21.112    | 3772859 | 51.322  | 83954  |
| Total |           | 7351410 | 100.000 | 178649 |

**<Chromatogram>**

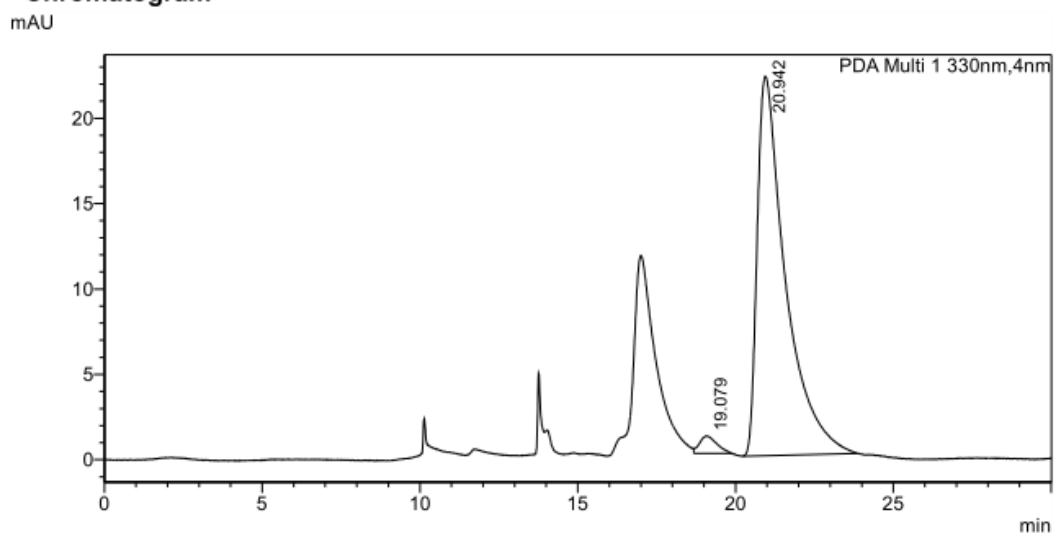

**<Peak Table>**

PDA Ch1 330nm

| Peak# | Ret. Time | Area    | Area%   | Height |
|-------|-----------|---------|---------|--------|
| 1     | 19.079    | 38767   | 2.722   | 1019   |
| 2     | 20.942    | 1385274 | 97.278  | 22214  |
| Total |           | 1424041 | 100.000 | 23234  |

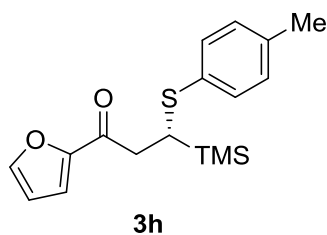

**<Chromatogram>**

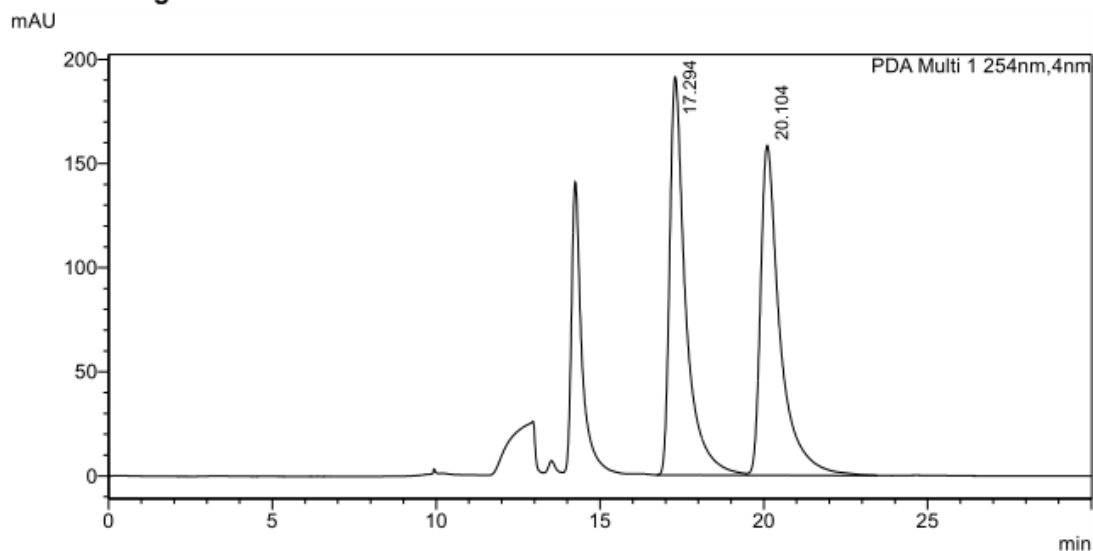

**<Peak Table>**

PDA Ch1 254nm

| Peak# | Ret. Time | Area     | Area%   | Height |
|-------|-----------|----------|---------|--------|
| 1     | 17.294    | 6493004  | 49.828  | 191138 |
| 2     | 20.104    | 6537718  | 50.172  | 158399 |
| Total |           | 13030723 | 100.000 | 349536 |

**<Chromatogram>**

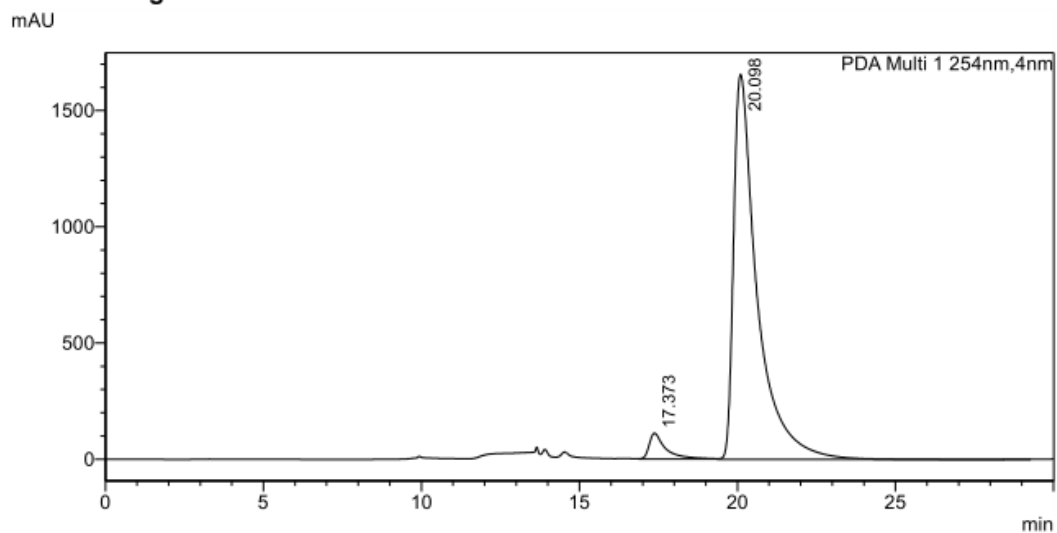

**<Peak Table>**

PDA Ch1 254nm

| Peak# | Ret. Time | Area     | Area%   | Height  |
|-------|-----------|----------|---------|---------|
| 1     | 17.373    | 4095681  | 4.546   | 111324  |
| 2     | 20.098    | 85994142 | 95.454  | 1656125 |
| Total |           | 90089822 | 100.000 | 1767449 |

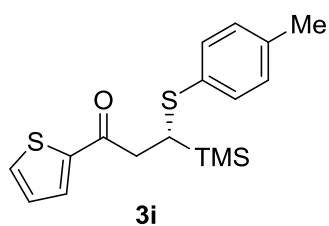

**<Chromatogram>**

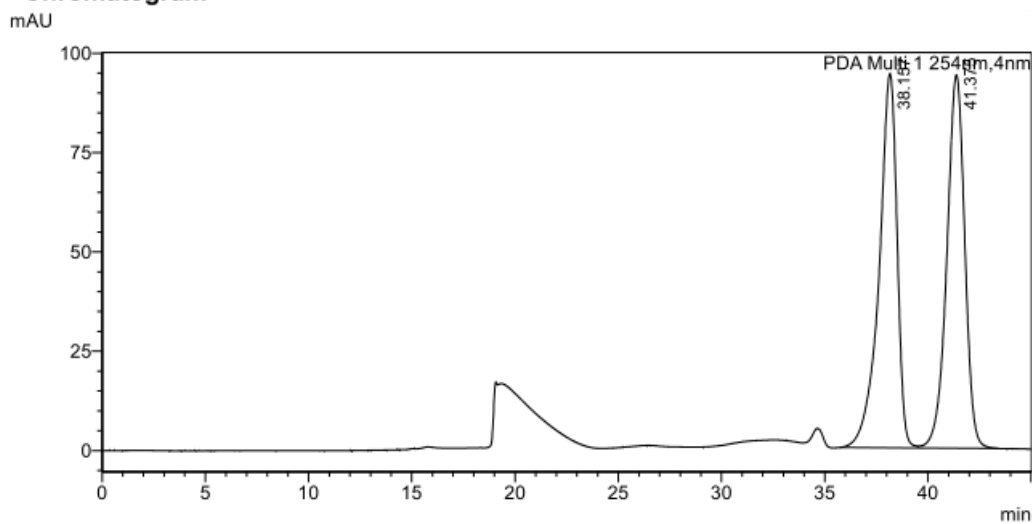

**<Peak Table>**

PDA Ch1 254nm

| Peak# | Ret. Time | Area     | Area%   | Height |
|-------|-----------|----------|---------|--------|
| 1     | 38.157    | 5709408  | 50.123  | 94176  |
| 2     | 41.375    | 5681409  | 49.877  | 93949  |
| Total |           | 11390818 | 100.000 | 188125 |

**<Chromatogram>**

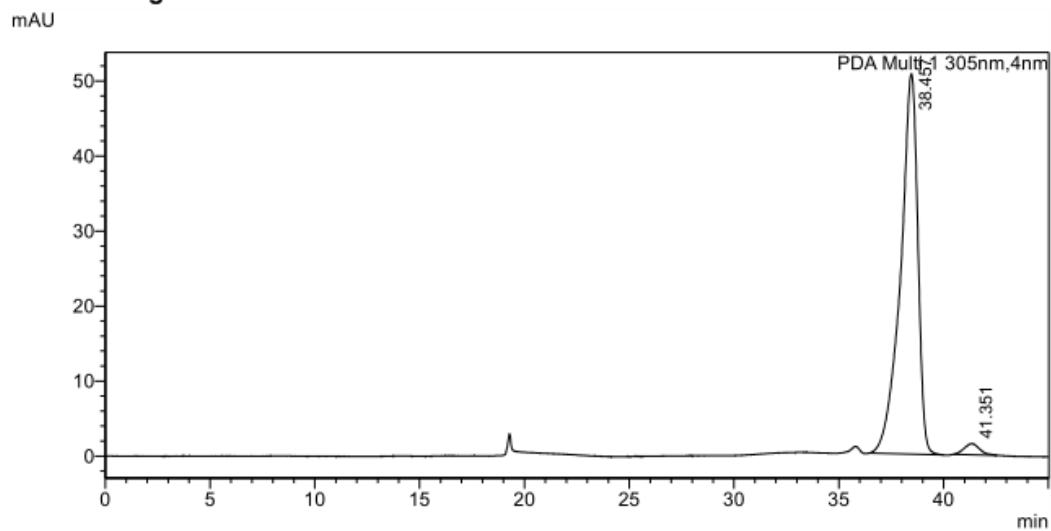

**<Peak Table>**

PDA Ch1 305nm

| Peak# | Ret. Time | Area    | Area%   | Height |
|-------|-----------|---------|---------|--------|
| 1     | 38.457    | 2902104 | 97.451  | 50712  |
| 2     | 41.351    | 75908   | 2.549   | 1476   |
| Total |           | 2978012 | 100.000 | 52188  |



**<Chromatogram>**

mAU

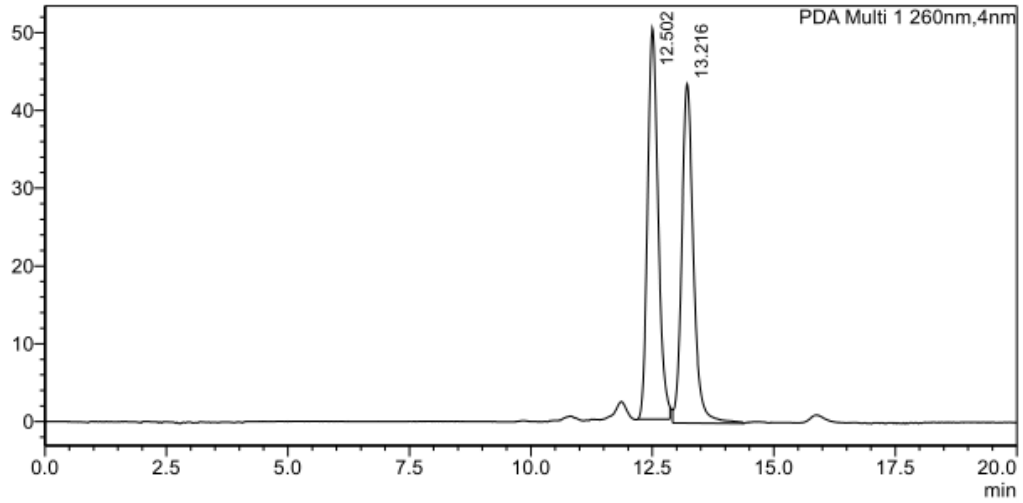

**<Peak Table>**

PDA Ch1 260nm

| Peak# | Ret. Time | Area    | Area%   | Height |
|-------|-----------|---------|---------|--------|
| 1     | 12.502    | 759683  | 50.980  | 50277  |
| 2     | 13.216    | 730466  | 49.020  | 43600  |
| Total |           | 1490149 | 100.000 | 93878  |

**<Chromatogram>**

mAU

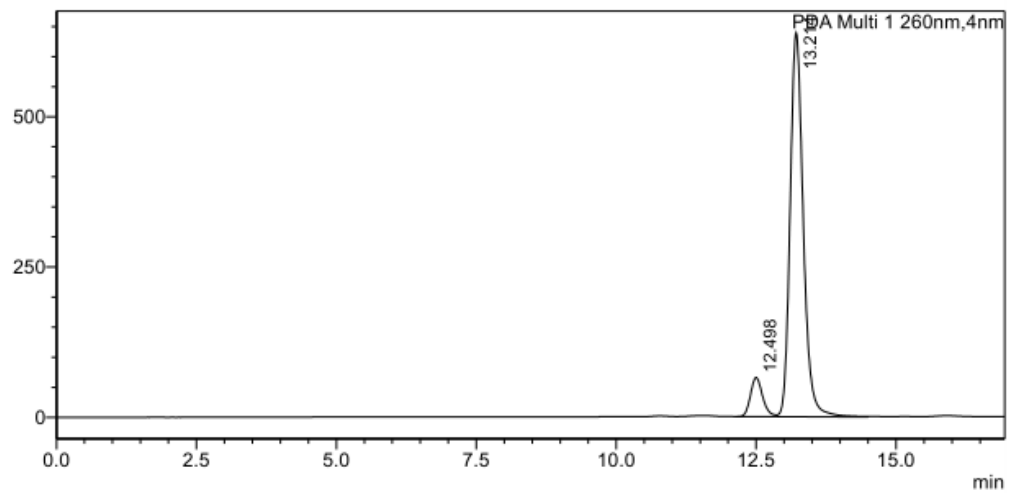

**<Peak Table>**

PDA Ch1 260nm

| Peak# | Ret. Time | Area     | Area%   | Height |
|-------|-----------|----------|---------|--------|
| 1     | 12.498    | 990602   | 8.656   | 65165  |
| 2     | 13.214    | 10453229 | 91.344  | 638762 |
| Total |           | 11443831 | 100.000 | 703927 |

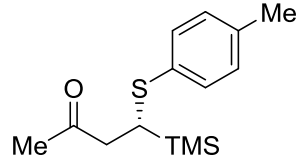

3k

<Chromatogram>

mAU

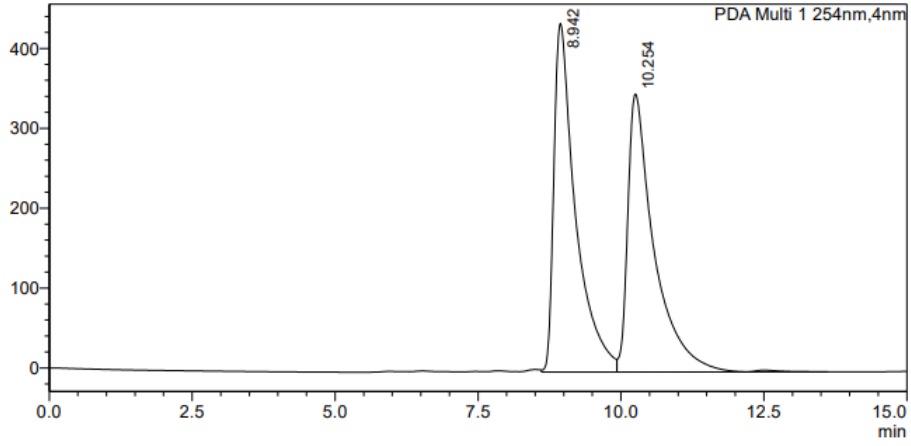

<Peak Table>

PDA Ch1 254nm

| Peak# | Ret. Time | Area     | Area%   | Height |
|-------|-----------|----------|---------|--------|
| 1     | 8.942     | 11527446 | 50.813  | 436151 |
| 2     | 10.254    | 11158533 | 49.187  | 348053 |
| Total |           | 22685979 | 100.000 | 784204 |

<Chromatogram>

mAU

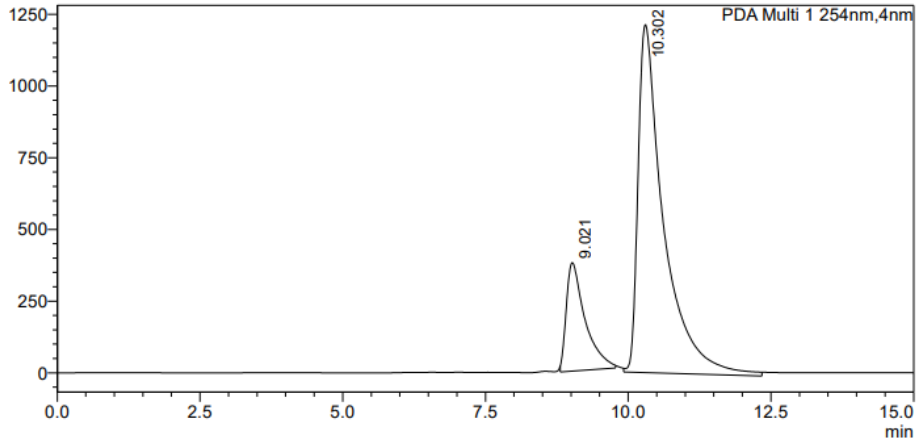

<Peak Table>

PDA Ch1 254nm

| Peak# | Ret. Time | Area     | Area%   | Height  |
|-------|-----------|----------|---------|---------|
| 1     | 9.021     | 8651222  | 18.623  | 378379  |
| 2     | 10.302    | 37802140 | 81.377  | 1212863 |
| Total |           | 46453362 | 100.000 | 1591242 |



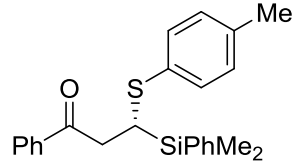

3I

<Chromatogram>

mAU

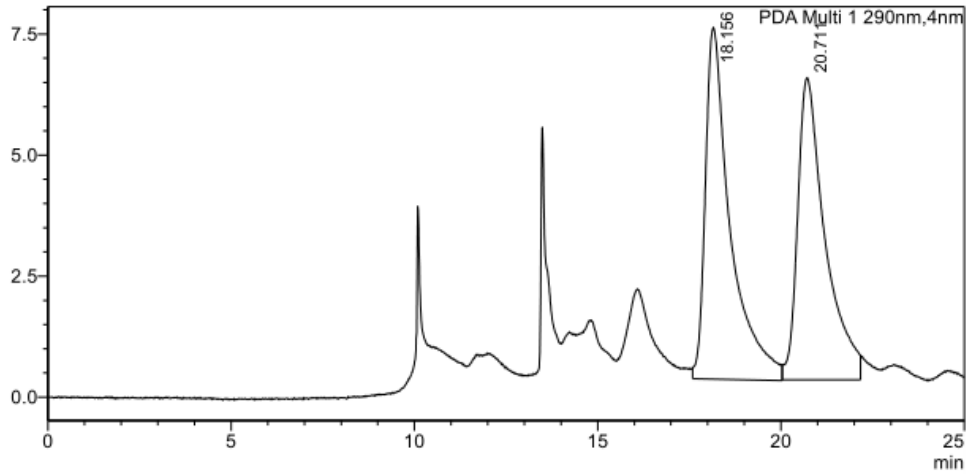

<Peak Table>

PDA Ch1 290nm

| Peak# | Ret. Time | Area   | Area%   | Height |
|-------|-----------|--------|---------|--------|
| 1     | 18.156    | 344234 | 51.437  | 7261   |
| 2     | 20.711    | 325003 | 48.563  | 6234   |
| Total |           | 669238 | 100.000 | 13496  |

<Chromatogram>

mAU

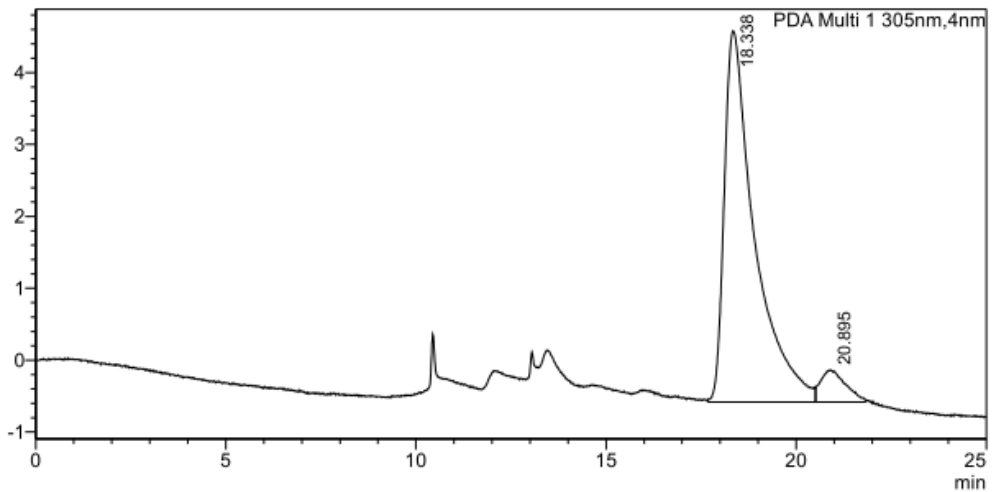

<Peak Table>

PDA Ch1 305nm

| Peak# | Ret. Time | Area   | Area%   | Height |
|-------|-----------|--------|---------|--------|
| 1     | 18.338    | 285370 | 93.342  | 5162   |
| 2     | 20.895    | 20354  | 6.658   | 445    |
| Total |           | 305724 | 100.000 | 5607   |

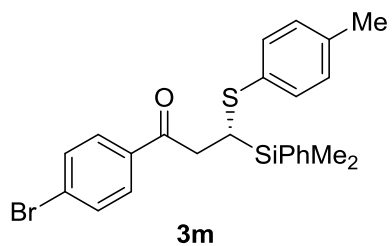

**<Chromatogram>**

mAU

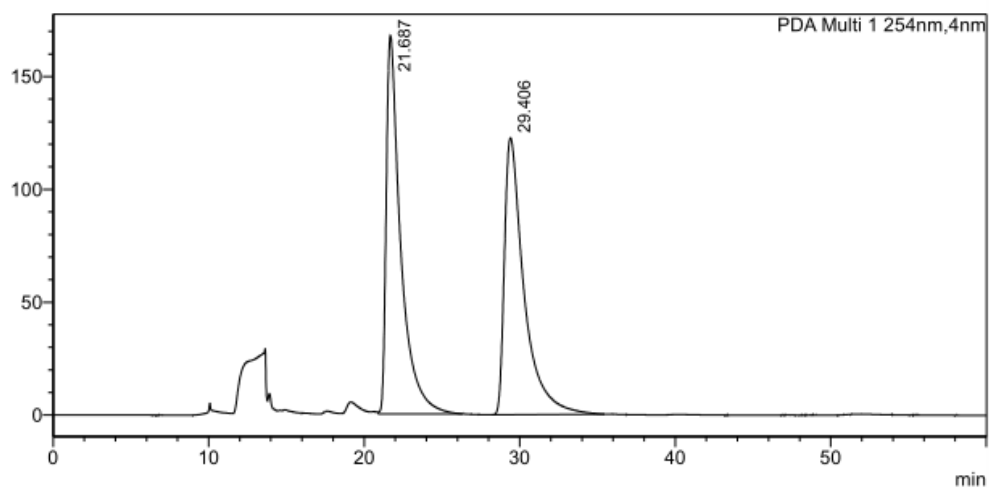

**<Peak Table>**

PDA Ch1 254nm

| Peak# | Ret. Time | Area     | Area%   | Height |
|-------|-----------|----------|---------|--------|
| 1     | 21.687    | 10835607 | 50.211  | 167676 |
| 2     | 29.406    | 10744664 | 49.789  | 122753 |
| Total |           | 21580270 | 100.000 | 290429 |

**<Chromatogram>**

mAU

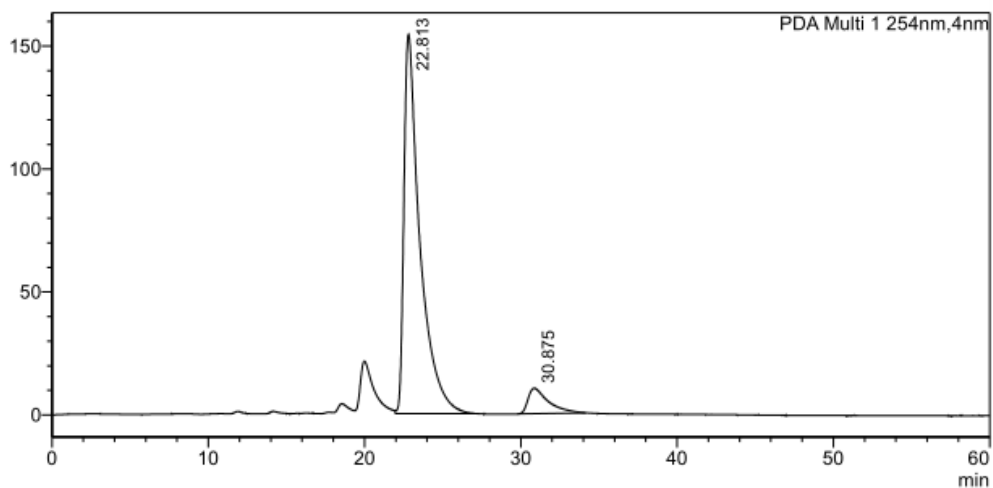

**<Peak Table>**

PDA Ch1 254nm

| Peak# | Ret. Time | Area     | Area%   | Height |
|-------|-----------|----------|---------|--------|
| 1     | 22.813    | 10988359 | 92.165  | 154349 |
| 2     | 30.875    | 934155   | 7.835   | 10351  |
| Total |           | 11922514 | 100.000 | 164700 |

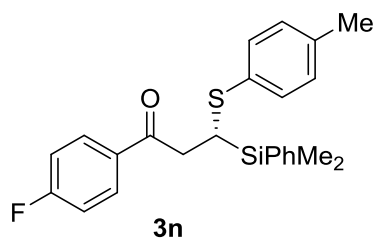

**<Chromatogram>**

mAU

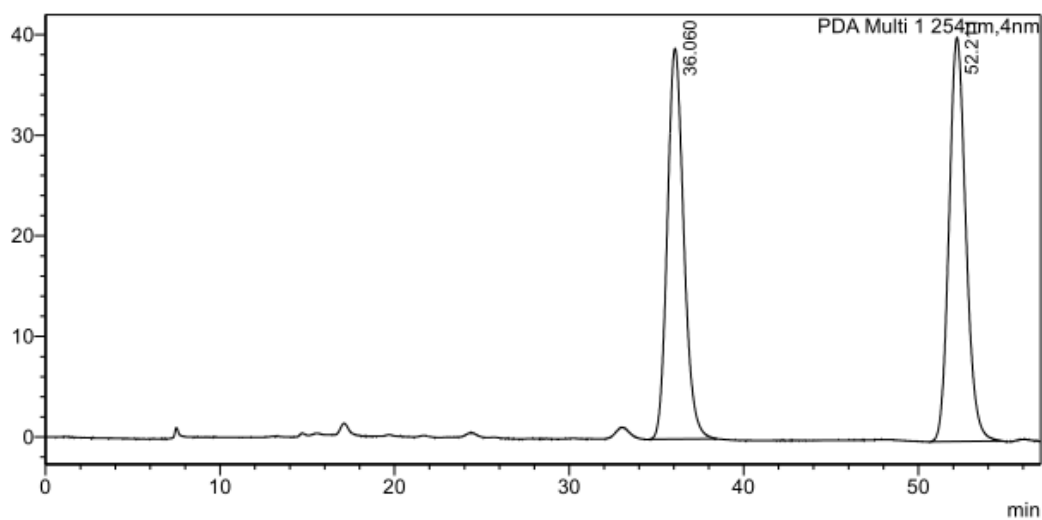

**<Peak Table>**

PDA Ch1 254nm

| Peak# | Ret. Time | Area    | Area%   | Height |
|-------|-----------|---------|---------|--------|
| 1     | 36.060    | 2539125 | 48.549  | 38806  |
| 2     | 52.211    | 2690920 | 51.451  | 40138  |
| Total |           | 5230045 | 100.000 | 78945  |

**<Chromatogram>**

mAU

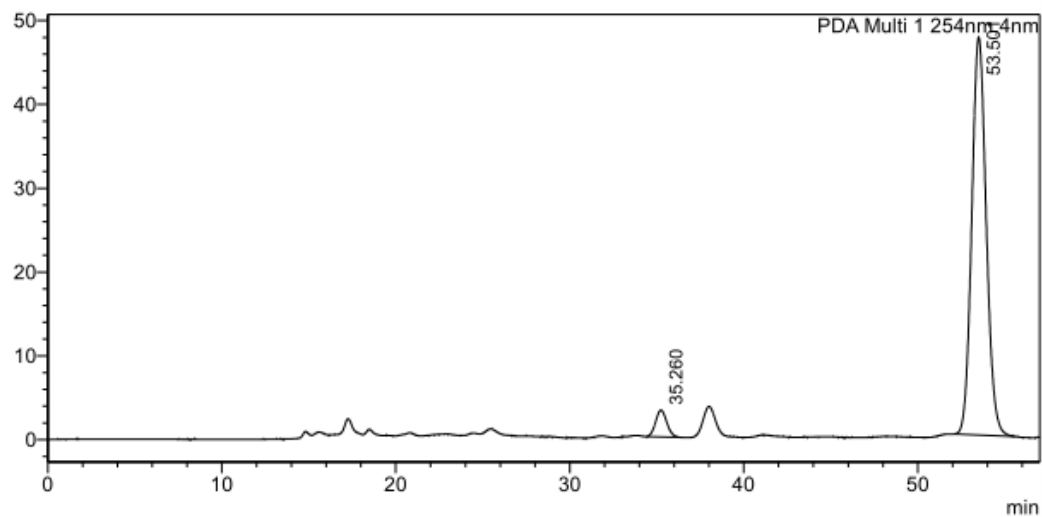

**<Peak Table>**

PDA Ch1 254nm

| Peak# | Ret. Time | Area    | Area%   | Height |
|-------|-----------|---------|---------|--------|
| 1     | 35.260    | 141873  | 4.909   | 3191   |
| 2     | 53.501    | 2748252 | 95.091  | 47485  |
| Total |           | 2890125 | 100.000 | 50676  |

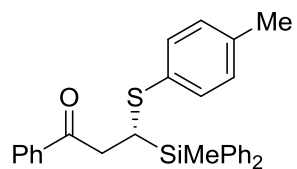

**3o**

**<Chromatogram>**

mAU

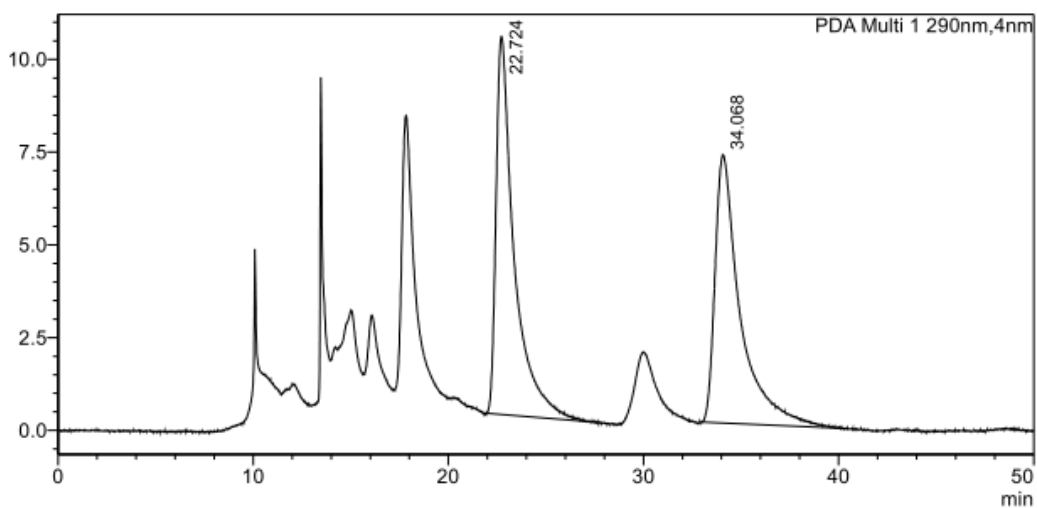

**<Peak Table>**

PDA Ch1 290nm

| Peak# | Ret. Time | Area    | Area%   | Height |
|-------|-----------|---------|---------|--------|
| 1     | 22.724    | 657282  | 50.426  | 10185  |
| 2     | 34.068    | 646181  | 49.574  | 7220   |
| Total |           | 1303462 | 100.000 | 17405  |

**<Chromatogram>**

mAU

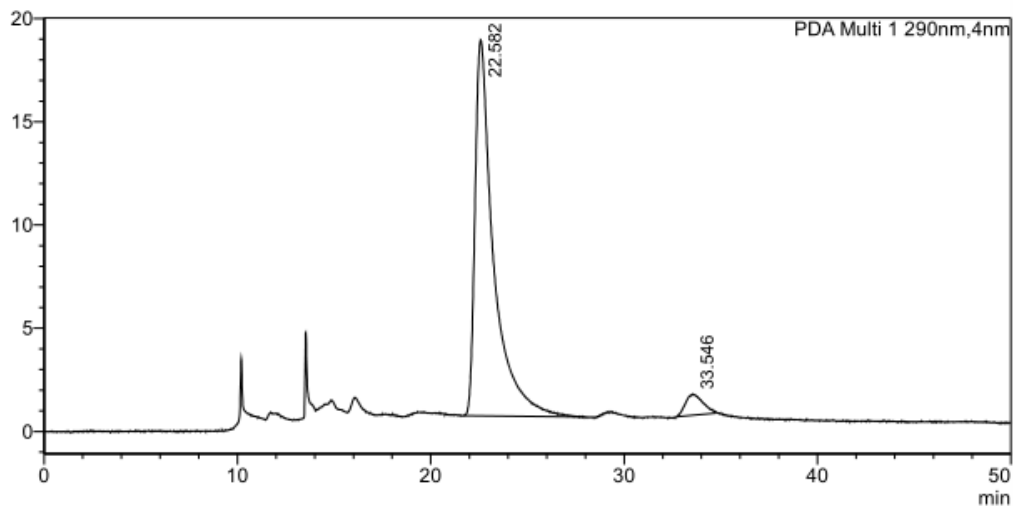

**<Peak Table>**

PDA Ch1 290nm

| Peak# | Ret. Time | Area    | Area%   | Height |
|-------|-----------|---------|---------|--------|
| 1     | 22.582    | 1211779 | 95.010  | 18199  |
| 2     | 33.546    | 63648   | 4.990   | 1000   |
| Total |           | 1275427 | 100.000 | 19199  |

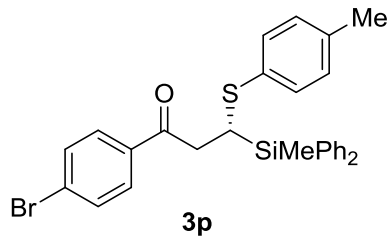

**<Chromatogram>**

mAU

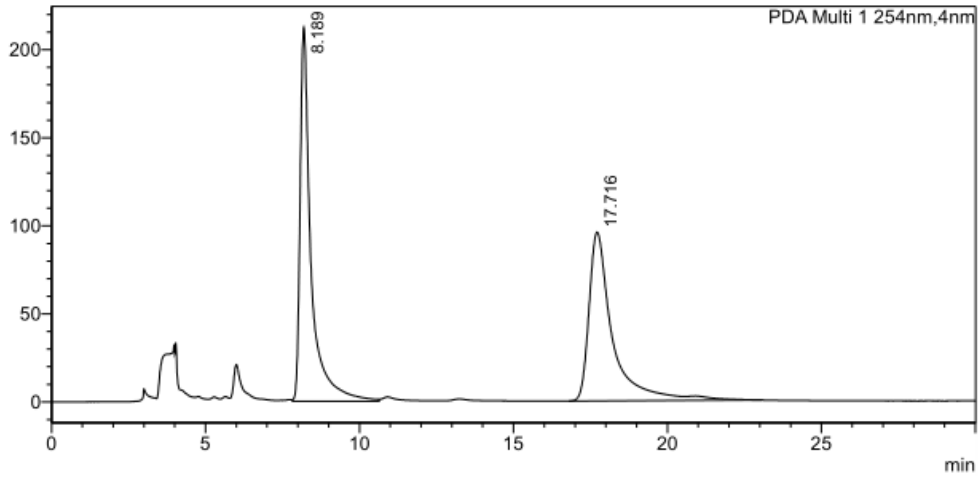

**<Peak Table>**

PDA Ch1 254nm

| Peak# | Ret. Time | Area     | Area%   | Height |
|-------|-----------|----------|---------|--------|
| 1     | 8.189     | 5232353  | 50.596  | 212254 |
| 2     | 17.716    | 5109006  | 49.404  | 95801  |
| Total |           | 10341358 | 100.000 | 308055 |

**<Chromatogram>**

mAU

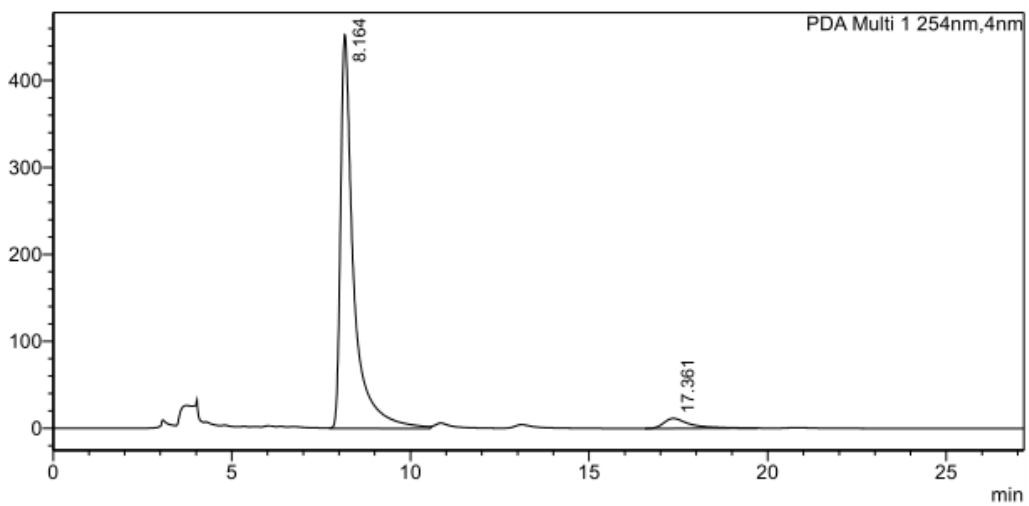

**<Peak Table>**

PDA Ch1 254nm

| Peak# | Ret. Time | Area     | Area%   | Height |
|-------|-----------|----------|---------|--------|
| 1     | 8.164     | 11544524 | 95.181  | 452899 |
| 2     | 17.361    | 584510   | 4.819   | 11470  |
| Total |           | 12129034 | 100.000 | 464369 |

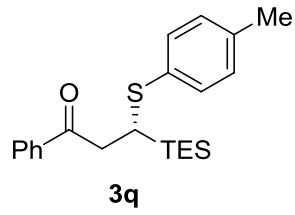

**<Chromatogram>**

mAU

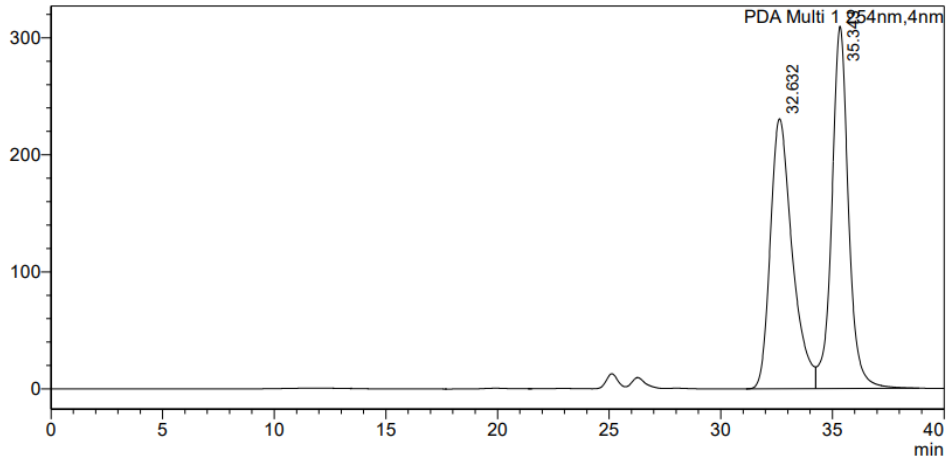

**<Peak Table>**

PDA Ch1 254nm

| Peak# | Ret. Time | Area     | Area%   | Height |
|-------|-----------|----------|---------|--------|
| 1     | 32.632    | 15795983 | 49.551  | 230662 |
| 2     | 35.343    | 16082071 | 50.449  | 309465 |
| Total |           | 31878055 | 100.000 | 540127 |

**<Chromatogram>**

mAU

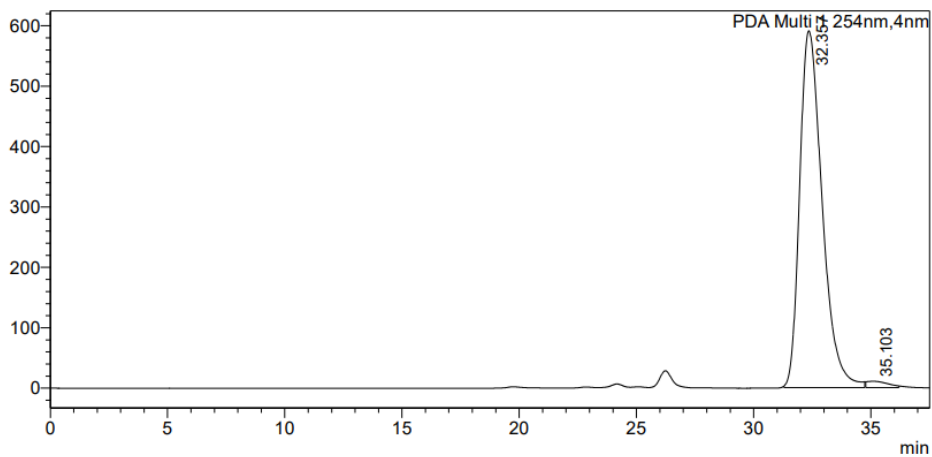

**<Peak Table>**

PDA Ch1 254nm

| Peak# | Ret. Time | Area     | Area%   | Height |
|-------|-----------|----------|---------|--------|
| 1     | 32.357    | 39337528 | 98.402  | 590462 |
| 2     | 35.103    | 638642   | 1.598   | 10300  |
| Total |           | 39976170 | 100.000 | 600761 |

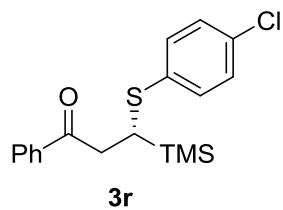

**<Chromatogram>**

mAU

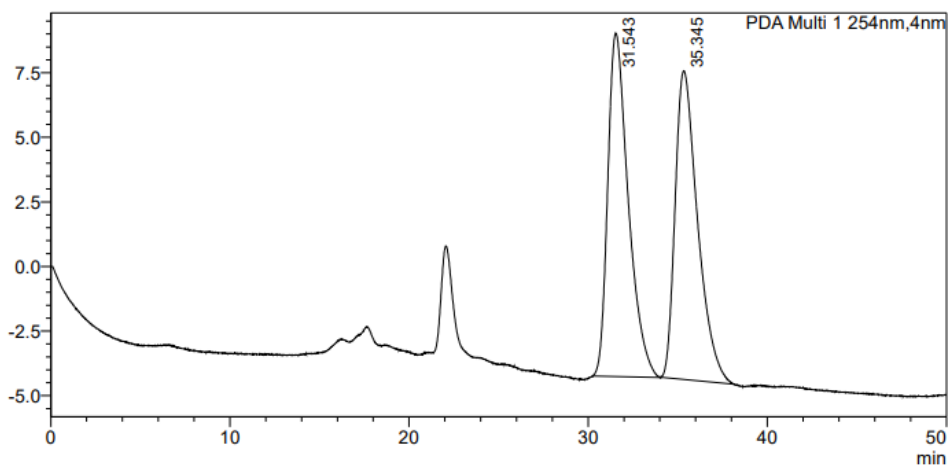

**<Peak Table>**

PDA Ch1 254nm

| Peak# | Ret. Time | Area    | Area%   | Height |
|-------|-----------|---------|---------|--------|
| 1     | 31.543    | 1058906 | 50.403  | 13291  |
| 2     | 35.345    | 1041977 | 49.597  | 11946  |
| Total |           | 2100883 | 100.000 | 25237  |

**<Chromatogram>**

mAU

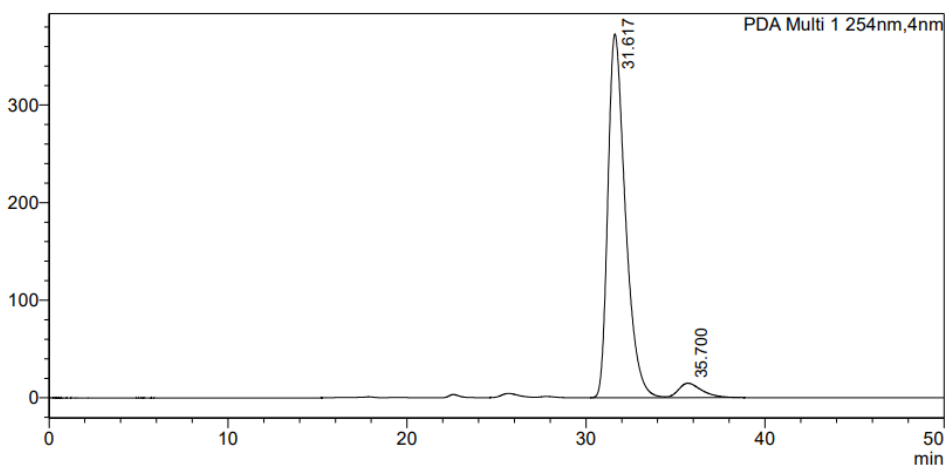

**<Peak Table>**

PDA Ch1 254nm

| Peak# | Ret. Time | Area     | Area%   | Height |
|-------|-----------|----------|---------|--------|
| 1     | 31.617    | 25293424 | 94.974  | 372716 |
| 2     | 35.700    | 1338394  | 5.026   | 14766  |
| Total |           | 26631818 | 100.000 | 387482 |

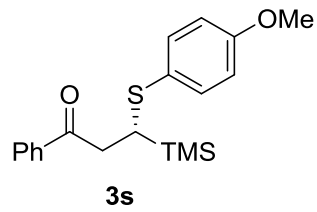

**<Chromatogram>**

mAU

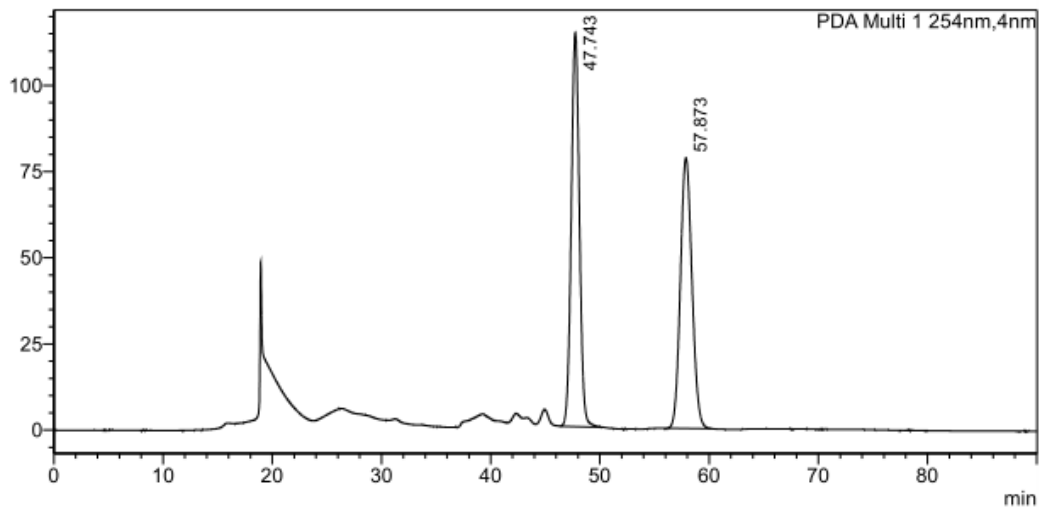

**<Peak Table>**

PDA Ch1 254nm

| Peak# | Ret. Time | Area     | Area%   | Height |
|-------|-----------|----------|---------|--------|
| 1     | 47.743    | 5937768  | 50.715  | 114371 |
| 2     | 57.873    | 5770367  | 49.285  | 78515  |
| Total |           | 11708136 | 100.000 | 192886 |

**<Chromatogram>**

mAU

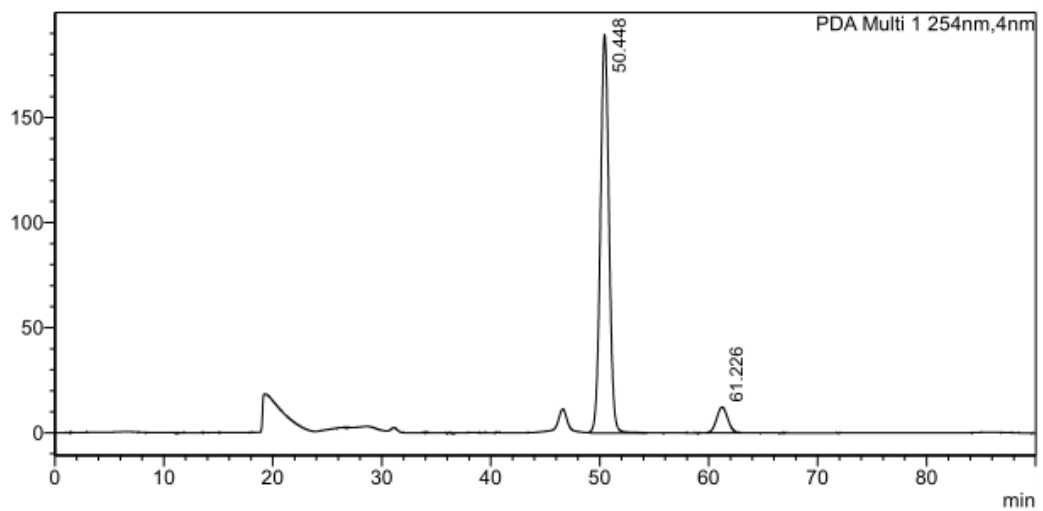

**<Peak Table>**

PDA Ch1 254nm

| Peak# | Ret. Time | Area     | Area%   | Height |
|-------|-----------|----------|---------|--------|
| 1     | 50.448    | 10398147 | 92.365  | 189396 |
| 2     | 61.226    | 859489   | 7.635   | 12227  |
| Total |           | 11257637 | 100.000 | 201623 |



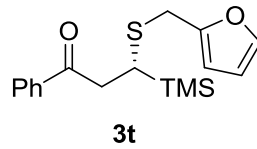

**<Chromatogram>**

mAU

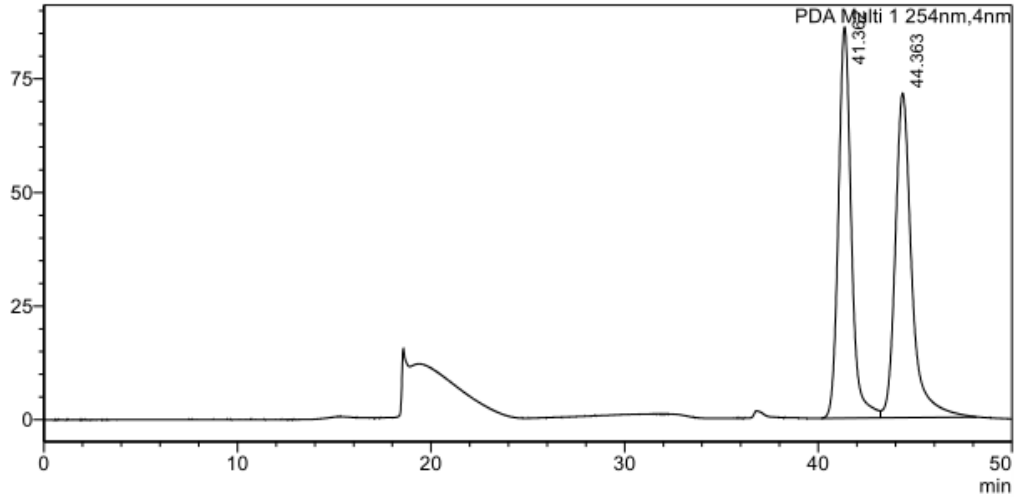

**<Peak Table>**

PDA Ch1 254nm

| Peak# | Ret. Time | Area    | Area%   | Height |
|-------|-----------|---------|---------|--------|
| 1     | 41.362    | 3974228 | 48.462  | 86028  |
| 2     | 44.363    | 4226515 | 51.538  | 71401  |
| Total |           | 8200743 | 100.000 | 157429 |

**<Chromatogram>**

mAU

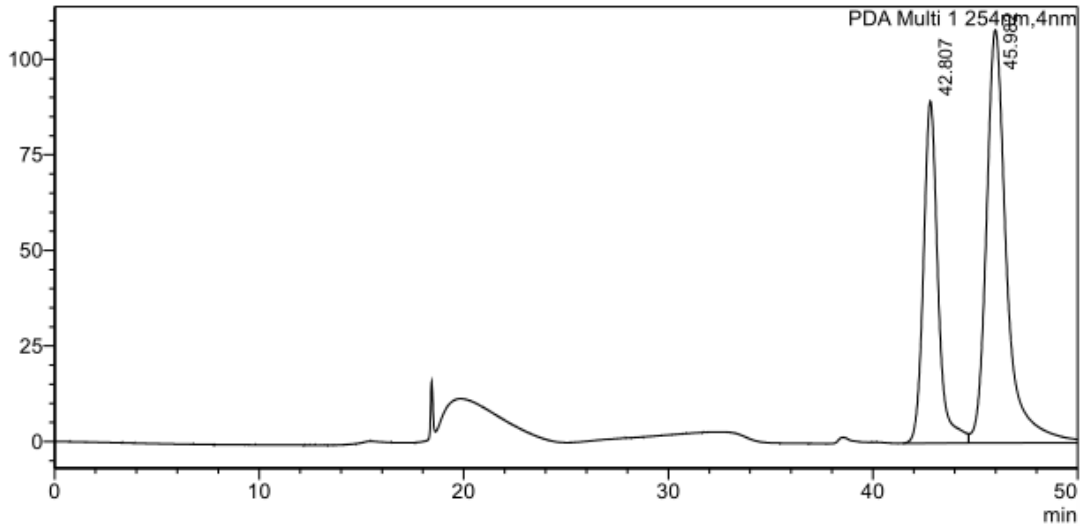

**<Peak Table>**

PDA Ch1 254nm

| Peak# | Ret. Time | Area     | Area%   | Height |
|-------|-----------|----------|---------|--------|
| 1     | 42.807    | 4435099  | 37.282  | 89476  |
| 2     | 45.982    | 7461146  | 62.718  | 108028 |
| Total |           | 11896245 | 100.000 | 197504 |

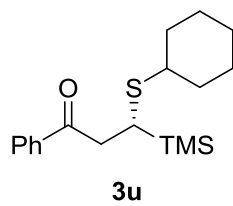

**<Chromatogram>**

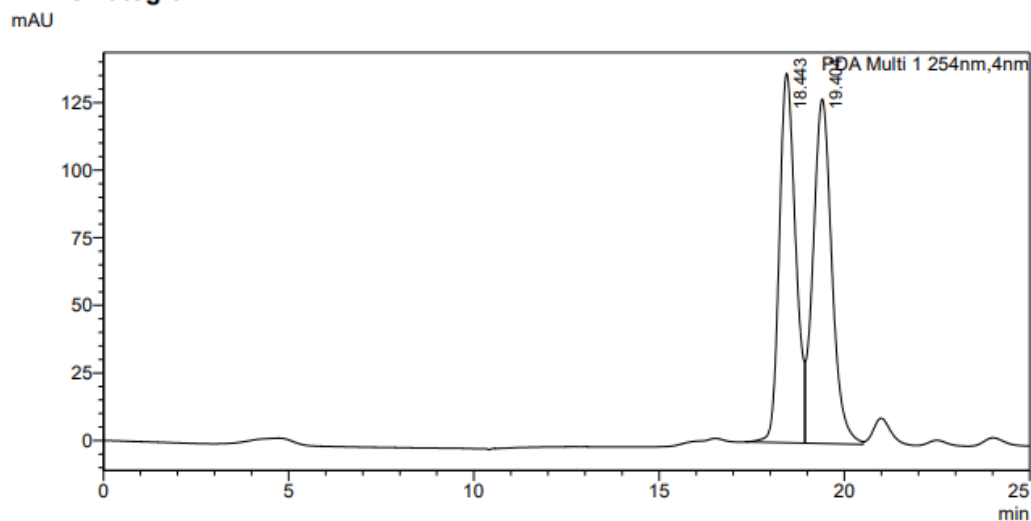

**<Peak Table>**

PDA Ch1 254nm

| Peak# | Ret. Time | Area    | Area%   | Height |
|-------|-----------|---------|---------|--------|
| 1     | 18.443    | 4179183 | 48.130  | 136592 |
| 2     | 19.404    | 4503969 | 51.870  | 127399 |
| Total |           | 8683152 | 100.000 | 263991 |

**<Chromatogram>**

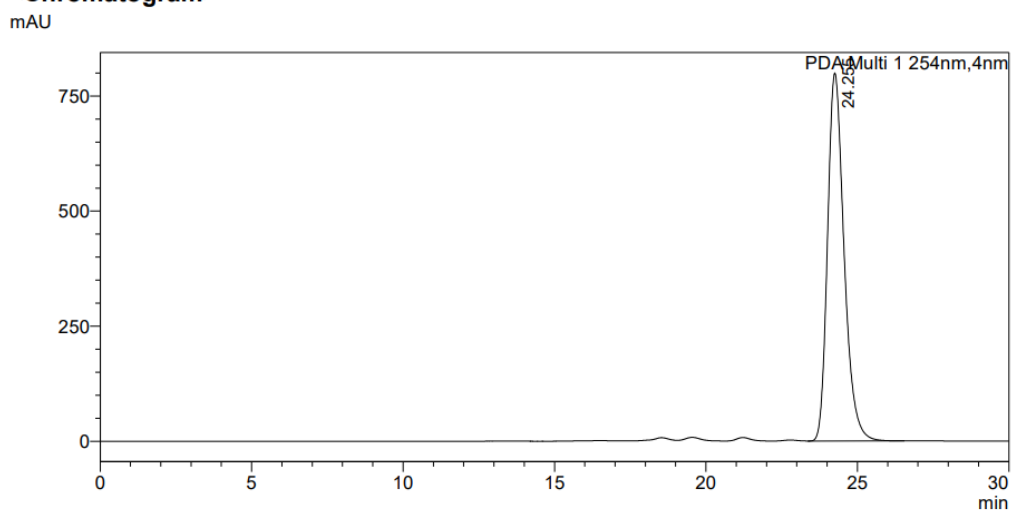

**<Peak Table>**

PDA Ch1 254nm

| Peak# | Ret. Time | Area     | Area%   | Height |
|-------|-----------|----------|---------|--------|
| 1     | 24.255    | 30343869 | 100.000 | 799335 |
| Total |           | 30343869 | 100.000 | 799335 |

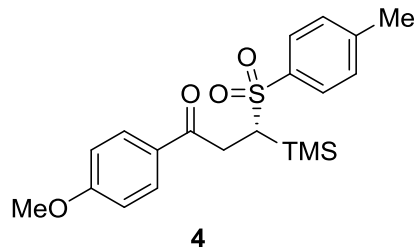

**<Chromatogram>**

mAU

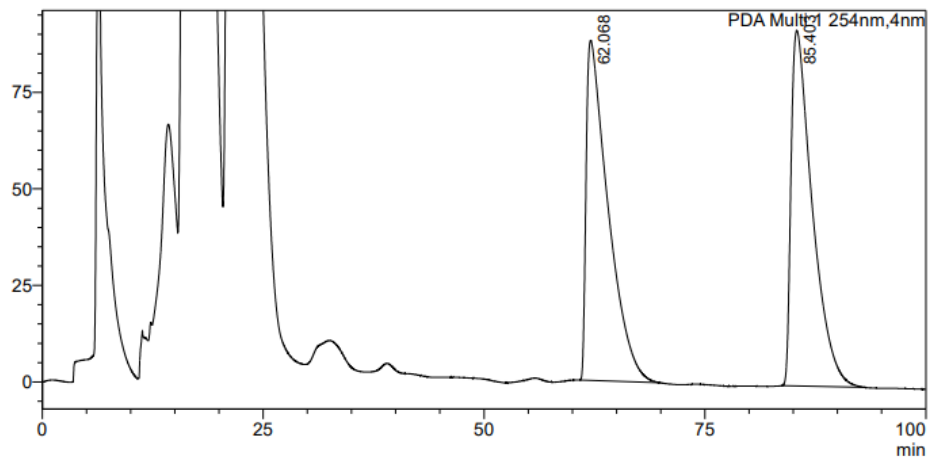

**<Peak Table>**

PDA Ch1 254nm

| Peak# | Ret. Time | Area     | Area%   | Height |
|-------|-----------|----------|---------|--------|
| 1     | 62.068    | 15201578 | 49.653  | 88036  |
| 2     | 85.403    | 15413838 | 50.347  | 92080  |
| Total |           | 30615416 | 100.000 | 180116 |

**<Chromatogram>**

mAU

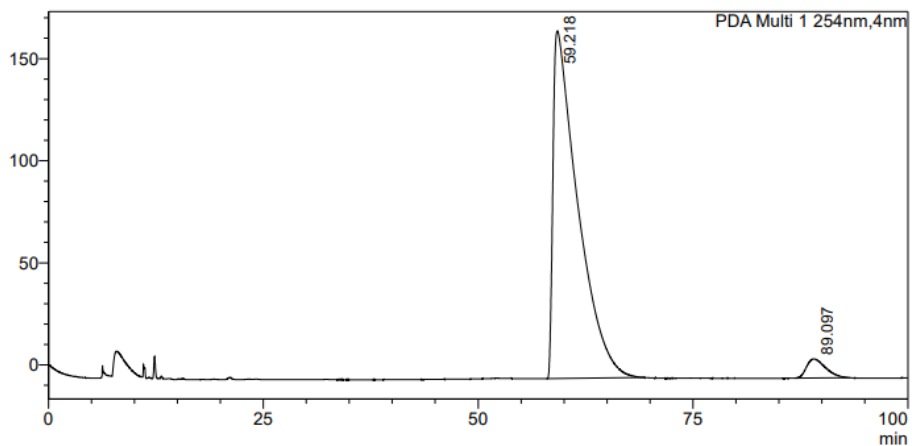

**<Peak Table>**

PDA Ch1 254nm

| Peak# | Ret. Time | Area     | Area%   | Height |
|-------|-----------|----------|---------|--------|
| 1     | 59.218    | 34017475 | 95.996  | 170209 |
| 2     | 89.097    | 1418700  | 4.004   | 9292   |
| Total |           | 35436175 | 100.000 | 179501 |
